# Planktonic protist diversity across contrasting Subtropical and Subantarctic waters of the southwest Pacific

**Andres Gutiérrez-Rodríguez<sup>1,\*</sup>, Adriana Lopes dos Santos<sup>2</sup>, Karl Safi<sup>3</sup>, Ian Probert<sup>4</sup>,  
Fabrice Not<sup>5</sup>, Denise Fernández<sup>1</sup>, Priscillia Gourvil<sup>3</sup>, Jaret Bilewitch<sup>1</sup>, Debbie Hulston<sup>1</sup>,  
Matt Pinkerton<sup>1</sup>, and Scott D Nodder<sup>1</sup>**

<sup>1</sup>National Institute of Water and Atmospheric Research, Wellington, New Zealand

<sup>2</sup>Asian School of the Environment, Nanyang Technological University, 50 Nanyang Avenue, Singapore, 639798

<sup>3</sup>National Institute of Water and Atmospheric Research, Hamilton, New Zealand

<sup>4</sup>Sorbonne Universités, Sorbonne Université, CNRS, FR2424 Station Biologique de Roscoff, France

<sup>5</sup>Sorbonne University, CNRS, UMR7144, Ecology of Marine Plankton Team, Station Biologique de Roscoff, France

\*andres.gutierrez@niwa.co.nz

## ORCID Numbers

- Andres Gutiérrez-Rodríguez: 0000-0003-1274-3752
- Adriana Lopes dos Santos: 0000-0002-0736-4937
- Karl Safi: 0000-0002-7785-1909
- Ian Probert: 0000-0002-1643-1759
- Fabrice Not: 0000-0002-9342-195X
- Denise Fernandez: 0000-0002-8192-9537
- Priscillia Gourvil: 0000-0003-0408-4988
- Jaret Bilewitch: 0000-0002-5285-6121
- Debbie Hulston:
- Matt Pinkerton: 0000-0001-7948-720X
- Scott D Nodder: 0000-0002-1963-8907

**Manuscript prepared for submission to Progress in Oceanography**

## 1 ABSTRACT

2 Planktonic protists are an essential component of marine pelagic ecosystems where they mediate important  
3 trophic and biogeochemical functions. Although these functions are largely influenced by their taxonomic  
4 affiliation, the composition and spatial variability of planktonic protist communities remain poorly  
5 characterized in vast areas of the ocean. Here, we investigated the diversity of these communities in  
6 contrasting oceanographic conditions of the southwest Pacific sector (33-58°S) using DNA metabarcoding  
7 of the 18S rRNA gene. Seawater samples collected during twelve cruises (n = 482, 0-2000 m) conducted  
8 east of New Zealand were used to characterize protist communities in Subtropical (STW) and Subantarctic  
9 (SAW) water masses and the Subtropical Front (STF) that separates them. Diversity decreased with latitude  
10 and temperature but tended to be lowest in the STF. Sample ordination resulting from the abundance  
11 of amplicon single variants (ASVs) corresponded to the different water masses. Overall, *Dinophyceae*  
12 (34% of standardized total number of reads) and Chlorophyta (27%) co-dominated the euphotic zone,  
13 but their relative abundance and composition at class and lower taxonomic levels varied consistently  
14 between water masses. Among Chlorophyta, several picoplanktonic algae species of the *Mamiellophyceae*  
15 class including *Ostreococcus lucimarinus* dominated in STW, while the *Chloropicophyceae* species  
16 *Chloroparvula pacifica* was most abundant in SAW. *Bacillariophyta* (7%), *Prymnesiophyceae* (5%), and  
17 *Pelagophyceae* (3%) classes were less abundant but showed analogous water mass specificity at class  
18 and finer taxonomic levels. Protist community composition in the STF had mixed characteristics and  
19 showed regional differences with the southern STF (50°S) having more resemblance with subantarctic  
20 communities than the STF over the Chatham Rise region (42-44°S). Below the euphotic zone, Radiolaria  
21 sequences dominated the dataset (52%) followed by *Dinophyceae* (27%) and other heterotrophic groups  
22 like Marine Stramenopiles and ciliates (3%). Among Radiolaria, several unidentified ASVs assigned to  
23 *Spumellarida* were most abundant, but showed significantly different distribution between STW and SAW  
24 highlighting the need to further investigate the taxonomy and ecology of this group. This study represents  
25 a significant step forward towards characterizing protistan communities composition in relation to major  
26 water masses and fronts in the South Pacific providing new insights about the biogeography and ecological  
27 preferences of different taxa from class to species and genotypic level.

## 28 **Highlights**

- 29 • Water-mass preference of different taxa emerged at class, species and genotypic level.
- 30 • *Mamiellophyceae* green algae dominated in subtropical waters.
- 31 • *Dinophyceae* and *Chloropicophyceae* green algae dominated in subantarctic waters.
- 32 • A diverse assemblage of Radiolaria dominated the mesopelagic zone.
- 33 • Small rather than large taxa dominated phytoplankton blooms in subtropical waters.

## 34 **Keywords**

35 Planktonic protist, taxonomic diversity, 18S rRNA metabarcoding, Biogeography, southwest Pacific,  
36 Subtropical, Subantarctic, Subtropical Front

## 37 **Competing interests**

38 The authors declare no competing financial interests.

## 39 1. INTRODUCTION

40 Planktonic protists, including phototrophic, heterotrophic and mixotrophic single-celled eukaryotes, have  
41 key roles in the functioning of marine ecosystems (Caron et al. 2012). Phytoplankton are responsible  
42 for 50% of global primary productivity (Field et al. 1998). Most of this primary production is consumed  
43 and processed by heterotrophic protists (i.e. microzooplankton) before becoming available for larger  
44 zooplankton and higher trophic levels (Calbet and Saiz 2005; Calbet and Landry 2004; Zeldis and Décima  
45 2020). From a biogeochemical perspective, the microbial production, consumption and remineralization  
46 of organic matter is at the core of global biogeochemical cycles including the nitrogen and carbon cycles,  
47 and is pivotal in regulating the ocean's capacity to sequester atmospheric CO<sub>2</sub> via the biological carbon  
48 pump (Boyd et al. 2019; Turner 2015).

49 The trophic and biogeochemical processes driven by microbial communities are influenced by their  
50 taxonomic composition, which is tightly coupled to physico-chemical conditions. With increasing evidence  
51 of climate change effects on the physico-chemical status of the ocean (e.g. warming, increased stratification  
52 and reduced nutrient supply, and acidification) (Henley et al. 2020; Pörtner et al. 2014; Sarmiento et  
53 al. 2004) it becomes imperative to better characterize the biogeography and distributions of microbial  
54 communities in relation to oceanographic provinces (Cavicchioli et al. 2019). This is required to establish  
55 a conceptual framework and baseline upon which future environmental change can be evaluated.

56 The diversity and dynamic nature of microbial communities has precluded a comprehensive characteri-  
57 zation of species composition and distributional patterns across at relevant temporal and spatial scales  
58 (Wietz et al. 2019). Extensive application of DNA metabarcoding approaches during the last 10 years  
59 have contributed significantly to this end by characterizing the diversity of marine protist communities  
60 over a wide range of temporal and spatial scales with unprecedented taxonomic resolution and coverage  
61 (Santoferrara et al. 2020). Despite these efforts there are still vast ocean regions like the southwest  
62 (SW) Pacific Ocean that due to its large size and remoteness remain largely unexplored with regards to  
63 high-throughput sequencing characterization of protist communities composition and spatial distribution  
64 of major taxonomic groups. This study contributes to fill this gap by investigating protist communities in  
65 relation to major water masses and oceanographic fronts characteristic of the SW Pacific waters east of

66 New Zealand (Figure 1).

67 New Zealand's continental mass interrupts the converging flows of the South Pacific subtropical gyre  
68 and the northward excursions of the Antarctic Circumpolar Current (ACC). The mixing of the warm  
69 and saltier subtropical water (STW) with the cold, relatively fresh subantarctic water (SAW) (Boyd et al.  
70 1999) results in the genesis of oceanic fronts and semi-permanent eddies with distinctive signatures in  
71 water properties extending along the eastern margin off New Zealand (Fernandez et al. 2018). To the  
72 north, the East Auckland Current (EAUC) brings STW sourced partially by the Tasman Front (Sutton and  
73 Bowen 2014). At about 37°S the EAUC turns south to become the East Cape Current (Stanton et al. 1997)  
74 extending the STW inflow to the Chatham Rise where it separates from the coast to the east as part of  
75 the Subtropical Front (STF) (Deacon 1982). The STF is characterised by strong temperature gradients  
76 and a sharp salinity contrast that intensifies near the rise (Smith et al. 2013), up to 4°C and 0.7 practical  
77 salinity units respectively over 1° latitude in this region (Belkin and Gordon 1996). This transitional  
78 zone separating waters of subtropical origin from the subantarctic ones is known as the Subtropical Front  
79 Zone (SFTZ) (Deacon 1982) and it is bounded by the northern (N-STF) and southern (S-STF) branches  
80 of the STF. The SFTZ can be up to 500 km wide in the Tasman Sea region before it gets constricted  
81 around the South Island of New Zealand where gradients set in motion, guided by the continental slope,  
82 the geostrophic flow associated with the S-STF branch and its coastal expression, the Southland Current  
83 (SC). The mean transport of the SC is about 8 Sv ( $1 \text{ Sv} = 10^6 \text{ m}^3 \text{ s}^{-1}$ ) with 10% corresponding to STW  
84 and 90% to SAW (Sutton 2003). The SC advects this mix of STW and SAW northwards off the east  
85 coast and reaches south of the Chatham Rise through the Mernoo Gap and the Bounty Through. Further  
86 east and along the flanks of Campbell Plateau, the flows associated with the Subantarctic Front (SAF)  
87 carry the largest portion of SAW, about 50 Sv into the region south and east of the Chatham Rise (Bowen  
88 et al. 2014; Stanton and Morris 2004). Access of SAW onto the plateau from the east occurs through  
89 the bathymetric gaps, saddles and ridges where waters then become isolated from the neighbouring  
90 circulation and significantly contribute to the development of oceanographic and climatic processes such  
91 as subantarctic mode water formation (Forcén-Vázquez et al. 2021). Southeast of the Chatham Rise and  
92 away from the plateau the SFTZ re-emerges as a 150 km wide band with the typical signatures of the  
93 STF-N and STF-S fronts (Sutton 2001).

94 STW and SAW have contrasting biogeochemical characteristics (Boyd et al. 1999; Bradford-Grieve  
95 et al. 1999; Chiswell et al. 2015; Heath 1985; Sherlock et al. 2007). North of Aotearoa New Zealand, STW  
96 is oligotrophic (low macro- and micronutrients) and phytoplankton production is considered to be limited  
97 by nitrogen (Zentara and Kamykowski 1981) with pervasive nitrogen-fixation by diazotrophs (Ellwood  
98 et al. 2018; Law et al. 2012). The STF is a dynamic region, characterized by strong temperature and  
99 salinity gradients (Sutton 2001) where high levels of vertical and lateral mixing of nitrogen-limited STW  
100 and macronutrient-rich SAW (Chiswell 2001), leads to regionally elevated annual net primary production  
101 (Murphy et al. 2001; Pinkerton et al. 2005). In SAW iron is the primary limiting nutrient for phytoplankton  
102 growth (Banse 1996; Boyd et al. 1999) although silicate and light can become limiting at times in SAW  
103 extending southeast of Aotearoa New Zealand which is considered high-nutrient, low-chlorophyll, low-  
104 silicate (HNLC-LSi) region (Boyd et al. 2010; Dugdale et al. 1995). These conditions are typically  
105 associated with SAW north of the Subantarctic Front (SAF), which is an area commonly referred to as the  
106 Subantarctic Zone (SAZ) (Trull et al. 2001) or the Subantarctic Water Ring (Longhurst 2007). In the SAZ,  
107 increasing availability of dissolved silica southwards shifts the Polar Frontal Zone extending between the  
108 SAF and the Polar Front to ‘standard’ Southern Ocean HNLC conditions (Rigual-Hernández et al. 2015).

109 Several studies have characterized microbial community composition in STW and SAW east of New  
110 Zealand, using microscopy (Chang and Gall 1998), pigment (Delizo et al. 2007) and flow-cytometry  
111 (Hall et al. 1999). These regional studies have focused mainly on the STF zone or coastal communities  
112 (Chang et al. 2003; Hall et al. 2006), while studies analyzing wider phytoplankton distribution across  
113 STW and SAW have targeted specific groups such as coccolithophores (Chang and Northcote 2016;  
114 Saavedra-Pellitero et al. 2014). More process-oriented studies have also provided partial information  
115 on phytoplankton composition in SAW and STW east of New Zealand (Chiswell et al. 2019; Ellwood  
116 et al. 2013; Peloquin et al. 2011). These studies have described the prevalence of larger cells and diatoms  
117 through winter and spring in the more productive waters of the STF, compared to STW and SAW. Diatom-  
118 and autotrophic flagellate-dominated communities have been reported in STW on the northern flank of the  
119 Chatham Rise during spring while dinoflagellates and small flagellates are documented as dominating  
120 the eukaryotic phytoplankton in SAW (Bradford-Grieve et al. 1997; Chang and Gall 1998). Diatom  
121 and coccolithophore species composition of sediment trap fluxes on the northern (STW-influenced) and

122 southern (SAW-influenced) flanks of the Chatham Rise highlight the importance of these phytoplankton  
123 groups in the region (Wilks et al. 2021). However, there is surprisingly only little information available on  
124 the taxonomic composition of phytoplankton communities prevailing in open-ocean waters away from  
125 the STFZ over the Chatham Rise region (Chang and Northcote 2016; Chiswell et al. 2019; Peloquin et al.  
126 2011; Twining et al. 2014). Further east of this region (170 °W), phytoplankton community composition  
127 from polar to equatorial waters have been characterized using pigment analysis (DiTullio et al. 2003)  
128 whereas a more recent study applied DNA metabarcoding analysis to investigate microbial diversity  
129 patterns in relation to physico-chemical gradients and oceanographic features (Raes et al. 2018). DNA  
130 metabarcoding has also been recently applied to investigate protist diversity changes across the Southland  
131 Current, a coastal expression of the STF that flows along the eastern margin of New Zealand's South  
132 Island (Allen et al. 2020). However, the taxonomic composition of protistan communities associated with  
133 open-ocean water masses in the SW Pacific and across major oceanographic fronts that separate them is  
134 still lacking.

135 The aims of the present study are: 1) to characterize the diversity of protistan communities in STW and  
136 SAW east of New Zealand and across the STFZ that separates these water masses, and 2) to investigate the  
137 spatial distributional patterns of the main protistan taxonomic groups and species in relation to physical  
138 and chemical variability of the main water masses east of Aotearoa New Zealand. Specifically, we  
139 want to know how (dis-)similar are protist communities in the biogeochemically contrasting STW and  
140 SAW? What are the main environmental factors responsible for these differences? Which are the main  
141 taxonomic groups associated with each water mass and their environmental preferences? To do so we have  
142 applied DNA metabarcoding analysis (18S rRNA) to > 450 samples collected during 12 oceanographic  
143 voyages conducted over several years (2009-2017) and different seasons across STW and SAW east of  
144 New Zealand. This sequence data together with core physico-chemical and biological parameters (e.g.  
145 temperature, salinity, mixed-layer depth (MLD), macronutrients, total and size-fractionated chlorophyll  
146 a) provides the most comprehensive dataset of protistan plankton diversity in STW and SAW in the SW  
147 Pacific and contributes significantly towards building a robust baseline against which future changes in the  
148 region can be evaluated.

| Cruise  | Start    | End      | Project              | Water mass        | min Lat | max Lat | Season | N stations | N Samples |
|---------|----------|----------|----------------------|-------------------|---------|---------|--------|------------|-----------|
| TAN0902 | 30-01-09 | 03-02-09 | BiophysMoorings      | SAW // STF // STW | -46.62  | -41.23  | Summer | 3          | 28        |
| TAN0909 | 27-10-09 | 30-10-09 | BiophysMoorings      | SAW // STF // STW | -46.64  | -41.2   | Spring | 3          | 32        |
| TAN1006 | 06-05-10 | 08-05-10 | BiophysMoorings      | SAW // STF // STW | -46.64  | -41.19  | Autumn | 3          | 33        |
| TAN1103 | 19-02-11 | 21-02-11 | BiophysMoorings      | SAW // STF // STW | -46.61  | -41.31  | Summer | 3          | 34        |
| TAN1113 | 29-09-11 | 01-10-11 | BiophysMoorings      | SAW // STF // STW | -46.63  | -41.22  | Spring | 3          | 34        |
| TAN1203 | 17-02-12 | 05-03-12 | SOAP                 | STF               | -44.61  | -43.48  | Summer | 10         | 10        |
| TAN1204 | 19-03-12 | 21-03-12 | BiophysMoorings      | SAW // STF // STW | -46.64  | -41.26  | Autumn | 4          | 32        |
| TAN1212 | 19-09-12 | 05-10-12 | Spring Bloom II      | STW               | -37.87  | -37.51  | Spring | 19         | 105       |
| KAH1303 | 08-03-13 | 14-03-13 | Bay of Plenty        | STW               | -39.17  | -38.76  | Autumn | 12         | 37        |
| TAN1516 | 05-12-15 | 21-12-15 | Chatham Rise         | STF               | -44.42  | -42.72  | Summer | 20         | 39        |
| TAN1604 | 14-05-16 | 21-05-17 | Cross-shelf Exchange | STW               | -36.18  | -33.38  | Autumn | 7          | 42        |
| TAN1702 | 18-03-17 | 29-03-17 | Campbell Plateau     | SAW               | -54.26  | -46.77  | Autumn | 13         | 52        |
| TAN1802 | 13-02-18 | 13-02-18 | SO-RossSea           | SAW               | -58.03  | -58.03  | Summer | 1          | 5         |

**Table 1.** Summary of cruises from which samples were collected. Information includes the cruise identification code, start and end dates, the project or region, the water masses surveyed, latitudinal and seasonal coverage, number of stations and samples collected in each cruise.

## 149 2. METHODS

### 150 2.1. Study area and sample collection

151 Seawater samples and data were collected during 12 research cruises conducted in SW Pacific waters east  
152 of Aotearoa New Zealand between 2009 and 2017 (Figure 1). The dataset covered 100 stations distributed  
153 between 54.3 and 33.4 °S with seawater samples (n = 482) collected over the 0-2000 m depth range and  
154 covering spring, summer and autumn periods (Table 1). The number of DNA samples from STW (n=269)  
155 were 2-fold higher than those from SAW (n=120) and STF (n=94) mainly due to the large number of  
156 samples from the Spring Bloom II voyage (TAN1212,(Chiswell et al. 2019)) (Table 1). The seasonality  
157 coverage was similar among the three different regions (STW, SAW, STF) but was biased against winter  
158 with most samples collected during spring, summer and autumn periods. (Table 1; Figure S1). Details  
159 about latitudinal and seasonal coverage of each water mass and the sample density distribution of analysed  
160 DNA samples, together with physico-chemical variables, are shown in Figure S2.

161 Samples were collected from 10 L Niskin bottles attached to a CTD rosette in association with



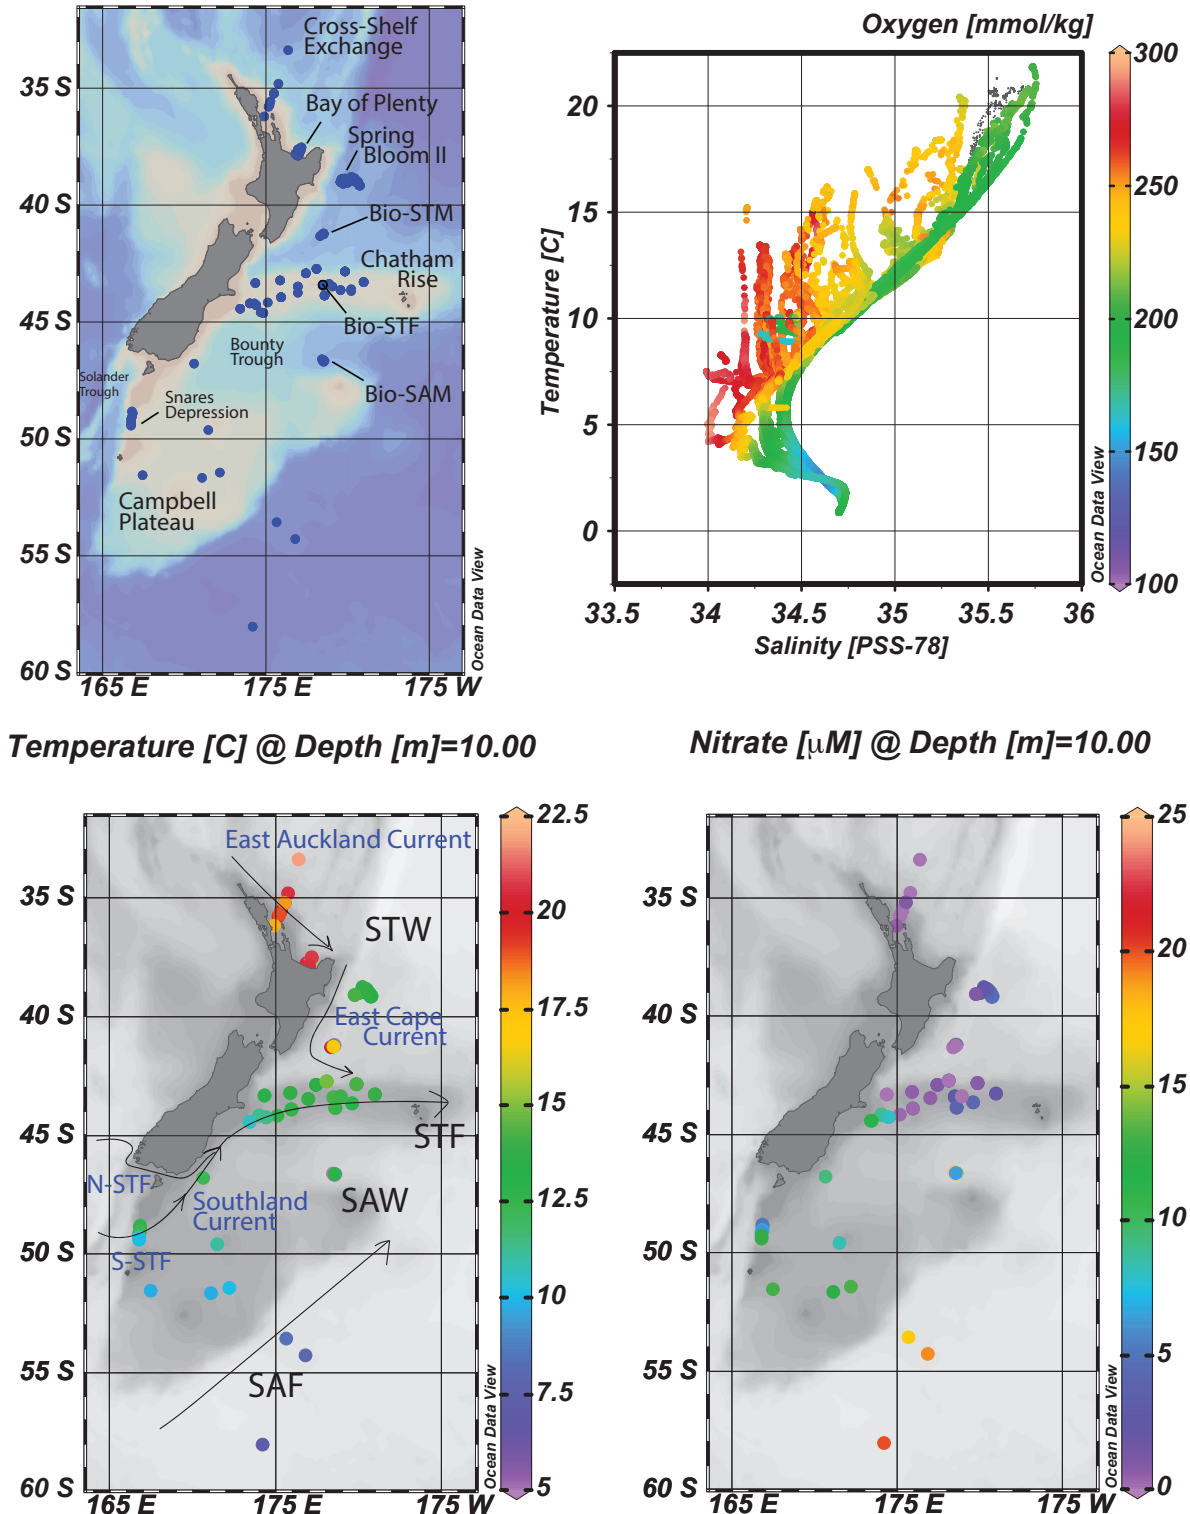

**Figure 1.** Study area. (A) Map of the study area with the sampling sites locations. (B) T-S diagram with oxygen concentration. Surface (C) temperature (C) and (D) nitrate concentration (D) at sampling sites in relation to major water masses and currents and fronts of the study region. North (N-STF) and South Subtropical Front (S-STF) adapted from Smith et al. 2013

162 a Seabird 9plus CTD, equipped with temperature, salinity, dissolved oxygen, fluorometer and beam  
163 transmissiometer sensors.  $K_d$ PAR was estimated from chlorophyll *a* (Chl *a*) (Morel and Maritorena 2001).  
164 The euphotic zone depth (Zeu) was defined as the depth where downwelling PAR irradiance was 1%  
165 of incident irradiance ( $E_0$ ). The MLD was defined as the shallowest depth where density exceeded the  
166 5 m value by  $0.03 \text{ kg/m}^3$  (Gardner et al. 1995). During the TAN1516 voyage samples were collected  
167 with a Niskin bottle deployed manually down to 10 m depth and from the R/V *Tangaroa* Underway  
168 Flow-Through System (TUFTS) system equipped with temperature, salinity, and fluorescence sensors.  
169 Seawater samples for nutrients, Chl *a* and DNA were sampled from the Niskin bottles using acid-washed  
170 silicone tubing and filtered through different types of filters for processing, as outlined below.

## 171 **2.2. Nutrients, total and size-fractionated chlorophyll a**

172 Samples for nutrients were filtered through 25 mm-diameter Whatman GF/F filters into clean 250 ml  
173 polyethylene bottles and frozen at  $-20^\circ\text{C}$  until analysis using an Astoria Pacific API 300 microsegmented  
174 flow analyzer (Astoria-Pacific, Clackamas, OR, United States) according to the colorimetric methods  
175 described in (Law et al. 2011).

176 For total Chl *a*, 250-400 mL seawater were filtered under low vacuum ( $<200 \text{ mm Hg}$ ) through 25  
177 mm GF/F filters. These were folded and wrapped in aluminum foil or placed in Secol envelopes and  
178 stored at  $-80^\circ\text{C}$  or in liquid nitrogen until analysis. For size-fractionated Chl *a* ( $0.2\text{-}2 \mu\text{m}$ ,  $2\text{-}20 \mu\text{m}$ ,  
179  $>20 \mu\text{m}$ ) 400-500 mL were filtered sequentially through 47 mm polycarbonate filters by vacuum. Filters  
180 were folded and stored in 1.5 mL cryovials at  $-80^\circ\text{C}$  until analysis using 90% acetone extraction by  
181 spectrofluorometric techniques on a Varian Cary Eclipse fluorometer following method APHA 10200 H  
182 (Baird 2017)

## 183 **2.3. DNA samples collection and extraction**

184 Seawater samples of 1.5–5.0 L were filtered either through  $0.22 \mu\text{m}$  filters (47 mm-diameter polyether-  
185 sulfone, Pall-Gelman) using low vacuum or through  $0.22 \mu\text{m}$  Sterivex filter units (Millipore) using a  
186 peristaltic pump (Cole-Palmer). Disc filters were then folded and placed in cryovials and sterivex units  
187 were filled with RNAlater and flash-frozen in liquid nitrogen prior to storing at  $-80^\circ\text{C}$ . Disc filters were  
188 cut in two halves first and then into small pieces using a sterile blade. Each half was placed in separate

189 tubes and lysed in parallel (2 h at 65 °C on a Boekel thermomixer set at 750 rpm) using the Nucleospin  
190 Plant kit Midi Kit (Macherey-Nagel, Duren, Germany). The 100 µL of PL2 buffer recovered from each  
191 halved filter was then pooled together and the DNA extraction procedure continued with the Mini version  
192 of the Nucleospin Plant kit.

193 For Sterivex filters DNA was extracted using a Tris-buffered lysis solution containing EDTA, Triton  
194 X 100 and lysozyme (pH = 8.0) and the Qiagen DNeasy Blood & Tissue. Briefly, to collect cells that  
195 eventually detached from the filter surface, the RNAlater present in the filter unit was collected into a 2 mL  
196 Eppendorf tube using a syringe and then centrifuged (13,000 rpm, 10 min). The pellet was resuspended  
197 using 1 mL of the lysis solution and pipetted back into the original Sterivex. The cartridge was secured  
198 using Parafilm, put into a 50 mL falcon tube and incubated in a shaking incubator overnight (75 rpm, 37  
199 °C). 1 mL of buffer Qiagen buffer AL and 40 µL of proteinase K (20 mg/mL) was then added into the  
200 Sterivex. After securing the Sterivex, as described previously, the filter unit was incubated for 2 hours (75  
201 rpm, 56 °C). Followed the incubations the lysate was recovered from the cartridge and DNA extraction  
202 and purification continued following manufacturer's instructions in the Qiagen DNeasy Blood & Tissue.

## 203 **2.4. PCR amplification, amplicon sequencing and sequence processing**

204 The V4 region of the 18S rRNA gene was amplified using the eukaryotic primers V4F\_illum (CCAGCAS-  
205 CYGCGGTAATTCC) and V4R\_illum (ACTTTCGTTCTTGATYRATGA) with Illumina overhang adapters  
206 (TCGTCGGCAGCGTCAGATGTGTATAAGAGACAG and GTCTCGTGGGCTCGGAGATGTGTATAA-  
207 GAGACAG) following procedures described in (Gutierrez-Rodriguez et al. 2019). PCR reactions were  
208 prepared in 50 µL using 2x KAPA HiFi HotStart ReadyMix, (0.3 nM dNTP, 2.5 mM MgCl<sub>2</sub>), 0.5 µM of  
209 each primer and of DNA template. The thermocycling profile included 95 °C/3 min, 10 cycles (98 °C/10s,  
210 44 °C/20s, 72 °C/15s), 15 cycles (98 °C/10s, 62 °C/20s, 72 °C/15s) and 72 °C/7min).

211 Amplicon sequencing was conducted at the Genotoul GeT core facility (Toulouse, France) using an  
212 Illumina Miseq and a 2 x 250 cycles Miseq kit version 2. 482 samples were sequenced generating a total  
213 of 9166190 reads, with a median sequencing depth across all samples of 18954 reads per sample (range  
214 = 6539 – 36551). Obtained sequences were processed using the DADA2 pipeline (Callahan et al. 2017)  
215 following the procedure described by (Trefault et al. 2021). Taxonomic assignation was made against

216 PR2 database version 4.12 (<https://pr2-database.org/>), yielding 16861 amplicon single variants (ASVs)  
217 assigned to protistan taxa. Details on the number of samples, reads and ASVs associated with each water  
218 mass are shown in (Table S1).

## 219 **2.5. Pre-processing of ASV table and diversity analysis**

220 We standardized the ASV table to the sequencing depth in each sample by normalizing the relative  
221 abundance to the mean number of sequences obtained across samples (median sequencing depth \* (number  
222 of reads per ASV /total number reads per sample)). The relative contribution of specific groups in  
223 different water masses and regions were estimated from the sum of standardized reads across the samples  
224 considered.

225 Similarity analysis was undertaken using non-multidimensional scaling (nMDS) and ANOSIM using  
226 phyloseq (McMurdie and Holmes 2013) and vegan (Oksanen et al. 2019) R packages. Differences in  
227 species abundance across waters masses and regions was analysed using negative binomial generalized  
228 linear models coded in the DESeq2 package (Love et al. 2014). For analysis of higher taxonomic rank  
229 (division, class), distribution and their relation to environmental variables, the tax\_glom function in  
230 phyloseq was used to agglomerate the previously standardized ASV table into the chosen taxonomic level.

## 231 **2.6. Data accessibility**

232 Physico-chemical, biological and geographic data including measurements of temperature, salinity, oxygen  
233 and transmissivity obtained with a Seabird 9plus; inorganic nutrients; total and size-fractionated chl *a*);  
234 and estimated mixed-layer and euphotic zone depth can be found PANGAEA repository archive data  
235 sets (submitted to PANGAEA). Raw sequence data are available on NCBI under accession number  
236 PRJNA756172 (). The quality filtered ASV table together with the taxonomy and metadata table used to  
237 build the phyloseq object are provided as csv tables. R scripts for data processing and figures can be found  
238 in [https://github.com/agutierrez2001/Catalyst\\_Biogeography](https://github.com/agutierrez2001/Catalyst_Biogeography).

## 239 3. RESULTS

### 240 3.1. Physical, chemical and biological variability

241 STW was identified as those waters with surface salinity >35 psu (range = 35.1 - 35.6) (Figure 2) and  
242 included samples collected during the Cross-shelf Exchange II (TAN1604), the Bay of Plenty (KAH1303),  
243 the Spring Bloom II (TAN1212) voyages, and several cruises that visited the northern mooring site  
244 (Bio-STM) of the Biophysical Moorings long-term monitoring program (Nodder et al. 2016) (Figure 1,  
245 Table 1 and Figure S1). The Subtropical Front (STF) had salinity values ranging between 34.4 and 35.0 psu  
246 (Figure 2) and included samples collected on the Chatham Rise during TAN1516 (Fisheries Oceanography  
247 IV) and several Biophysical Mooring voyages as well as those collected in the STF upstream of the  
248 Chatham Rise, as it flows northwestward between the South Island and the Campbell Plateau (TAN1702)  
249 (Figure 1, Table 1, Figure S1). Typically SAW had salinity values <34.4 (Figure 2) and included samples  
250 collected at the southern Biophysical Mooring site located in the Bounty Trough (Bio-SAM), and at  
251 several stations on Campbell Plateau, and in the SAF south of the plateau (TAN1702, TAN1802) (Figure 1,  
252 Table 1, Figure S1).

253 Sea-surface temperature was on average lowest in SAW ( $10.7 \pm 2.4$  °C, mean  $\pm$  standard deviation,  
254 sd), intermediate in the STF ( $13.1 \pm 1.7$  °C) and highest in STW ( $16.1 \pm 3.2$  °C) (Figure 2). Temperature  
255 showed greater overlap among water masses and regions than surface salinity (Figure 2). STW sampled  
256 during the Spring Bloom II voyage, for instance, showed surface temperature consistently lower than  
257 15 °C (12.5 - 14.5 °C) (Figure 2). Nitrate concentrations were lowest in STW ( $2.98 \pm 1.96$   $\mu\text{mol/L}$ ),  
258 intermediate and more variable in STF waters ( $4.28 \pm 4.17$   $\mu\text{mol/L}$ ) and highest in SAW ( $12.17 \pm 4.02$   
259  $\mu\text{mol/L}$ ), consistent with HNLC conditions of these southern waters (Figure 1D).

260 Chl *a* concentration in the surface mixed-layer was on average higher in the STF ( $0.65 \pm 0.65$   $\mu\text{g/L}$ )  
261 compared to STW ( $0.38 \pm 0.31$   $\mu\text{g/L}$ ) and SAW ( $0.37 \pm 0.23$   $\mu\text{g/L}$ ) (ANOVA,  $F(2,220) = 14.2$ ,  $p < 0.0001$ ).  
262 Most of the DNA samples included in this study were taken from oligotrophic and mesotrophic waters  
263 (surface Chl *a* <0.5  $\mu\text{g/L}$ ) with only a few collected from waters with Chl *a* concentrations >1.0  $\mu\text{g/L}$ . The  
264 smallest size-fraction (0.2 – 2.0- $\mu\text{m}$  Chl *a*) dominated the phytoplankton communities across all water  
265 masses but more so in STW (Chl *a* <2.0  $\mu\text{g/L}$   $\approx$  75 % of total Chl *a*) compared to SAW and STF (40-50%,

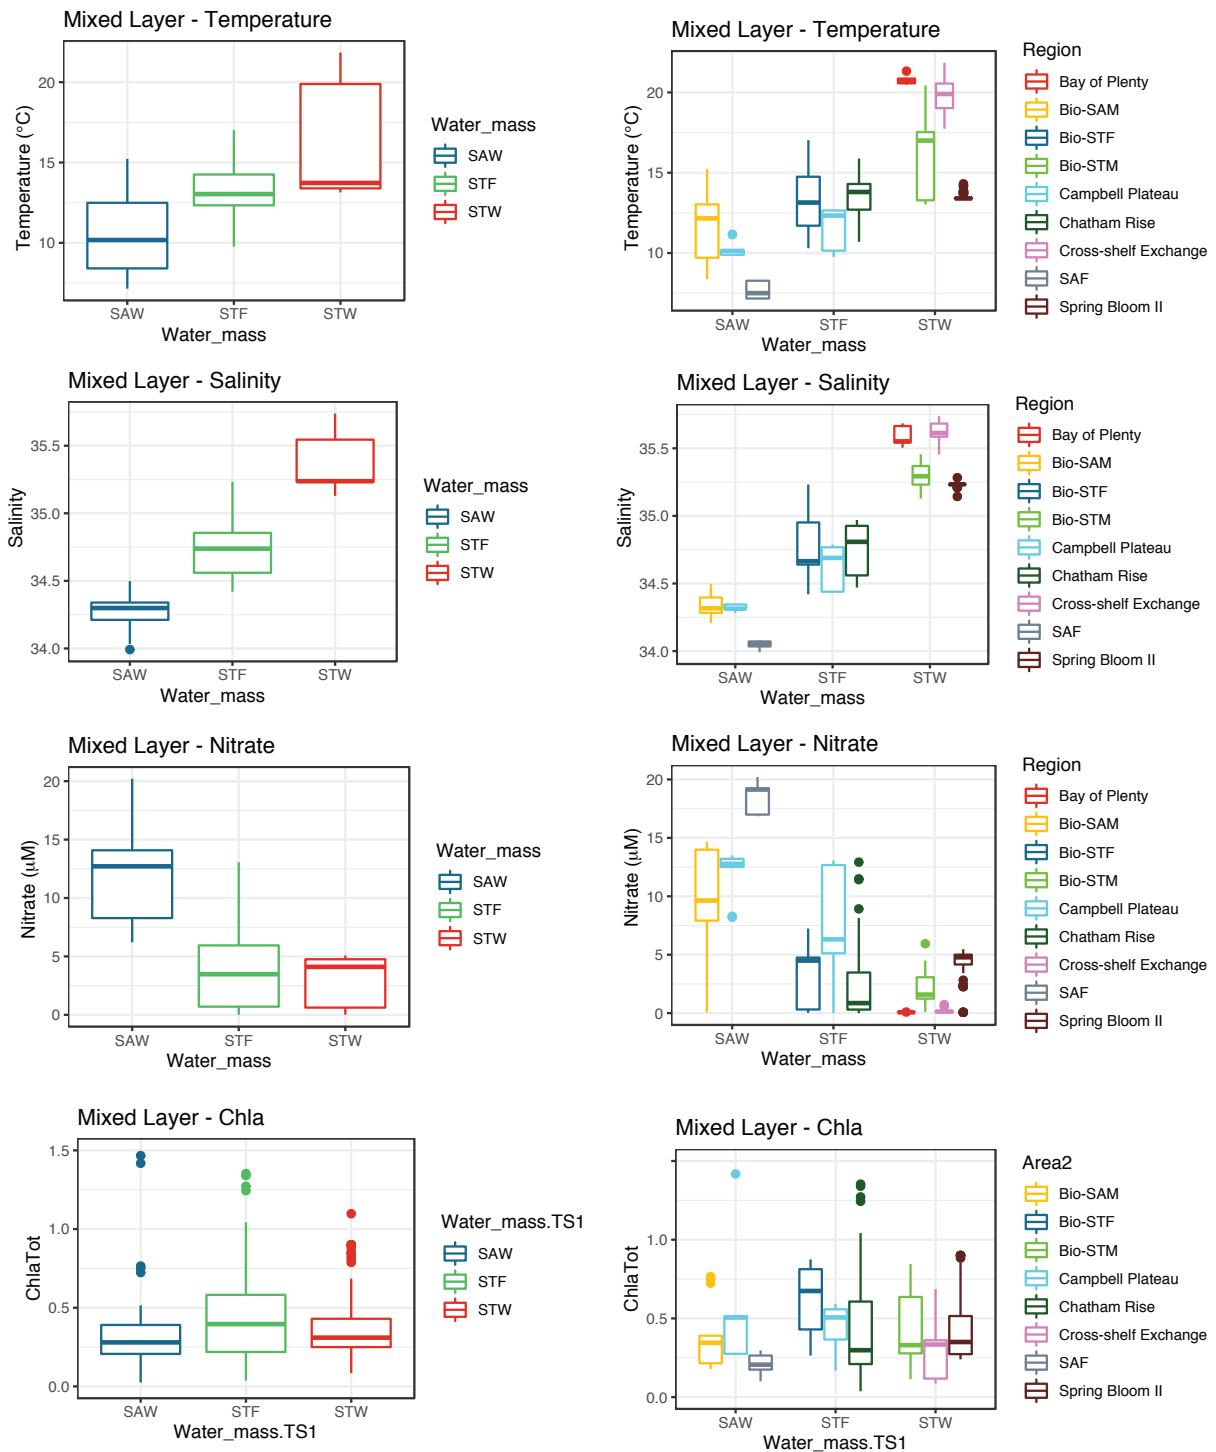

**Figure 2.** Surface mixed-layer physico-chemical variability. Box-plot representation of surface mixed-layer temperature and salinity, nitrate and chlorophyll a concentration in each water mass. Box-plots show the median, the first and third quartiles (lower and upper hinges) and the values within (line) and outside (dots) the  $\pm 1.5 * IQR$  (IQR, interquartile range).

266 Figure S3). The contribution of  $>20\text{-}\mu\text{m}$  size-fraction to surface mixed layer Chl *a* was higher in SAW  
267 and STF, and although it remained on average relatively low ( $<15\%$ ), it occasionally reached  $> 50\%$  levels  
268 ( Figure S3).

269 A closer look revealed regional differences within each water mass (Figure 2). In SAW for instance,  
270 SAF surface waters were colder and fresher than those on the Campbell Plateau (TAN1702) and in the  
271 Bounty Trough (Bio-SAM site) (Figure 2). Surface nitrate concentrations were lower in the Bounty  
272 Trough compared to Campbell Plateau and SAF, consistent with the southwards strengthening of HNLC  
273 conditions. *Chla<sub>ML</sub>* concentration was higher on Campbell Plateau ( $0.62 \pm 0.48$ , mean  $\pm$  sd) compared  
274 to surface waters in the Bounty Trough ( $0.33 \pm 0.20$ ) and the SAF ( $0.21 \pm 0.07$ ) (Figure 2), although  
275 differences were only significant between the Campbell Plateau and SAF to the south (one-way ANOVA,  
276  $F(2,33) = 4.494$ ,  $p = 0.019$ ).

277 Within STW, surface temperature and salinity were highest in northernmost waters sampled during  
278 the Cross-shelf Exchange II voyage (TAN1604) and lowest in STW waters sampled during the Spring  
279 Bloom II voyage (TAN1212) conducted at the beginning of austral spring (September-October) (Figure 2).  
280 Temperature and salinity at the Biophysical Mooring subtropical site (Bio-STM) were intermediate on  
281 average and had a greater range that reflected the wider temporal variability covered by multiple visits  
282 conducted at different times of the year over several years (Table 1). Nitrate concentrations showed  
283 the opposite trend with highest values associated with the colder and deep-mixed waters, and lower  
284 values reflecting warmer and stratified waters of the Bay of Plenty and Cross-shelf Exchange II voyages  
285 (Figure 2).

286 Regional differences were also observed between the S-STF flowing north of the Campbell Plateau  
287 through the Snares Depression (Figure 1), which transported colder and fresher waters, and the STF further  
288 north flowing eastwards over the Chatham Rise (STF, Chatham Rise) (Figure 2). Nitrate concentrations  
289 tended to be higher in STF waters adjacent to Campbell Plateau than on the Chatham Rise reflecting the  
290 HNLC nature of the plateau. Relatively high nitrate concentrations ( $>10 \mu\text{mol/L}$ ) were also measured  
291 during summer (TAN1516) on the Chatham Rise at some stations located in the southwestern flank of the  
292 STF with colder ( $10.7$  and  $11.3 \text{ }^\circ\text{C}$ ) and fresher ( $34.47$  and  $34.56$ ) characteristics of surface mixed-layer  
293 waters indicating a SAW influence (Figure 1).

### 294 **3.2. Alpha-diversity – Species richness**

295 Species richness and the Shannon diversity index estimated in the euphotic zone were on average lower  
296 in the STF compared to SAW and STW (Figure 3A). Highest diversity in STW was observed in the  
297 northernmost waters surveyed during the Cross-shelf Exchange II voyage and at the Bio-STM site, which  
298 included samples collected during various cruises that spanned multiple years and seasons. Protist species  
299 richness during the Spring Bloom II voyage was substantially lower than these other STW locations  
300 (Figure 3B). In SAW diversity was lower on Campbell Plateau compared to open ocean regions adjacent to  
301 flows of the SAF (Figure 3B) located to the north and south of the plateau, respectively (Figure 1). Within  
302 the STF, diversity was also lower in upstream waters of the S-STF located further south (46-49 °S) than  
303 in the STFZ in the Chatham Rise region (43-45 °S) (Figure 1, Figure 3). Here, higher diversity values  
304 were associated with the Bio-STF site visited multiple times in different seasons during the Biophysical  
305 Mooring program (2009-12)(Table 1) than during the summer TAN1516 voyage, which covered the  
306 Chatham Rise region more extensively (Figure 1).

307 Species diversity in the euphotic zone tended to decrease with latitude (model I linear regression,  
308  $F(1,236) = 25.6$ ,  $R^2 = 0.10$ ,  $p\text{-value} < 0.0001$ ), although differences in mean diversity values were observed  
309 among water masses and regions with similar latitudes (Figure S4). Similar relationships were observed  
310 between diversity and temperature (model I linear regression,  $F(1,208) = 59.1$ ,  $R^2 = 0.20$ ,  $p\text{-value} < 0.0001$   
311 ) with regional differences modulating this trend (Figure S5). Within STW for instance, species richness in  
312 the euphotic zone was higher in oligotrophic waters and decreased with increasing Chl *a*, being generally  
313 higher in warmer waters (Figure S6). Samples from the STF presented lower species richness in the  
314 euphotic zone compared to SAW and STW across the entire range of Chl *a* and nitrate concentrations (  
315 Figure S6).

316 Diversity patterns in the aphotic zone were investigated on the Biophysical Moorings dataset only  
317 (Bio-STM, -STF and -SAM,  $n = 113$ ). Diversity in the aphotic layer of the STW and SAW sites was lower  
318 than in the sunlit layers (Figure 3C). In the STF, however, this was higher in the aphotic compared to the  
319 euphotic layer, which resulted in similar estimates of species richness in the aphotic zone of the different  
320 water masses unlike the diversity pattern observed for the euphotic zone (Figure 3).



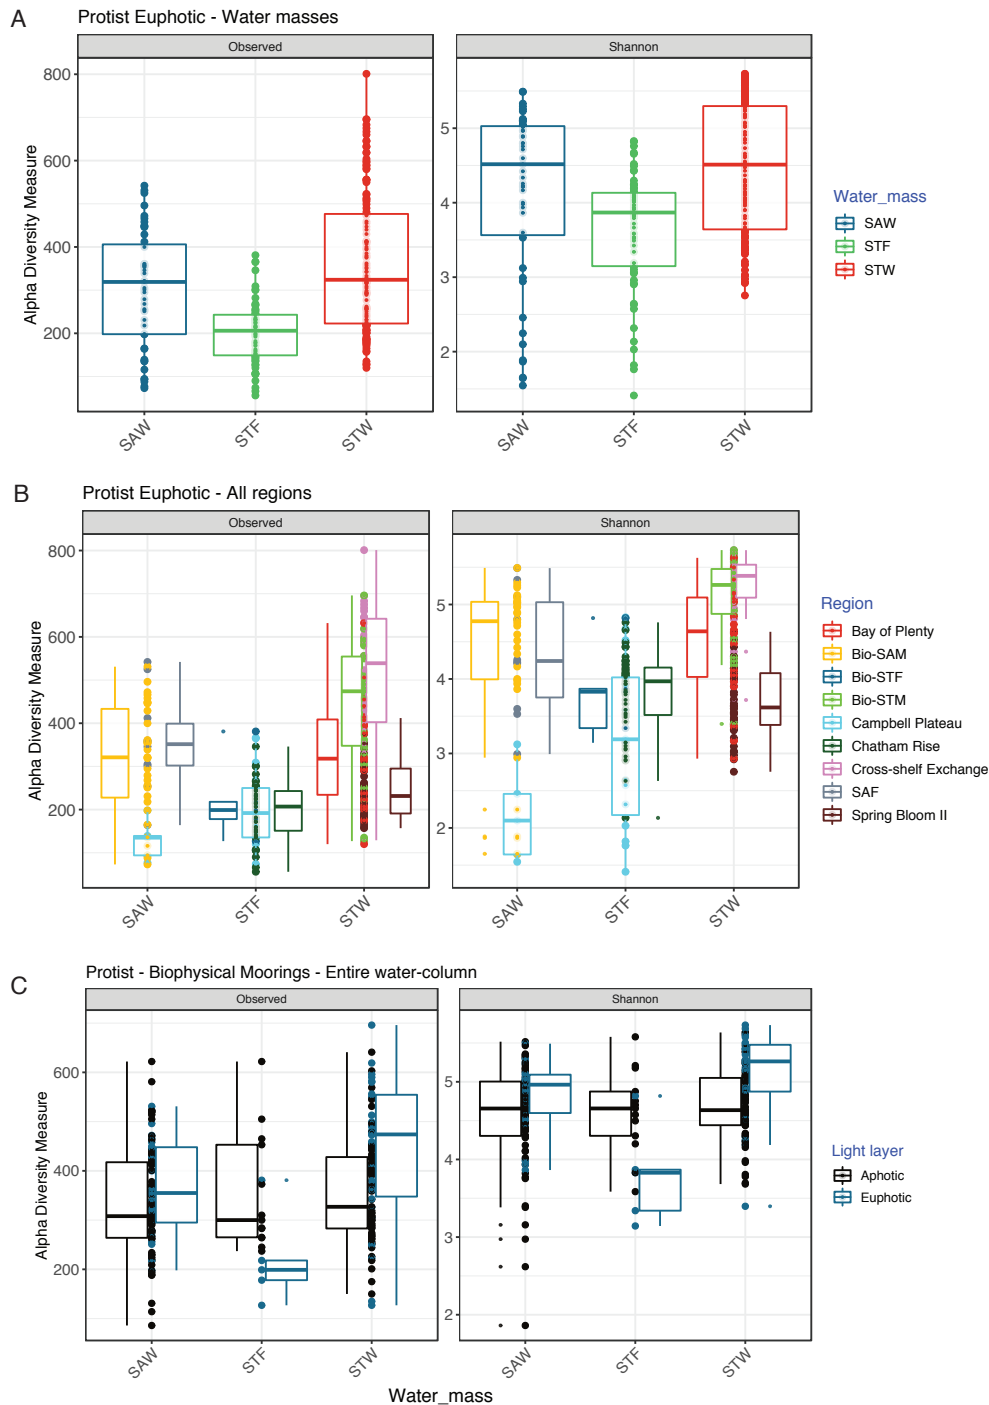

**Figure 3.** Species richness and diversity index estimated for (A) the euphotic zone of each water masses (SAW, STF, and STW); (B) the euphotic zone of each regions and (C) the aphotic zone of the Biophysical Mooring programme sites SAF (Subantarctic Front) and Campbell Plateau correspond to the same voyage TAN1702 (April 2017).

### 321 **3.3. Beta-diversity of protistan communities**

322 To explore the similarities between protistan communities in different geographic samples we performed  
323 principal component analysis on ASV abundance. The first analysis with all samples yielded two main  
324 clusters corresponding to samples from the euphotic and aphotic zone (Figure 4A). A second analysis  
325 focused on the euphotic zone cluster samples (n = 239) according to different water masses although  
326 certain overlaps also occurred, particularly between the STF and SAW samples (Figure 4B). Different  
327 regions tended to cluster separately as well, with STW samples from the Spring Bloom II voyage forming  
328 a separate cluster from that of the Cross-shelf Exchange and Bay of Plenty cruises (Figure 4B).

329 To investigate the influence of different oceanographic drivers on the community composition we  
330 performed PERMANOVA analysis with continuous variables of physical (T, Sal), chemical ( $\text{NO}_3^-$  con-  
331 centration - euphotic zone median  $\text{NO}_3^-$ ) and biological (Chl *a* concentration - water-column median)  
332 parameters. The analysis was conducted on a subset of samples (n=182) for which these measurements  
333 were available (STW=34, STF=53, SAW=95). All variables yielded statistical significance ( $p < 0.001$ ) with  
334 salinity explaining most of the variability (F.Model = 34.4,  $R^2 = 0.13$ ,  $P < 0.001$ ) followed by temperature  
335 ( $R^2 = 0.08$ ) and nitrate ( $R^2 = 0.06$ ) with chl *a* concentration explaining a minor fraction of this variability  
336 ( $R^2 = 0.02$ ) (Figure S7) (Table S2). Overall this set of variables left 69% of the variability unexplained. The  
337 second PERMANOVA analysis included categorical variables (e.g. Water mass and region) showed that  
338 while Water mass explained 16% of the variability (F. Model = 28.0,  $P < 0.001$ ) – similar to that explained  
339 by salinity – the region explained an additional 27% of the variability (F.Model = 15.4,  $P < 0.001$ ) and up  
340 to 51% of the variability together with physico-chemical and biological continuous variables included in  
341 the first PERMANOVA analysis (Table 2).

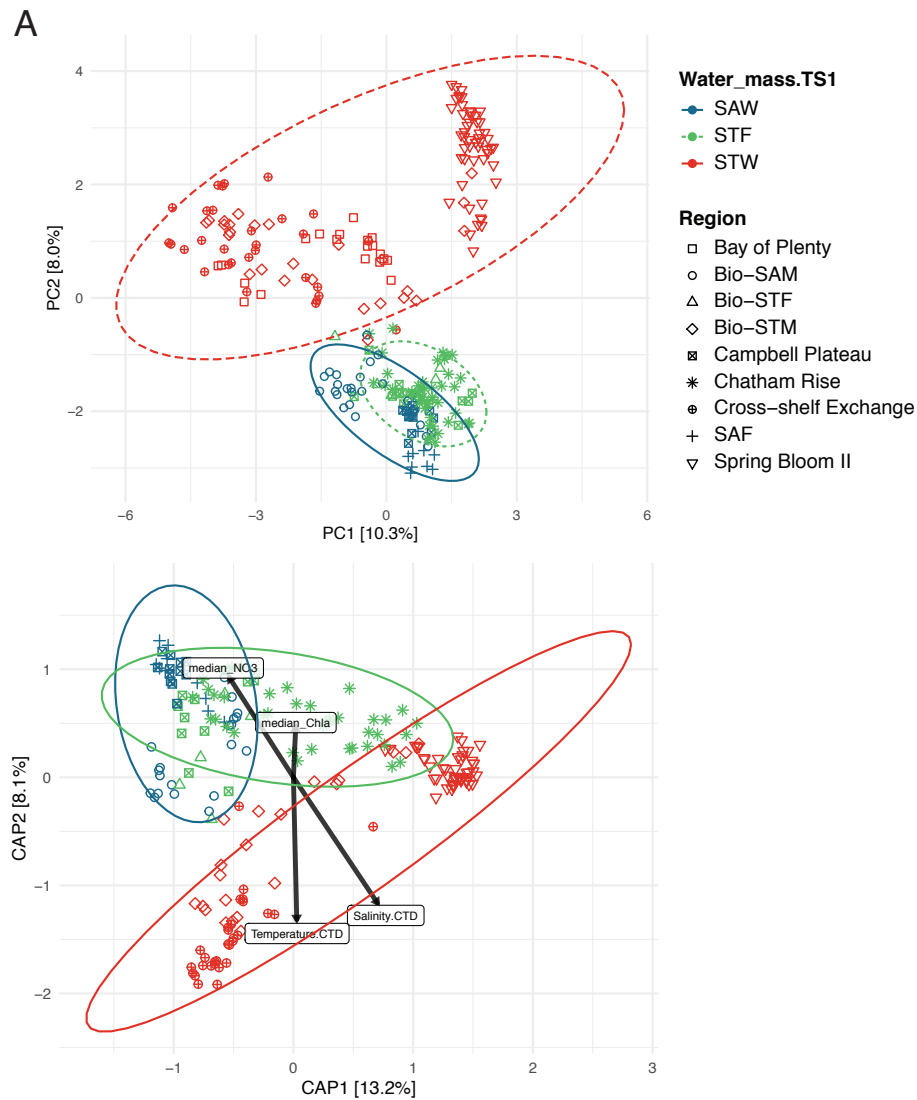

**Figure 4.** Figure 4. (A) Principal component analysis based on ASV composition of euphotic samples only color coded by water masses and shapes for regions/voyages (n=240). (B) Biplot of redundancy analysis (RDA) computed at species (ASV) level in the euphotic zone for which T, Sal, Nitrate and Chl *a* measurements were available. Arrows indicate the sign and strength of the correlation between community composition and environmental variables that were significant in PERMANOVA analysis (n=197) samples from Chatham Rise TAN1516 lack CTD and MLD data

| Variable               | Df  | SumsOfSqs | MeanSqs | F.Model | R <sup>2</sup> | Pr(>F) |
|------------------------|-----|-----------|---------|---------|----------------|--------|
| Water-mass             | 2   | 9.321     | 4.6606  | 27.6669 | 0.16054        | 0.001  |
| Region                 | 6   | 15.558    | 2.593   | 15.3932 | 0.26796        | 0.001  |
| Temperature            | 1   | 1.459     | 1.4588  | 8.6597  | 0.02512        | 0.001  |
| Salinity               | 1   | 1.05      | 1.0503  | 6.2351  | 0.01809        | 0.001  |
| median NO <sub>3</sub> | 1   | 1.076     | 1.0763  | 6.3893  | 0.01854        | 0.001  |
| median Chl <i>a</i>    | 1   | 1.128     | 1.1283  | 6.6977  | 0.01943        | 0.001  |
| Residuals              | 169 | 28.469    | 0.1685  |         | 0.49032        | 0.001  |
| Total                  | 181 | 58.062    |         |         | 1              |        |

**Table 2.** Summary of PERMANOVA analysis including the Water-mass and Region as categorical variables in addition to the continuous environmental variables. Temperature and salinity represent the surface values. Nitrate (NO<sub>3</sub><sup>-</sup>) and chlorophyll *a* (Chl *a*) median concentration calculated for samples within the euphotic zone. Analysis was conducted with the Adonis function of the vegan R package

### 342 **3.4. Division and class level taxonomic composition**

343 Dinoflagellate reads (syndiniales excluded) dominated the sequencing datasets from samples taken in the  
344 euphotic zone (34% of total - sequencing depth-normalized – reads), with Chlorophyta accounting for  
345 27%. Ochrophyta, constituted mainly by *Bacillariophyta* (7%) and *Pelagophyceae*(3%) and *haptophytes*  
346 belonging to *Prymnesiophyceae* class(5%) were the other most important phytoplankton divisions, while  
347 Stramenopiles\_X (mainly through Marine Stramenopiles, MASTs, 4%) Radiolaria (4%), and Ciliophora  
348 (3%) contributed most among the heterotrophic protist. Although such groups were consistently dominant,  
349 their relative contributions and particularly, their composition at class (Figure 5 and Figure 6) and finer  
350 taxonomic resolution (see subsection 3.5.) varied between water masses.

351 For STW samples for instance, where dinoflagellates and Chlorophyta co-dominated the overall  
352 dataset (30% of sequences each), followed by Ochrophyta (10%) with Haptophyta, Stramenopiles\_X and  
353 Radiolaria accounting for a lower percentage of metabarcodes (7% each). *Mamiellophyceae* accounted

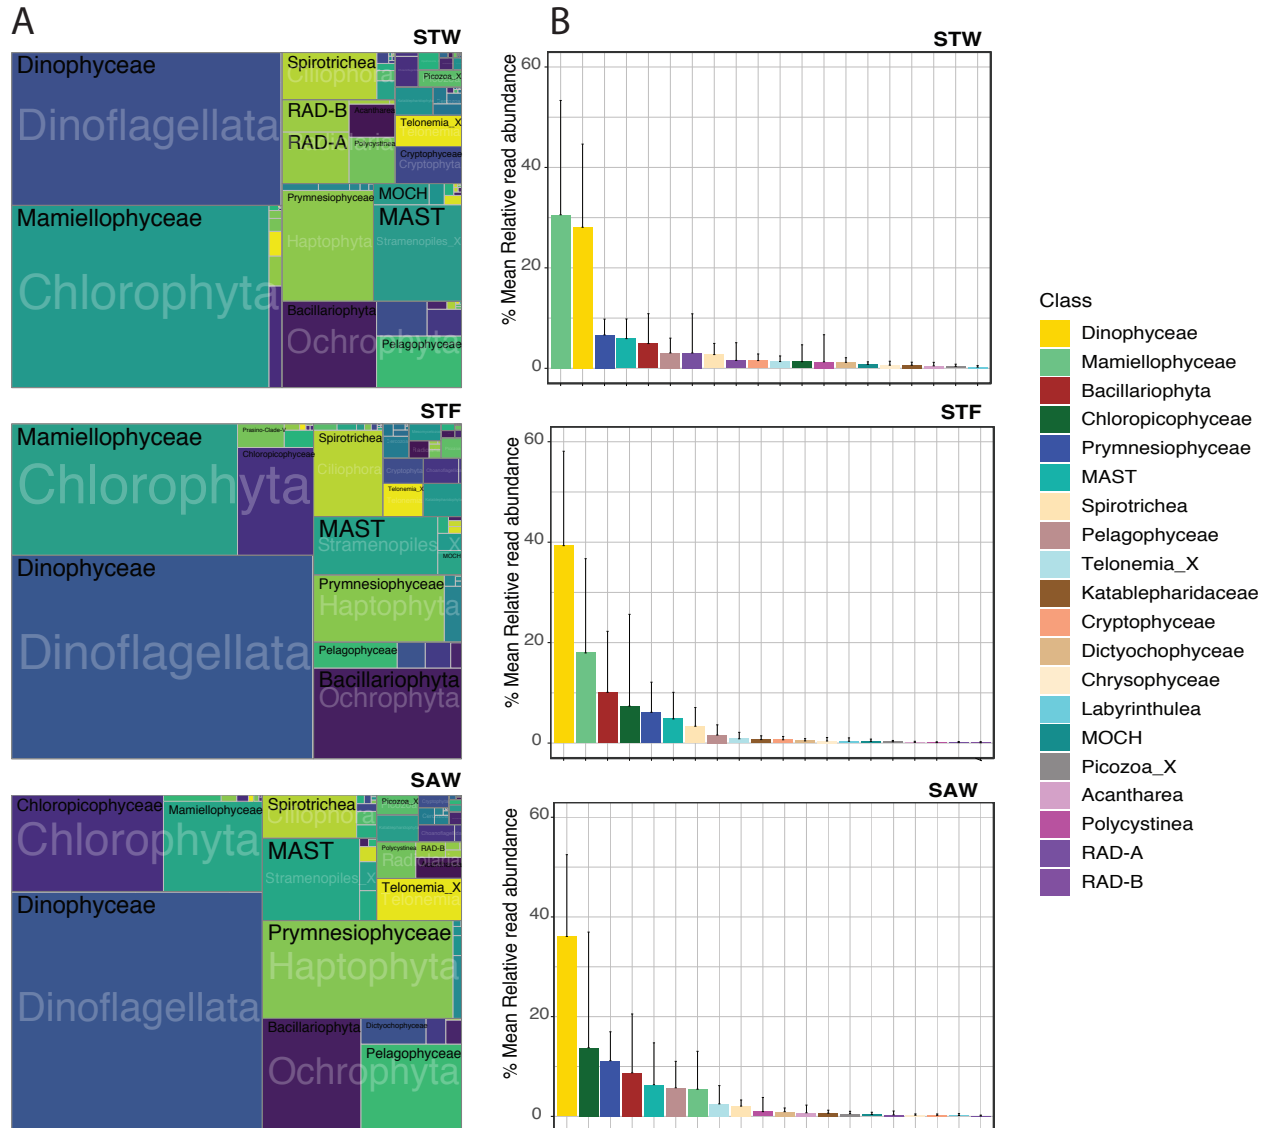

**Figure 5.** Protist community composition at division/class level (syndiniales excluded) in the euphotic zone of STW, STF and SAW. A) The area of each taxonomic group in the treemap represents the read abundances affiliated to each group standardized to the median sequencing depth across samples [ $\text{median sum otus} * (\text{otu reads} / \text{sum (otu reads)})$ ]. B) Barplots represent the mean relative read abundance of most abundant classes across different water masses (error bars are the standard deviation of the mean).

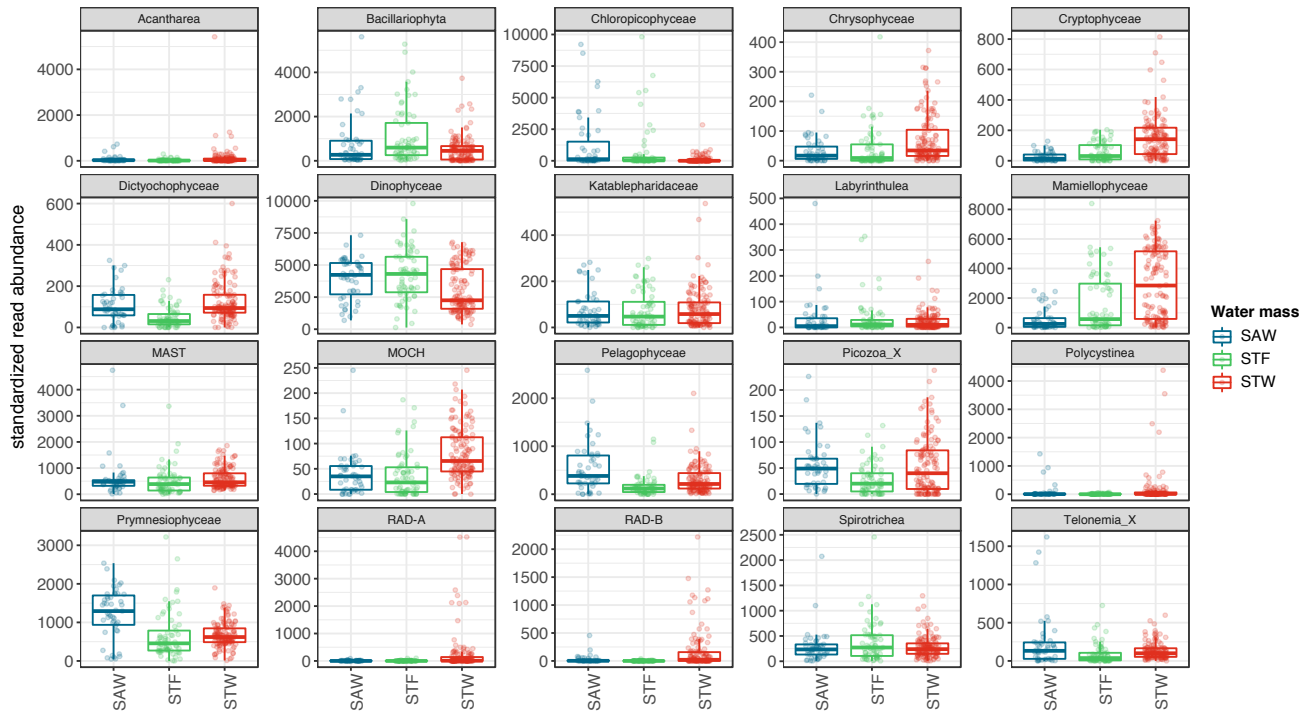

**Figure 6.** Box-plots showing standardized read abundance in subtropical, subantarctic and subtropical front of the twentieth most abundant protist classes in the euphotic zone. Box-plots show the median, the first and third quartiles (lower and upper hinges) and the values within the  $\pm 1.5 * IQR$  (IQR, interquartile range) (line). Points represent values of single samples.

354 for the vast majority of reads affiliated to Chlorophyta (>95%) while *Chloropicophyceae* represented  
 355 only a minor fraction of sequences affiliated to this division (Figure 5). *Prymnesiophyceae* was the  
 356 most abundant class of Haptophyta (6%). *Bacillariophyta* (5%) and *Pelagophyceae* (3% each) classes  
 357 dominated over *Dictyochophyceae* (1%) and *Chrysophyceae* (1%) among Ochrophyta, while *Cryptophyceae*  
 358 (*Cryptophyta*, 2%) accounted for a relatively larger percentage. The class Among Heterotrophic groups  
 359 MASTs (*Stramenopile\_X*, 5%), RAD-A (*Radiolaria*, 3%) and ciliates of the class *Spirotrichea* contributed  
 360 most to the STW metabarcoding data (Figure 5 and Figure 6).

361 The SAW sequencing dataset was clearly dominated by dinoflagellates (37% total reads), followed  
 362 by Chlorophyta (18%), Ochrophyta (15%) and Haptophyta (12%) with a more even share of the total  
 363 number of reads compared to STW (Figure 5). At class level, *Chloropicophyceae* (14%), was clearly the  
 364 most abundant group of green algae followed by *Prymnesiophyceae* (12%), *Bacillariophyta* (8%) and  
 365 *Pelagophyceae* (6%) phytoplankton classes (Figure 5). The heterotrophic component in the SAW metabar-

366 coding data was dominated by MASTs (6%) followed by ciliates (3%) while the relative contribution  
367 of Radiolaria in the euphotic zone was minor (<0.5%) and mainly attributed to Polycystinea rather than  
368 RAD-A &-B classes (Figure 5 and Figure 6).

369 The STF protist metabarcoding data presented intermediate characteristics between STW and SAW  
370 (Figure 5). As in SAW, dinoflagellates (39%) dominated the data although the contribution of Chlorophyta  
371 (26%) was on average higher and closer to levels found in the STW metabarcoding dataset. Accordingly,  
372 *Mamiellophyceae* was the second most abundant class of green algae (17%), although the contributions  
373 of *Chloropicophyceae* (10%), and *Pyramimonadophyceae* (1.5%) were also substantial. The division  
374 Ochrophyta (12%) accounted for a similar fraction of phytoplankton reads as in STW and SAW, but in STF  
375 the phytoplankton community was clearly dominated by *Bacillariophyta* (10%) with minor contributions  
376 from *Pelagophyceae* (2%) and *Dictyochophyceae* (0.5%) classes. The heterotrophic component was  
377 dominated by MASTs (5%) and ciliates (4%) while the contribution of Radiolaria (<0.2%) was on average  
378 lower than in STW and SAW datasets (Figure 5 and Figure 6).

379 To investigate protist community composition below the euphotic zone we used the Bio-physical  
380 moorings dataset that covered systematically the entire water column at the Bio-STM and Bio-SAM  
381 (0-3100 and 0-2800 m, respectively) sites and the Bio-STF site on the Chatham Rise crest (0-350 m)(n  
382 = 113 samples). Overall, Radiolaria (Polycystinea) dominated the aphotic metabarcoding data (52% of  
383 protist reads) followed by dinoflagellates (27%). Heterotrophic groups such as MASTs (3%) and ciliates  
384 (3%) contributing substantially less (Figure 7 and Figure S8). Phytoplankton groups such as diatoms,  
385 green algae, and prymnesiophytes contributed at similar levels (3% each), likely reflecting mixing layers  
386 extending below the euphotic zone. The relative contribution of Radiolaria was similar in SAW (57%) and  
387 STW (50%) samples but much lower in the STF samples (35%) where together with dinoflagellates (36%)  
388 they co-dominated protistan reads below the euphotic zone (Figure 7 and Figure S8). Among Radiolaria,  
389 Polycystinea class, mainly through the Spumellarida order, was most abundant (25-35% of total reads)  
390 although Acantharea (10%), RAD-B (8%) and to a lesser extent RAD-A (1%) classes also contributed to  
391 the dominance of this group (Figure 7 and Figure S8).

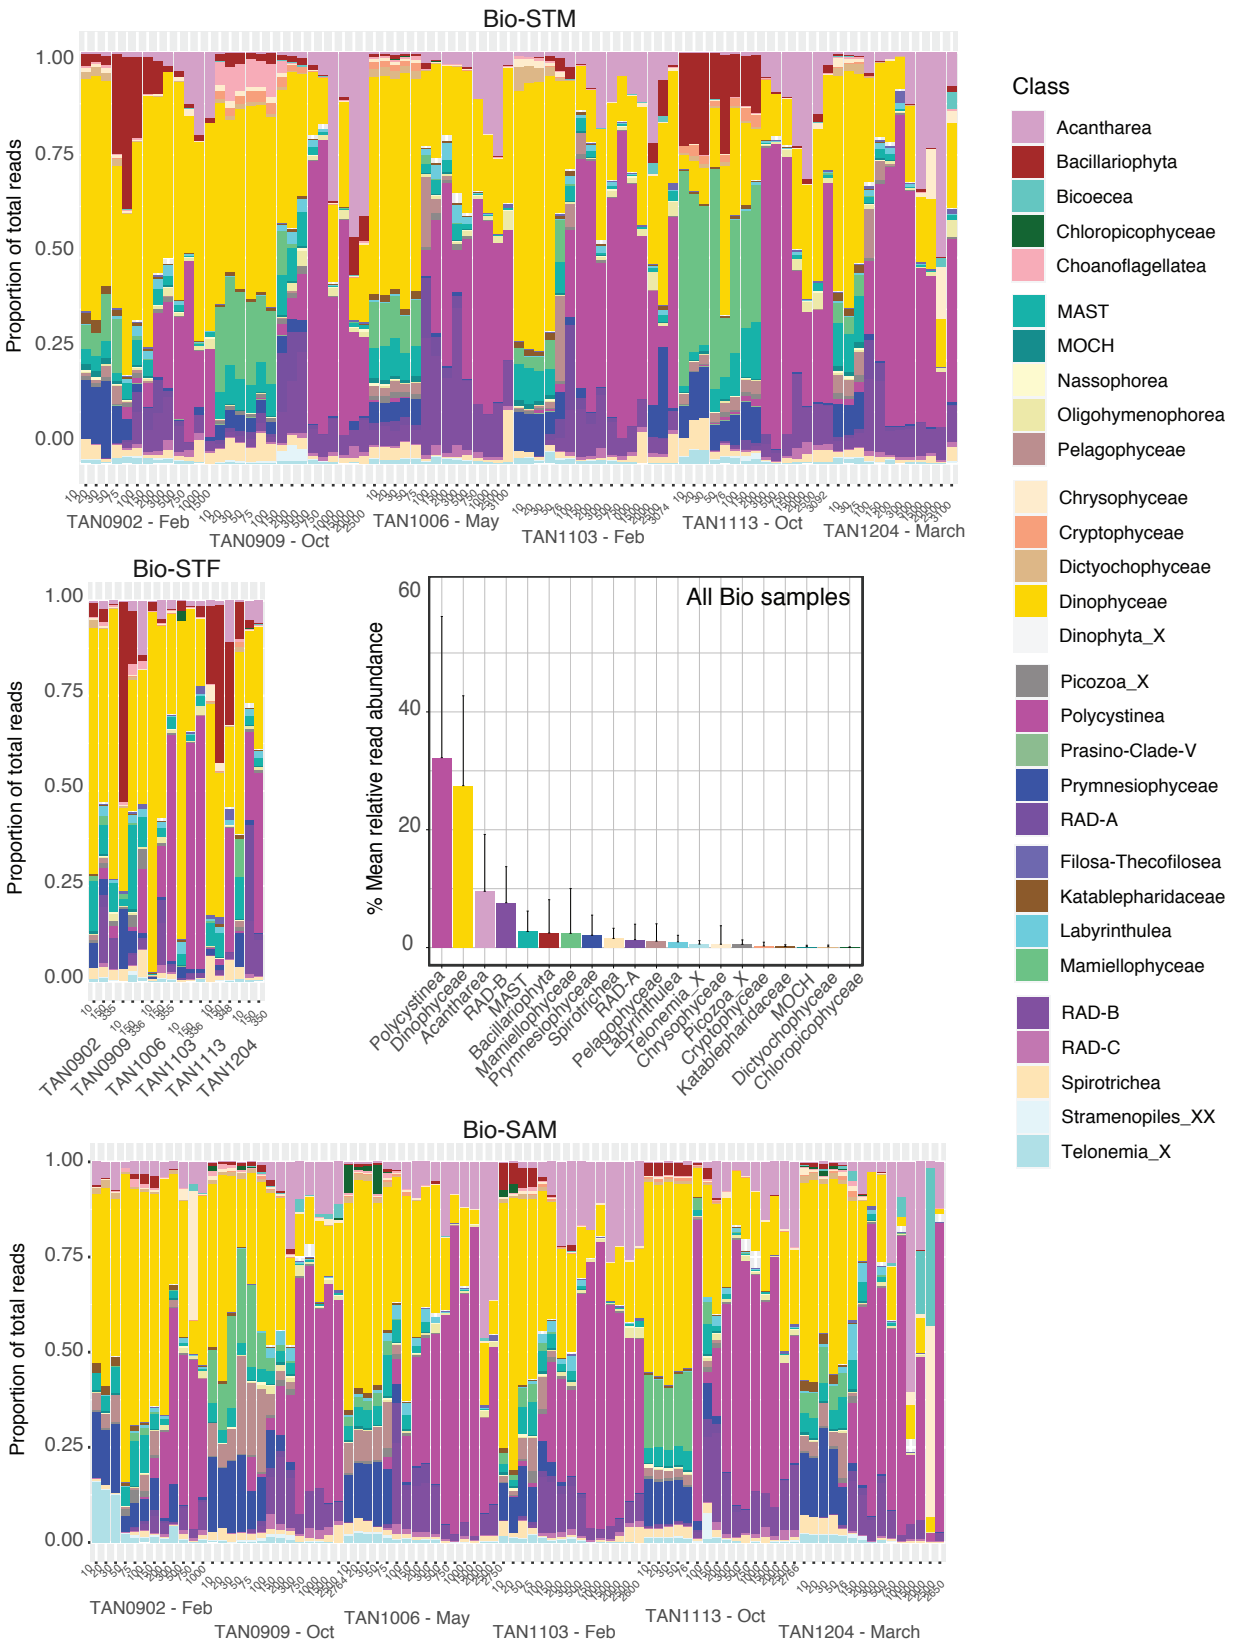

**Figure 7.** Relative read abundance of main protistan classes in samples collected throughout the water column (0-2000 m) during multiple voyages to the Biophysical Mooring program sites in STW (Bio-STM), STF (Bio-STF) and SAW (Bio-SAM) and mean contribution for the whole sampling program (n = 113)(error bars as in Figure 4. 24/20



392 Vertically, the dominance of Radiolaria became more prominent in the mesopelagic and bathypelagic  
393 samples where they often represented >75% of total reads (Figure 7). Polycystinea class tended to  
394 dominate across all sample depths, with increasing abundance at depths >300 m. Sequences affiliated  
395 with Acantharea and RAD-B showed similar abundance but followed opposite vertical distributional  
396 trends, with RAD-B being more abundant in shallower samples (100-500 m) while Acantharea abundance  
397 increased with depth and peaked in bathypelagic samples (>1000 m) (Figure 7).

### 398 **3.5. Genus and species community composition**

399 Species composition also varied among the metabarcodes from the physically and biogeochemically  
400 distinct water masses (Figure 8, Figure 9). In STW, the green algae (Chlorophyta) was dominated by the  
401 species *Ostreococcus lucimarinus* followed by *Bathycoccus prasinus*. These *Mamiellophyceae* species  
402 together with *Micromonas commoda* and other *Micromonas* species (*M. bravo* I, II, and *M. pusilla*)  
403 accounted for the majority of the sequences affiliated to green algae in the euphotic zone of STW (Figure 8,  
404 Figure S9 and Figure S10). Reads affiliated to several dinoflagellate species such as *Gymnodinium*  
405 sp., *Heterocapsa rotundata* and *Gyrodinium spp.* were among the most abundant in STW dataset.  
406 *Gymnodinium* sp., and *H. rotundata* were more abundant at the Bio-STM whereas *Gyrodinium helveticum*  
407 was prevalent in STW of the EAUC surveyed during the Cross-shelf Exchange voyage (Figure S10).  
408 Diatom ASVs identified as Polar-centric Mediophyceae\_X sp. and *Minidiscus trioculatus* were the most  
409 abundant diatoms reads in STW metabarcodes, particularly in the Spring Bloom II voyage. Among  
410 ASVs assigned to pelagophytes, an unidentified Pelagophyceae\_XXX\_sp. (ASV\_0058) and *Pelagomonas*  
411 *calceolata* ASVs were the most abundant ones (Figure 8, Figure S10 and Figure S9). Among the class  
412 *Prymnesiophyceae*, *Phaeocystis globosa* (ASV\_0065) was the most abundant ASV (Figure 8) with several  
413 ASVs belonging to *Gephyrocapsa oceanica* and *Chrysochromulina* spp. mainly contributing to the overall  
414 dominance of the latter genus within the class (Figure S9, Figure S10).

415 Among the STF metabarcodes, the Mamiellophyceae *O. lucimarinus* was also the most abundant  
416 species overall, although the relative contribution of *Chloroparvula pacifica* (asv\_0014, *Chloropico-*  
417 *phyceae*) increased substantially compared to STW (Figure 8, Figure S9). It is worth noting the high  
418 abundance of sequences affiliated to *Chloropicon sierburthii* in addition to *Chloroparvula pacifica*, which

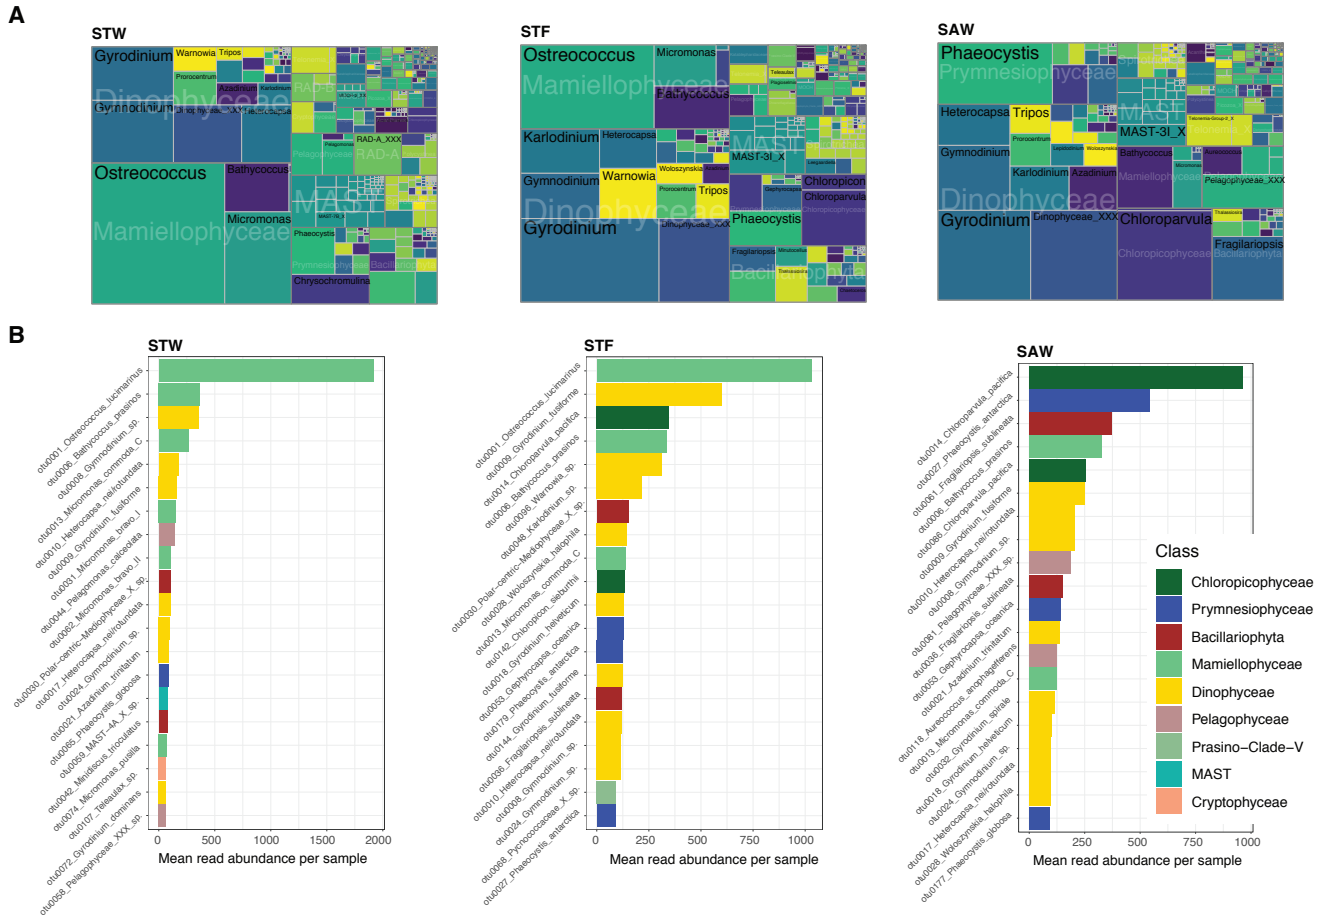

**Figure 8.** Water mass genus and species abundance (A) Treemaps showing the community composition at class/genus level in the euphotic zone of the STW, STF and SAW. The area of taxonomic group is proportional to the read abundances affiliated to each group standardized to the median sequencing depth across samples [ $\text{median sum otu} * (\text{otu reads} / \text{sum (otu reads)})$ ]. (B) Mean standardized read abundance of most abundant ASVs and assigned species, color coded for their class affiliation, in the euphotic zone of the different water masses.

419 contributed to the overall increase in the relative abundance of *Chloropicophyceae* in the STF dataset  
420 (Figure 8, Figure S9). Reads assigned to the heterotrophic dinoflagellate *Gyrodinium fusiforme* was the  
421 second most abundant in STF samples, with other ASVs affiliated with *Warnowia* sp. and *Karlodinium*  
422 sp. appearing among the most abundant dinoflagellate species (Figure 8, Figure 9 and Figure S9). The  
423 higher relative abundance of Bacillariophyta observed in STF was mainly driven by ASVs affiliated to  
424 unidentified Polar-centric Mediophyceae species and *Fragilariopsis sublineata* (Figure 8 and Figure S9)  
425 which tended to be more abundant in the STFZ of the Chatham Rise region (TAN1516) and the S-STF  
426 flowing north of C. Plateau (TAN1702), respectively (Figure S10). The identification of *F. sublineata*  
427 should be taken with caution the V4 region of the two sequences included in PR2 is 100% similar to the  
428 annotated sequence of *Fragilariopsis Kerguelensis* present in PR2 making impossible to unambiguously  
429 assign that ASVs to one of this two species. To reflect this ambiguity the ASVs assigned to *F. sublineata*  
430 in PR2 are referred as *F. sublineata/kerguelensis* throughout the text (see discussion). Among *Prymnesio-*  
431 *phyceae*, *Phaeocystis* spp. was the dominant genus but most reads in this case belonged to *P. antarctica*  
432 instead of *P. globosa* (Figure 8, Figure S9). ASVs assigned to the prymnesiophyte *G. oceanica* also  
433 increased substantially in STF compared to STW datasets. *Pelagophyceae* in the STF metabarcodes was  
434 dominated by *Aureococcus* and *Pelagococcus* spp. (Figure S9) by although the class relative contribution  
435 was relatively low (Figure 5). The relative abundance of *Cryptophyceae* and *Dictyophyceae* remained  
436 minor overall (<2%) (Figure 5), but both groups showed changes in their specific composition across  
437 the water masses metabarcode datasets. Among *Cryptophyceae*, *Plagioselmis prolunga* and *Teleaulax*  
438 *gracilis* increased substantially from STW to STF samples while the relative contribution of sequences  
439 assigned to *Teleaulax* sp. decreased. Changes within *Dictyophyceae* were less substantial but showed an  
440 increase in the relative abundance of *Dictyocha speculum* and *Pseudochattonella farcimen* from STW to  
441 STF metabarcodes (Figure S9).

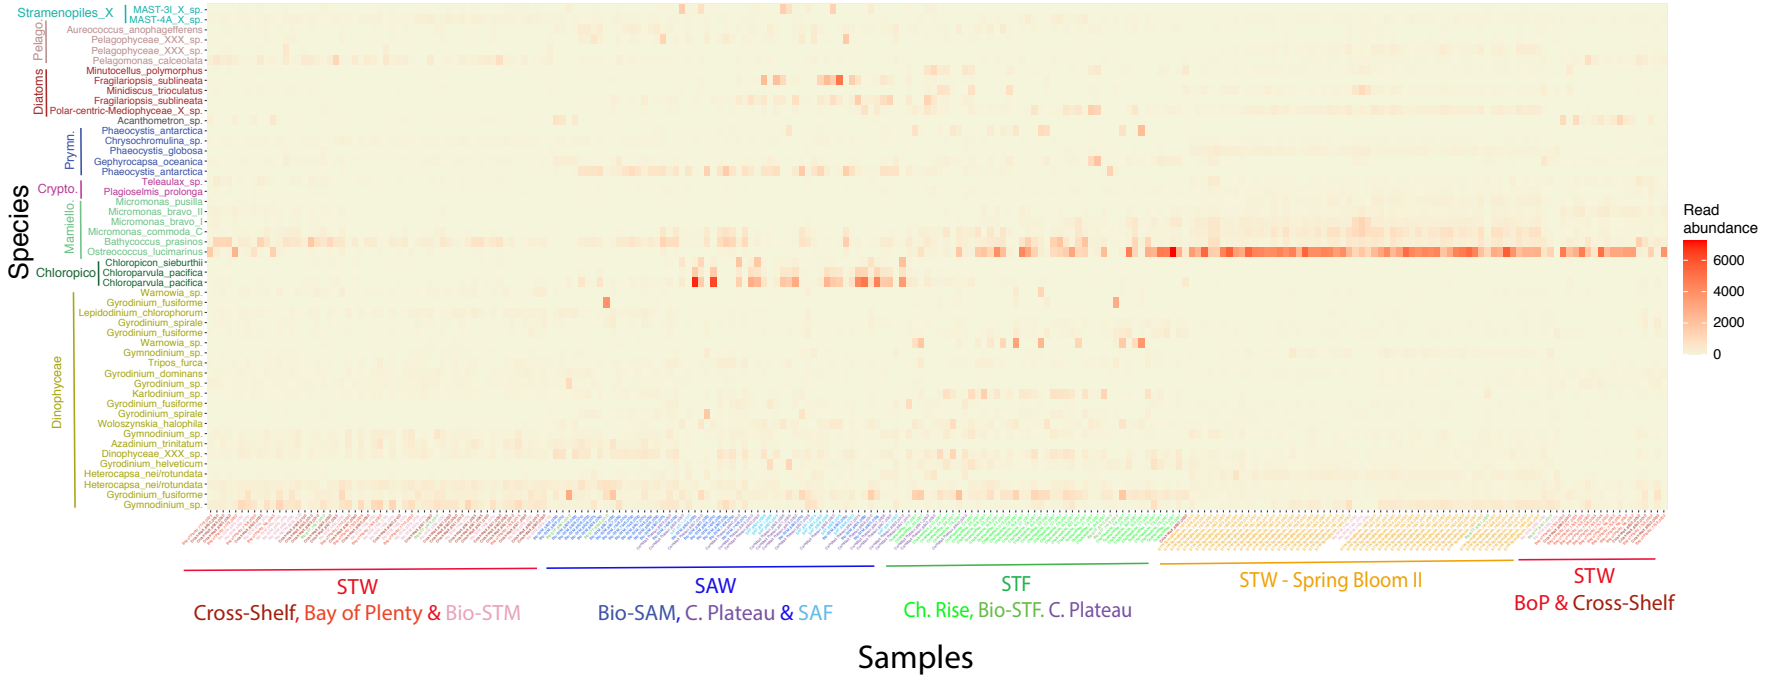

**Figure 9.** Heatmap showing the standardized read abundance of the 50 most abundant species (Y-axis) across samples collected in the euphotic zone (X-axis). Samples were clustered using nMDS and Jaccard distance and sample labels color coded according to the water mass and region they were collected from. Species were organized and color coded by class affiliation.

442 Among SAW samples, *Chloropicophyceae* ASV\_0014 assigned to *Chloroparvula pacifica* was the  
443 most abundant taxa, with other ASVs of this species (e.g., asv\_0086) contributing also to the dominance  
444 of this class over Mamiellophyceae in SAW (Figure 8, Figure 9, Figure S9). Among Mamiellophyceae,  
445 reads from *B. prasinos* became the most abundant followed by *M. commoda* while the contribution of *O.*  
446 *lucimarinus* in SAW samples was minor (Figure 8 and Figure S9). The increase in the relative abundance  
447 of Prymnesiophyceae reads observed in SAW samples was driven mainly by *Phaeocystis* spp., with  
448 *P. antarctica* emerging as the second most abundant species in SAW metabarcodes (Figure 8). Other  
449 *Phaeocystis* species (*P. globosa*, *P. cordata* and *Phaeocystis* spp.) contributed also to the dominance of this  
450 genus within prymnesiophytes (Figure S9 and Figure S10). Among Bacillariophyta, ASVs assigned to *F.*  
451 *sublineata/keruelensis* (ASVs 0061 and 0036) were the dominant in SAW samples (Figure 8 and Figure 9)  
452 while *Thalassiosira* sp., Polar-centric Mediophyceae sp. and other diatom genus contributed substantially  
453 less (Figure S9 and Figure S10). Increasing abundance of pelagophyte reads in SAW (Figure 5) was  
454 mainly due to *Pelagophyceae*\_XXX\_sp (ASV\_0081), the same ASV that dominated in STW samples,  
455 and to *Aureococcus anophagefferens* which were among the most abundant taxa in SAW metabarcodes  
456 (Figure 8 and Figure S9).

457 To investigate how the relative abundance of the species identified varied between the water masses,  
458 we ran a differential gene expression analysis based on the negative binomial distribution (DESeq) using  
459 water mass as a categorical variable. For the euphotic zone, this yielded 70 and 35 ASVs out of 3984  
460 ASVs that were significantly more or less abundant (p-value < 0.01) in STW compared to SAW datasets,  
461 respectively (Figure S11A). Species that showed greatest differences (>10 log<sub>2</sub>-fold changes) in their  
462 relative abundance were not necessarily among the most abundant species in each water mass. Among the  
463 species associated with STW, we found the larger changes in relative abundance in the diatoms ASVs  
464 assigned to Polar-centric Mediophyceae, *Minutocellus polymorphus*, and *Minidiscus trioculatus*; the  
465 prasinophytes *O. lucimarinus* and several *Micromonas* species; the prymnesiophytes *Phaeocystis globosa*  
466 and *Chrysochromulina* sp., and dinoflagellates *Warnovia* sp., *H. rotundata* and number of other species  
467 (Figure S11). Among species with preferences for SAW we found several diatom species including *F.*  
468 *sublineata* and *Cylindrotheca closterium*, the prasinophyte *B. prasinos*, the pelagophytes *Pelagococcus* sp.  
469 and *A. anophagefferens*, and several dinoflagellates including the heterotrophic species *G. fusiforme* and

470 *G. spirale* and mixoplankton *Karlodinium veneficum* (Figure S11).

471 Different ASVs affiliated to the same species often showed distinct preference for STW and SAW.  
472 Most abundant *Chloroparvula pacifica* ASVs (e.g. asv\_0086 and asv\_0014, Figure 8) were associated  
473 with SAW, while less abundant ASVs (e.g. asv\_0532 and asv\_0336) were more associated with STW (  
474 Figure S11A). Similarly, most abundant ASVs of *P. antarctica* (asv\_0011, asv\_0027) showed preference  
475 for SAW (10-30-log<sub>2</sub> fold negative change) while much less abundant asv\_0218 showed greater affinity  
476 for STW. This intraspecific variability was observed within unidentified species (e.g. Dinophyceae\_XXX\_  
477 sp. and Pelagophyceae\_XXX\_sp.) which included ASVs with opposite affinities for STW and SAW (  
478 Figure S11A).

479 DESeq analysis between the STF and STW also depicted specific differences as observed between  
480 STW and SAW, with some additional diatoms ASVs assigned to *Thalassiosira* sp. and *Pseudo-nitzschia*  
481 *delicatissima* enriched in the STF dataset (Figure S11B). In most cases, the distinctive species pattern  
482 observed between the STF and either STW or SAW metabarcodes coincided with those identified from  
483 the comparison between STW and SAW described above (Figure S11B). For instance, ASVs of Polar-  
484 centric Mediophyceae species found in higher abundance in STW compared to SAW, were also associated  
485 preferentially with STF compared to SAW while *F. sublineata*, and *C. closterium* diatoms ASVs, that were  
486 enriched in SAW compared to STW, were also preferentially associated with the STF rather than STW  
487 (Figure S11B). Only few ASVs, such as those assigned to the prasinophyte *Chloropicon sieburthii* and  
488 dinoflagellate *Gonyaulax* sp., were distinctively associated with STF waters (Figure S11C).

489 The most abundant reads found below the euphotic zone belong to the polycystinean order Spumellarida  
490 Group I family (Figure S8). Several ASVs contributed to the dominance of Spumellarida Group I family,  
491 but different ASVs dominated in each water mass dataset ( Figure S12 and (Figure S13). ASV0023 and  
492 ASV0039 affiliated with the Group I family of Spumellarida dominated in SAW, while ASV0064 and  
493 ASV0085 were most abundant in STF (Figure S13). Conversely, most abundant radiolarian species in  
494 STW were unidentified species assigned to the acantharean order Chaucanthida (Figure S13). Several  
495 less abundant Radiolaria ASVs showed significantly different abundances across the aphotic depth layers  
496 of different water masses suggesting differences in their ecological preferences (Figure S14). Reads  
497 assigned to known photosynthetic species also showed differential abundance below the euphotic zone

498 in the different water masses datasets. Most notably the higher abundance of reads affiliated to the  
499 *Mamiellophyceae* *O. lucimarinus* and the *Prymnesiophyceae* *P. globose* in STW compared to SAW yielded  
500 significant differences in their abundance below the euphotic zone as well. A pattern observed also for  
501 less prominent phytoplankton species like the diatom *Asterionellopsis glacialis* or *Thalassiosira rotula*  
502 that despite being less abundant in the euphotic zone yielded significant differences in their abundance  
503 below the euphotic zone.

## 504 **4. DISCUSSION**

505 The taxonomic composition of protistan communities in SAW and STW in the SW Pacific and across  
506 the main frontal zones of the region (STF, SAF) has not been extensively characterized. Previous  
507 studies have typically focused on phytoplankton communities and their variability across SA and ST  
508 waters flanking the STFZ over the Chatham Rise (Chang and Gall 1998; Delizo et al. 2007; Hall et al.  
509 1999) but broader biogeographic studies in the SW Pacific are scarce (DiTullio et al. 2003). By using DNA  
510 metabarcoding, we provide a comprehensive taxonomic characterization of the protistan communities  
511 associated with STW and SAW at southern temperate latitudes. Although samples included in this study  
512 were collected in different seasons, the seasonal coverage was similar for STW and SAW (Table 1 and  
513 Figure S1), allowing a meaningful comparison among the microbial communities associated with these  
514 water masses throughout an average year.

### 515 **4.1. Protistan community structure in STW and SAW of the southwest Pacific**

516 Species richness decreased latitudinally and with temperature (Figure S4 and Figure S5) as expected from  
517 global diversity patterns observed and modelled for marine bacterial and phytoplankton communities  
518 (Barton et al. 2010; Fuhrman et al. 2008; Ibarbalz et al. 2019) as well as from previous DNA-based reports  
519 in the SW Pacific region (Raes et al. 2018). Consistent with this trend, species richness was higher in  
520 warmer STW than in SAW while lowest diversity was associated with the STF (Figure 3).

521 The relative low diversity observed in the STF could be related to the increased phytoplankton biomass  
522 and productivity typically associated with the STF across the annual cycle (Murphy et al. 2001; Pinkerton  
523 et al. 2005) and the dominance of fewer ‘bloom-forming’ species in this highly productive zone (Chang

524 and Gall 1998). The fact that species richness within STW was lowest during the more productive spring  
525 bloom conditions (TAN1212) is consistent with the view that more productive waters such as found in the  
526 STF, during the spring bloom, and locally on the Campbell Plateau (Gutiérrez-Rodríguez et al. 2020) tend  
527 to decrease protistan diversity. However, the lower diversity associated with STF, relative to STW and SAW,  
528 was systematically observed across the different levels of nitrate and Chl *a* concentrations encompassed in  
529 this study (Figure S6) suggesting that other factors may contribute to this pattern. Interestingly, the lower  
530 diversity in the STF relative to STW and SAW was buffered below the euphotic zone (Figure 3C). Similarly,  
531 the temperature-driven latitudinal pattern described globally for epipelagic plankton also disappeared  
532 below the euphotic zone (Ibarbalz et al. 2019). The decoupling between the diversity patterns in the sunlit  
533 and dark ocean suggested by these results are somewhat contrary to the connectivity between the epi-  
534 and bathypelagic zones as inferred by the high correspondence of bacterial communities and processes  
535 between these realms (Mestre et al. 2018; Ruiz-Gonzalez et al. 2020). The reasons for these differences  
536 are unclear and highlight the need of further studying ecological processes that shape microbial diversity  
537 throughout the entire water column.

538 Despite the regional and seasonal variability encompassed within both STW and SAW (Table 1,  
539 Figure 2) we observed systematic differences in the taxonomic composition associated with these water  
540 masses (Figure 4). Such water-mass specificity has been previously observed for the prokaryotic (Agogué  
541 et al. 2011; Galand et al. 2010; Seymour et al. 2012; Techtmann et al. 2015) and eukaryotic components  
542 (Hamilton et al. 2008; Raes et al. 2018) of microbial communities across different oceans. Among  
543 environmental drivers, salinity rather than temperature or nitrate concentration was the physico-chemical  
544 variable that explained best the compositional (dis-)similarities among euphotic samples (Figure 4,  
545 Figure S7). Bray-Curtis dissimilarity indices of surface bacterial communities across the Southland  
546 Current was also strongly correlated with salinity (Baltar et al. 2016). These results support the view  
547 that STW and SAW east of New Zealand are better conceptualized as bioregions or provinces rather than  
548 habitats *sensu* (*sensu* Martiny et al. 2006), where (phyto)plankton communities reflect oceanographic  
549 processes and history in addition to contemporary physico-chemical conditions.

550 Samples from the STF itself were also distinguished from those in SAW and STW based on their  
551 taxonomic composition, although they showed a greater overlap (Figure 4) that reflected the active mixing



552 and transition nature of such frontal zones. This overlap was particularly evident between samples  
553 collected at the Bio-STF and Bio-SAM sites located on the Chatham Rise and its subantarctic flank,  
554 respectively, and between the S-STF and SAW over the Campbell Plateau, which suggests a stronger  
555 physical connectivity and ecological affinity of the STF with SAW than STW. Similarly, the horizontal  
556 mixing and phytoplankton community size structure in the STF zone has been reported to be more tightly  
557 coupled across SAW-influenced than STW-influenced water types (Safi et al., submitted). Nevertheless,  
558 the distinct protistan communities observed in STW and SAW, and to a lesser degree in the STF, highlights  
559 the role of oceanographic features such as the STF as boundaries that influence the diversity of oceanic  
560 microbial communities in large oceanic provinces (Baltar et al. 2016; Raes et al. 2018).

## 561 **4.2. Taxonomic composition of phytoplankton community**

562 Our results showed the overall dominance of dinoflagellates and Chlorophyta across all water masses,  
563 followed by Bacillariophyta, *Prymnesiophyceae* and *Pelagophyceae* (Figure 5). Yet consistent differences  
564 in the relative contribution of these taxonomic groups between water masses emerged at class and species  
565 taxonomic classification levels (Figure 6, Figure 8, Figure S9). Analysis of intra-specific diversity revealed  
566 differences in the distribution of ASVs of the same species suggesting the presence of different ecotypes in  
567 some cases (e.g. *Chloroparvula pacifica*, *P. antarctica*) and current taxonomic gaps within certain groups  
568 that remain to be characterized (e.g. *Pelagophyceae*\_XXX; *Dinophyceae*\_XXX) (Figure S11). Below we  
569 discuss the distributional patterns of major taxonomic groups, highlighting different taxonomic ranks to  
570 shed some light on their ecological preferences.

### 571 **4.3.3. Chlorophyta (Green algae)**

572 The relative contribution of the two main green algae classes, *Mamiellophyceae* and *Chloropicophyceae*,  
573 showed opposite distribution patterns (Figure 5). *Mamiellophyceae* was the most abundant class in STW  
574 and constituted the bulk of green algae that dominated these waters samples, while its relative abundance  
575 decreased across the STF to reach lowest levels in SAW (Figure 6). Picoplanktonic algae *O. lucimarinus*  
576 was clearly the most abundant species in STW and STF (Figure 8, Figure 9) in agreement with a previous  
577 metabarcoding analysis conducted across the Southland Current (Allen et al. 2020) where this species  
578 abundance peaked in neritic STW inshore of the main current core and decreased towards SAW end of the

579 coast-offshore sampling transect (Allen et al. 2020). *O. lucimarinus* was also among the most abundant  
580 species of *Mamiellophyceae* in a 18S rRNA metabarcoding survey conducted on coastal waters globally  
581 (Tragin and Vaultot 2019).

582 The dominance of picoplanktonic *Mamiellophyceae* in STW is consistent with the greater contribution  
583 of  $<2 \mu\text{m}$  Chl *a* (80%,) observed in this water mass ( Figure S4). It is worth noting that the highest  
584 abundance of this group was observed during the onset of the Spring bloom samples (TAN1212, Figure S10)  
585 when *Mamiellophyceae* accounted for 40-75% of 18S rRNA reads, while diatom contributions remained  
586 around 10% over the 3-weeks of sampling ( Figure S15). Among the multiple surveys of the Bio-STM  
587 site, *Mamiellophyceae* contribution tended to be highest during early spring coinciding with the onset of  
588 the spring bloom (Figure 7). *Mamiellophyceae* and *O. lucimarinus* were the most abundant phytoplankton  
589 class and species in the STF samples along the Chatham Rise (TAN1516, Figure S15 and Fig. S10)  
590 particularly on the STW influenced northern flank of the rise (Figure S16). The abundance and presence  
591 of some prasinophyte classes, including *Mamiellophyceae*, have often been assessed from their diagnostic  
592 pigment prasinoxanthin. Quantitative application of pigment-based approaches showed that prasinophytes  
593 dominated the community in the STFZ and its subtropical flank across the Chatham Rise (170 °E) (Delizo  
594 et al. 2007) and further east (170°W) (DiTullio et al. 2003), in agreement with our DNA based results.  
595 In the Indian sector of the SO, a latitudinal study also found the highest contribution of prasinophytes  
596 associated with the STF (Iida and Odate 2014). Broader application of pigment approaches have revealed  
597 that prasinophytes can contribute substantially to vernal blooms at temperate latitudes (Bustillos-Guzman  
598 et al. 1995; Gutiérrez-Rodríguez et al. 2011; Latasa et al. 2010; Nunes et al. 2018). High abundance of  
599 several species of prasinophytes including *Ostreococcus* spp. and *Micromonas* spp. have been recently  
600 reported during the onset of the North Atlantic spring bloom from 16S rRNA amplicon sequencing analysis  
601 (Bolaños et al. 2020) and at more temperate latitudes of the Eastern North Atlantic using 18S rRNA  
602 metabarcoding (Joglar et al. 2021). The deep mixing layers ( $>100$  m) during the New Zealand STW  
603 spring bloom II voyage (TAN1212) (Chiswell et al. 2019), where prasinophytes dominated, supports the  
604 idea that this picophytoplankton group thrives under high-nutrient, high-mixing conditions playing an  
605 important role in the development of spring blooms, characteristic of temperate latitudes. Overall, our  
606 results highlight the wide ecological breadth of *Mamiellophyceae* and certain species like *O. lucimarinus*

607 which tend to dominate across a wide range of physical, chemical and trophic conditions encountered  
608 within STW.

609 *Chloropicophyceae* (previously defined as Prasinophytes clade VII, Lopes dos Santos et al. 2017a)  
610 showed an opposite trend to *Mamiellophyceae*, with the highest relative abundance associated with SAW  
611 samples (Figure 5 and Figure 6). Culture representatives of *Chloropicophyceae* and 18S rRNA sequences  
612 have been obtained from tropical and subtropical latitudes of the north and south Pacific (Lopes dos Santos  
613 et al. 2017a,b; Tragin and Vaultot 2018) but to our knowledge this is the first report of their presence  
614 and high abundance in subantarctic waters. The majority of *Chloropicophyceae* reads were assigned  
615 to a reference sequence corresponding to *Chloroparvula pacifica* and included several ASVs one of  
616 which (ASV0014) was the most abundant protist ASV found in SAW (Figure 8). *Chloropicophyceae*  
617 has been suggested as the dominant group of green algae in meso- and oligotrophic oceanic waters in  
618 contrast with the preference of *Mamiellophyceae* for more nutrient-rich coastal environments (Lopes  
619 dos Santos et al. 2017b; Shi et al. 2009; Tragin and Vaultot 2018). In this study, *Chloropicophyceae* were  
620 most abundant in SAW which are considered HNLC, suggesting that the preference of this group for  
621 meso-/oligotrophic conditions reported for typically macronutrient limited waters could also encompassed  
622 iron limited HNLC conditions. Furthermore, field experiments have suggested that phytoplankton growth  
623 in HNLC regions in the subarctic Pacific and the Southern Ocean is co-limited by B vitamins and iron  
624 micronutrients (Bertrand et al. 2007; Koch et al. 2011; Panzeca et al. 2006). Genome analysis of one  
625 species of *Chloropicophyceae* (*Chloropicon primus*) indicates that this group might be able to synthesize  
626 thiamine, in contrast to *Mamiellophyceae*, which depends on exogenous vitamin B1 or related precursors  
627 supplied by B1-synthesizing marine bacteria or other algae (Lemieux et al. 2019; Paerl et al. 2015). The  
628 potentially significant ecological role of B1 and B-vitamins, in general, in regulating and shaping the  
629 taxonomic composition of phytoplankton communities, is rarely considered and is still not well understood  
630 (Sañudo-Wilhelmy et al. 2014) but could contribute to explain the contrasting distribution patterns of both  
631 classes.

632 Although *Chloropicophyceae* abundance occasionally peaked in the Bounty Trough (Bio-SAM sam-  
633 ples) the high relative contribution of this group in SAW was mainly due to the high abundance systemati-  
634 cally observed on Campbell Plateau and the S-STF flowing north of the plateau (Figure 1, Figure S15,

635 Figure S16). In the S-STF, *Chloropicon sieburthii* made a substantial contribution in addition to the  
636 more dominant *Chloroparvula pacifica* (Figure S10). Whether this regional preference was linked to the  
637 bathymetric and hydrographic characteristics of the plateau (Forcén-Vázquez et al. 2021; Neil et al. 2004),  
638 the natural iron fertilization hypothesized for the region (Banse and English 1997; Gutiérrez-Rodríguez  
639 et al. 2020) or a combination of these and other aspects cannot be concluded from our study. Moreover,  
640 an ASV belonging to this genus was also found to contribute substantially to protistan communities in  
641 coastal waters of the California Current Ecosystem (Gutierrez-Rodriguez et al. 2019), highlighting the  
642 need of further studies to better understand the ecological drivers beyond coastal-oceanic trophic gradients  
643 responsible for the water mass preferences of such phytoplankton groups and species.

#### 644 4.3.4. *Dinophyceae (Dinoflagellates)*

645 Dinoflagellates relative abundance tended to be higher in SAW and the STF compared to STW metabar-  
646 codes (Figure 5, Figure 6), consistent with previous microscopy-based observations (Chang and Gall  
647 1998). ASVs affiliated to *Gyrodinium* genus and particularly *G. fusiforme* were identified as the most  
648 abundant species in agreement with a previous study in the Southland Current where DNA barcodes of  
649 *Karlodinium* and *Gymnodinium*, *Gyrodinium helveticum* and *G. spirale* were also retrieved and among  
650 the most abundant species (Allen et al. 2020). Many *Gyrodinium* species prey on bacteria and algae  
651 (Hansen 1992; Jang et al. 2019; Jeong et al. 2008). They can constitute an important component of  
652 microzooplankton biomass in coastal and oceanic environments (Jeong et al. 2010; Sherr and Sherr 2007)  
653 including high latitude waters (Archer et al. 1996; Olson and Strom 2002; Strom et al. 2001) where they  
654 have shown the capability of cropping down iron-stimulated diatom blooms (Saito et al. 2006). While  
655 species of *Gyrodinium* were prevalent across all water masses in our study, their abundance was higher in  
656 more productive STF waters (Figure 8, Figure S9), where higher Chl *a* concentrations was accompanied  
657 by increased abundance of diatoms and larger phytoplankton cells, confirming their pivotal importance in  
658 pelagic foodwebs as the link between primary producers and metazoan zooplankton (Zeldis and Décima  
659 2020).

#### 660 **4.3.5. Bacillariophyta (Diatoms)**

661 Diatoms tended to be more abundant in the STF metabarcodes compared to STW and SAW although  
662 relatively high contributions (>30%) were at times attained in all water masses (Figure 6, Figure 7). Most  
663 abundant ASVs in STF waters were identified as polar-centric Mediophyceae\_X sp., *Thalassiosira* sp.  
664 and *Fragilariopsis sublineata* (Figure 8, Figure S9), in the later case mainly due to their abundance in  
665 the southern STF flowing next to C. Plateau (Figure S10). Several diatom species including *F. sublin-*  
666 *eata/keruelensis*, *F. cylindrus*, *Chaetocerus peruvianus*, and *Cylindrotheca closterium* were significantly  
667 more abundant in the STF compared to STW, but not compared to SAW (Figure S11) supporting the  
668 greater resemblance of diatoms assemblage between STF and SAW.

669 In SAW, the most abundant diatom ASVs were identified as closely related to *F. sublineata/keruelensis*  
670 (Figure 8) consistent with the preference of *Fragilariopsis* species for SAW inferred from microscopy  
671 analysis (Chang and Gall 1998). *F. sublineata* has been reported to dominate in sea ice algal biomass and for  
672 being well adapted to low light conditions (McMinn et al. 2010); however it is seldom reported among the  
673 dominant species in Southern Ocean surface waters, where other species like *F. curta* and *F. keruelensis*  
674 tend to dominate (Mohan et al. 2011; Olguín and Alder 2011; Quéguiner et al. 1997) supporting the  
675 identification of ASVs assigned to *F. sublineata/F. keruelensis* in this study to *F. keruelensis*. However,  
676 the taxonomic assignment of the most abundant *F. sublineata/F. keruelensis* ASVs (e.g., asv\_0036, asv\_  
677 0061) were only closely related to referenced sequences in PR2 (the bootstrap value at species level  
678 assignment of ASVs <50%) and their sequence showed 5 to 7 mismatches with the annotated sequences  
679 (Figure S17) which highlights the intraspecific diversity of the *Fragilariopsis* spp. The low silicate  
680 characteristics of SAW east of New Zealand (Dugdale et al. 1995) is likely a key factor responsible for the  
681 southward increase of heavily silicified diatoms like *Fragilariopsis* spp. which tended to be lowest showed  
682 in the Bio-SAM, intermediate on C. Plateau and highest in southern most waters of the SAF (Figure S10)  
683 in a way consistent with their tendency to dominate south of the SAF (Assmy et al. 2013; Pinkernell and  
684 Beszteri 2014). Furthermore, the shift in the relative abundance of the dominant ASVs assigned to *F.*  
685 *sublineata/keruelensis* (ASV0036 and ASV0061) observed between subantarctic waters north (Bio-SAM,  
686 C. Plateau) and south of the SAF (SAF) (Figure S11, Figure S17) suggests potential differences in their  
687 silicate requirements for phytoplankton growth.

688 In STW, in addition to unidentified Polar-centric Mediophyceae\_X sp., other small species such as  
689 *Minidiscus trioculatus* and *Minutocellus polymorphus* were identified among the most abundant diatoms  
690 (Figure 8, Figure S9), consistent with the dominance of these small diatom taxa in neritic-modified STW  
691 of the upstream Southland Current (Allen et al. 2020). While most common genera reported in STW  
692 (and STF) by microscopy analysis (e.g. *Thalassiosira* spp., *Chaetoceros* spp., *Guinardia* spp.) were  
693 also detected by DNA metabarcoding, the small nano-sized species revealed as numerically dominant  
694 by DNA approaches can be overlooked by microscopy (Chang and Gall 1998). Diatoms are generally  
695 conceptualized as the microplankton group associated with new production and high export potential  
696 (Legendre and Lefevre 1995; Uitz et al. 2006; Vidussi et al. 2001). However, there are increasing evidence  
697 supporting the importance of small nano- and even pico-sized diatoms in both coastal and oceanic systems  
698 (Arsenieff et al. 2020; Buck et al. 2008; Hernández-Ruiz et al. 2018; Lomas et al. 2009). Our results  
699 showing the dominance of *M. trioculatus* and *M. polymorphus* in STW particularly during the more  
700 productive conditions of the Spring Bloom II and the STF over the Chatham Rise (Figure 9, Figure S10)  
701 further support the important role played by small diatoms in driving open-ocean phytoplankton production  
702 (Leblanc et al. 2018).

#### 703 **4.3.6. Pelagophyceae**

704 Pelagophyceae showed the opposite trend compared to diatoms and have their lowest abundance associated  
705 with the STF zone (Figure 6). Their abundance and relative contribution increased towards SAW (Figure 5,  
706 Figure 6 in agreement with pigment-based dominance of *Pelagophyceae* in the SA waters east of C.  
707 Plateau (DiTullio et al. 2003). The relative abundance of this class and *Pelagomonas* species also  
708 decreased following natural or experimental iron addition experiments in HNLC waters of the SO (Irion  
709 et al. 2020; Thiele et al. 2014). These observations are consistent with the physiological advantage in iron  
710 uptake of pelagophytes over other small eukaryotic phytoplankton groups (Timmermans et al. 2005) and  
711 indicates a competitive advantage for pelagophytes under oligotrophic conditions. Vertically, the relative  
712 contribution of this class increased with depth (Figure 7, Figure S16) in agreement with their preference for  
713 deeper layers (Cabello et al. 2016; Gall et al. 2008; Latasa et al. 2017) and their physiological adaptation to  
714 low light and high nutrient environments (Dimier et al. 2009; Dupont et al. 2015). This vertical segregation

715 was evident in both STW and SAW samples despite the different specific composition observed in  
716 each water mass (Figure S9) with *Pelagomonas calceolata* (ASV0044) and unidentified pelagophyte  
717 (Pelagophyceae\_XXX.sp, ASV0081) being the most abundant species in STW and SAW, respectively  
718 (Figure 8)(Figure S9). *P. calceolata* is a widespread species (Andersen et al. 1996; Moon-van der Staay  
719 et al. 2001). Whether the ubiquity of this species is bound to high genetic diversity or physiological  
720 versatility is not clear. In our study, several ASVs were assigned to *P. calceolata* and while the most  
721 abundant one showed preference for STW, other less abundant ASVs were significantly more abundant  
722 in SAW (Figure S11). Similarly, we found different water mass preferences among ASVs assigned to  
723 unidentified pelagophytes, with some preferentially associated with STW or SAW but interestingly none  
724 with STF (Figure S11). While these observations suggest that different ASVs may reflect ecologically  
725 relevant different units (Rodríguez et al. 2005) they also highlight the importance of culture isolations and  
726 species characterization to better determine the diversity of pelagophyte assemblages.

#### 727 **4.3.7. Prymnesiophyceae**

728 Prymnesiophyceae were prevalent across all water mass metabarcodes (Figure 5) but tended to be more  
729 abundant in SAW (Figure 6). Overall, their relative contribution to eukaryotic phytoplankton assemblages  
730 was lower than depicted by pigment-based analyses of open ocean microbial communities (Andersen  
731 et al. 1996). The prevalence of 19'hexanoyloxyfucoxanthin pigment marker in oceanic waters and the  
732 application of quantitative methods (e.g. CHEMTAX) have shown that *Prymnesiophyceae* represents  
733 between 20-50 % of the phytoplankton community in oceanic waters (Andersen et al. 1996; DiTullio  
734 et al. 2003; Latasa et al. 2005; Liu et al. 2009; Swan et al. 2016). Such dominance has been also depicted  
735 by improved genomic approaches that revealed the extremely high genetic and functional diversity of  
736 non-calcifying prymnesiophytes (Cuvelier et al. 2010; Liu et al. 2009). In our study, non-calcifying  
737 species, mainly assigned to *Phaeocystis* spp. and *Chrysochromulina* spp., dominated the group (Figure S9)  
738 in agreement with DNA-based studies in the SW Pacific region (Sow et al. 2020; Wolf et al. 2014). The  
739 abundance and relative contribution of *Phaeocystis* spp. was lowest in STW, intermediate in STF and  
740 peaked in SAW while *Chrysochromulina* spp. followed the opposite trend with higher contributions  
741 associated with STW (Figure S9). The dominance of *Phaeocystis* spp. in SAW was mainly driven by *P.*

742 *antarctica* (Figure 8), corresponding with the prominence of this group in the Southern Ocean (Verity  
743 et al. 2007) and observed decreasing abundance observed from SAW towards STW of the SW Pacific  
744 region during austral autumn-Winter (Sow et al. 2020). These results contrast with the similar spatial  
745 distribution *P. antarctica* spp. metabarcodes observed between contrasting conditions on and off the  
746 Kerguelen Plateau (Irion et al. 2020). Strains assigned to *P. globosa* and *P. cordata* were also detected in  
747 all water masses although they tended to be more prevalent and abundant in STW compared to SAW in the  
748 New Zealand region (Sow et al. 2020). Coccolithophores are an important component of phytoplankton  
749 communities in the Southern Ocean region extending from the STF to the Polar Front known as the  
750 Great Calcite Belt (Balch et al. 2016; Chang and Northcote 2016). *Gephyrocapsa oceanica* was the most  
751 prevalent and abundant coccolithophore species found in our study. ASVs assigned of this species were  
752 found across all water masses but tended to be most abundant in the STF (Figure S9; Figure S10) in  
753 agreement with previous microscopy-based studies in this region of the SW Pacific (Rigual-Hernández  
754 et al. 2020; Saavedra-Pellitero et al. 2014). *Emiliana huxleyii*, which generally dominate coccolithophore  
755 assemblages in this region (Chang and Northcote 2016; Saavedra-Pellitero et al. 2014), and in the Southern  
756 Ocean (Balch et al. 2016; Holligan et al. 2010) showed very low abundances across the different water  
757 masses surveyed in this study (data not shown).

#### 758 **4.3.8. Cryptophyceae**

759 In our datasets, the contribution of *Cryptophyceae* metabarcodes was relatively low on average (<3%)  
760 but showed increasing abundance from SAW to STW where they represented up to 10% of protistan  
761 reads in the euphotic zone (Figure 6). The genus and species composition of this group also differ  
762 substantially between STW and SAW in our dataset (Figure S9). Similar water-mass preference was  
763 depicted by quantitative pigment analysis in the same STFZ region over the Chatham Rise, where  
764 cryptophytes contribution in STW (47-63% chl *a*) was higher than in SAW (6% chl *a*) in one of the two  
765 consecutive springs surveyed (Delizo et al. 2007). Cryptophytes are an ubiquitous phytoplankton group  
766 with widespread distribution from coastal to open oceanic systems and from tropical to polar latitudes  
767 (Buma et al. 1992; Nunes et al. 2019; Piwosz et al. 2013). They have been reported to form blooms  
768 in coastal embayments (Jeong et al. 2013; Johnson et al. 2013) and coastal Antarctic waters favoured



769 by low salinity conditions (Moline et al. 2004; Nunes et al. 2019; Schofield et al. 2017). The higher  
770 contributions we observed in STW relative to SAW, however, argues against the direct influence of salinity  
771 on cryptophytes at least in open-ocean waters. Cryptophytes have been also observed to respond positively  
772 to iron fertilization in HNLC waters of the North Pacific (Sato et al. 2009; Suzuki et al. 2009) suggesting  
773 that their lower abundance in SAW in our study could be related to iron-limited conditions characteristic of  
774 the subantarctic region. The contribution of cryptophytes in STW was highest during the open-ocean spring  
775 bloom (Spring Bloom II-TAN1212 voyage) and in shelf-slope stations of the EAUC current (Cross-shelf  
776 Exchange-TAN1604 voyage) consistent with their preference for more nutrient-rich conditions (Carreto  
777 et al. 2016; Fuller et al. 2006; Latasa et al. 2010). Significant contributions by cryptophytes has also been  
778 observed in open ocean waters of the NW Mediterranean at the termination of the spring bloom (Vidussi  
779 et al. 2000) where they even dominated the surface mixed layer community at highly stratified stations.  
780 Interestingly, the higher contribution of cryptophytes in our study occurred towards the end of the spring  
781 bloom (TAN1212)(Figure S16), coincident with strong surface stratification and biomass accumulation  
782 (Chiswell et al. 2019), and supporting the importance that stratification may have on this group compared  
783 to salinity. *G. cryophile* and other species of *Teleaulax* have been reported as mixotrophic (Schneider et al.  
784 2020), which could favor their increase in later stages of the spring bloom when the coincident decrease of  
785 nutrients and increase of potential preys tend to favor mixotrophy (Mitra et al. 2014).

#### 786 4.3.9. Heterotrophic and mixotrophic protists below the euphotic zone

787 We used the samples collected during six voyages of the Biophysical Moorings time-series between 2009-  
788 2012 to investigate the protistan community composition below the euphotic zone (Table 1). Metabarcoding  
789 datasets here were clearly dominated by Radiolaria (Figure 7), a holoplanktonic amoeboid group with  
790 widespread distribution in modern oceans (Biard et al. 2016; Suzuki and Not 2015). Radiolaria are mainly  
791 heterotrophic protists with many mixotrophic species in the photic zone bearing endosymbiotic microalgae  
792 that can contribute substantially to primary production in oligotrophic oceans (Caron et al. 1995; Decelle  
793 et al. 2015). While Radiolaria are found throughout the entire water column, their contribution to plankton  
794 biomass (Biard et al. 2016; Boltovskoy and Correa 2016) and metabarcodes (Ollison et al. 2021) tends to  
795 be greater in the mesopelagic ocean, in a way consistent with our metabarcoding results. In this study,

796 significant contributions of Radiolaria were mainly constrained to the aphotic zone (Figure 7). This depth-  
797 related pattern, contrasts with previously reported abundance of Radiolaria, and symbiotic Collodaria, in  
798 the sunlit ocean (Vargas et al. 2015). We found substantial contributions of photosymbiotic Collodaria at  
799 times, particularly in SAW (Figure S9), but the vertical distribution of Radiolaria below the euphotic zone  
800 suggested they were mainly composed of heterotrophic species. The high copy number of 18S rDNA in  
801 Radiolaria may contribute to their high relative abundance metabarcoding datasets ((Gutierrez-Rodriguez  
802 et al. 2019; Vargas et al. 2015)); however, it is unlikely to be responsible for their dominance, particularly  
803 in relation to dinoflagellates and ciliates, which are also known to have high copy numbers (Gong et al.  
804 2013; Piredda et al. 2017). Moreover, the positive relationship between cell length and 18S rDNA copy  
805 number (Biard et al. 2017; Zhu et al. 2005) and the higher C and N density (mass: volume) of Radiolaria  
806 compared to other protists (Mansour et al. 2021) suggest that gene-based relative abundance of these groups  
807 was likely reflected in their relative contribution to the community biomass.

808 Utilising their sticky pseudopodia and large size, Radiolaria dwelling below the euphotic zone can  
809 effectively intercept sinking particles and act as flux-feeders influencing the quality and quantity of  
810 vertical fluxes (Ohman et al. 2012; Stukel et al. 2019). The presence of mineral skeletons, made of  
811 silica (Polycystinean groups) or strontium sulfate (e.g. Acantharea), provides substantial mineral ballast  
812 (Takahashi 1983) conferring them a key role in vertical export that is supported by their common presence  
813 in sediment traps (Bernstein et al. 1987; Gutierrez-Rodriguez et al. 2019; Michaels et al. 1995; Preston  
814 et al. 2020) and their enrichment in suspended and sinking particles (Duret et al. 2020). Despite their  
815 abundance and their important role in biogeochemical processes (Biard et al. 2016; Guidi et al. 2016)  
816 little is known about the vertical distribution of Radiolaria particularly in the meso- and bathypelagic  
817 ocean (>500 m) (Biard and Ohman n.d.; Boltovskoy 2017; Llopis Monferrer et al. 2021; Ollison et al.  
818 2021). In our study, we found an opposite distribution between Acantharea and RAD-B, which showed  
819 preference for the upper (<500 m) and deeper (>500 m) mesopelagic samples, respectively (Figure 7).  
820 Among Acantharea, most sequences were assigned to the order *Chauchantida* (Figure S9, Figure S14),  
821 which has been found in sinking particles collected in the Southern Ocean (Duret et al. 2020) and the  
822 California Current (Gutierrez-Rodriguez et al. 2019; Preston et al. 2020). In a recent study conducted in  
823 the Southern Ocean, RAD B was reported to be enriched in small (<10  $\mu$ m) suspended particles relative

824 to sinking particles (Duret et al. 2020) while RAD-A were consistently found in sinking particles reaching  
825 abyssal depths in the California Current Ecosystem (Preston et al. 2020). The higher contribution of  
826 RAD-B relative to RAD-A we found in our study is consistent with the tendency of RAD-B to remain  
827 suspended compared to RAD-A with greater sinking potential. Among the polycystinean Radiolaria,  
828 Spumellarida was the most important order, in a way consistent with observed abundance of this order  
829 in sinking particulate organic matter collected in sediment traps deployed in mesopelagic and abyssal  
830 depths in the California Current Ecosystem (Gutierrez-Rodriguez et al. 2019; Preston et al. 2020). Several  
831 ASVs assigned to Spumellarida Group I were among the most abundant species in our study (Figure S13).  
832 Interestingly, some of these ASVs showed preference for SAW while others were more abundant in STW,  
833 highlighting the need to improve our taxonomic knowledge of this group.

834 Relative contributions of ciliates were also higher below the euphotic zone, mainly driven by ASVs  
835 affiliated with Spirotrichea class (Grattepanche et al. 2016). Most abundant ASVs assigned to the order  
836 Strombidiida (Oligotrichia, Spirotrichea) and *Leegaardiella* sp. (Choreotrichia, Spirotrichea), which have  
837 been reported below the euphotic zone at meso- and bathy-pelagic depths (Duret et al. 2020; Grattepanche  
838 et al. 2016). In addition to Spirotrichea, class Oligohymenophorea and Nassophorea contributed substan-  
839 tially in both STW and SAW, mainly sustained by ASVs assigned to OLIGO5 (*Oligophymenophorea*)  
840 and *Discotrichidae* (*Nassophorea*), both previously reported in mesopelagic waters (Duret et al. 2020).  
841 The dominance of these groups was consistent across different water masses off eastern New Zealand  
842 although some species like *Leegaardiella* (Oligotrichia) and *Strombidium\_k\_sp* (Choreotrichia) showed  
843 preference for STW and SAW, respectively (Figure S11). Ciliates below the euphotic zone feed on  
844 bacteria and small protists associated with particulate organic matter (Caron et al. 2012). Several species  
845 also have the potential to engage in photoautotrophy and phagotrophy (Leles et al. 2017). By doing so,  
846 ciliates play an important role within planktonic food webs contributing to trophic transfer and nutrient  
847 recycling in the dark ocean. The high taxonomic diversity and abundance of heterotrophic protists in this  
848 and previous studies (Duret et al. 2020; Grattepanche et al. 2016; Ollison et al. 2021; Zoccarato et al.  
849 2016) highlights their importance in planktonic systems below the euphotic zone and emphasises how  
850 little we know about their ecological role in the food web functioning. Further studies focusing on the  
851 taxonomic and functional diversity of heterotrophic protists have the potential to shed light on the trophic

852 and biogeochemical processes that transform organic matter in the dark ocean, and hence significantly  
853 improve our understanding of the biological carbon pump and natural deep-ocean carbon sequestration.

## 854 **5. CONCLUSIONS**

855 The spatial diversity patterns observed are in agreement with global trends of decreasing diversity at higher  
856 latitudes and colder waters. However, deviations from this general pattern were also observed regionally.  
857 Species richness and diversity of protist communities in the STF were systematically lower compared to  
858 adjacent STW and SAW waters in the northern and southern regions of the STFZ surveyed, highlighting  
859 the importance of oceanographic features in determining regional diversity. Dinoflagellates and green  
860 algae co-dominated the protist community in the euphotic zone but water-mass specificity emerged at lower  
861 taxonomic levels within these and other major taxonomic groups and the community composition varied  
862 consistently between water masses. Within green algae for instance, *Mamiellophyceae* class dominated  
863 in STW driven by several species showing different regional abundance, while *Chloropicophyceae* class  
864 became dominant in SAW where several ASVs assigned to *Chloroparvula pacifica* appeared among  
865 the most abundant taxa. Interestingly, other less abundant ASVs identified as *Chloroparvula pacifica*  
866 showed statistically significant preference for STW. Analogous intra-specific variability was observed  
867 within species belonging to other phytoplankton classes with widespread distribution (e.g. *P. antarctica*,  
868 prymnesiophytes; *P. calceolata*, pelagophytes) suggesting the genotypic diversity may be linked to  
869 ecological traits that influence distribution patterns. Although chl *a* levels comprised in this study were  
870 relatively low, small rather than large taxa dominated the phytoplankton proliferations associated with  
871 spring bloom conditions and the STFZ suggesting that picoplankton can also be important for primary  
872 and export production either directly or through zooplankton grazing. The mesopelagic zone was clearly  
873 dominated by radiolarian sequences, supporting the importance of this group for the functioning of the  
874 dark ocean. Taxonomic assignment revealed a diverse assemblage of Radiolaria and a taxon-specific water  
875 mass and vertical distribution patterns. However, further research is needed about the ecology of these  
876 organisms to link this compositional variability to their function in the system.

## 877 6. BIBLIOGRAPHY

### 878 References

- 879 Agogu e, H., D. Lamy, P. NEAL, M. L. SOGIN, and G. J. Herndl (2011). “Water Mass-Specificity  
880 of Bacterial Communities in the North Atlantic Revealed by Massively Parallel Sequencing”. In:  
881 *Molecular Ecology* 20.2, pp. 258–274.
- 882 Allen, R., S. TC, K. Currie, and D. PW (2020). “Distinct Processes Structure Bacterioplankton and Protist  
883 Communities across an Oceanic Front”. In: *Aquatic Microbial Ecology* 85, pp. 19–34.
- 884 Andersen, R. A., R. R. Bidigare, M. D. Keller, and M. Latasat (1996). “A Comparison of HPLC Pigment  
885 Signatures and Electron Microscopic Observations for Oligotrophic Waters of the North Atlantic and  
886 Pacific Oceans”. In: *Oceans* 43.2, pp. 517–537.
- 887 Archer, S. D., R. J. G. Leakey, P. H. Burkill, and M. A. Sleight (1996). “Microbial Dynamics in Coastal  
888 Waters of East Antarctica: Herbivory by Heterotrophic Dinoflagellates”. In: *Marine Ecology Progress  
889 Series* 139.1/3, pp. 239–255. JSTOR: [24857109](#).
- 890 Arsenieff, L., F. Le Gall, F. Rigaut-Jalabert, F. Mah e, D. Sarno, L. Gouhier, A.-C. Baudoux, and N.  
891 Simon (2020). “Diversity and Dynamics of Relevant Nanoplanktonic Diatoms in the Western English  
892 Channel”. In: *The ISME Journal*.
- 893 Assmy, P. et al. (2013). “Thick-Shelled, Grazer-Protected Diatoms Decouple Ocean Carbon and Silicon  
894 Cycles in the Iron-Limited Antarctic Circumpolar Current.” In: *Proceedings of the National Academy  
895 of Sciences of the United States of America* 110.51, pp. 20633–8. pmid: [24248337](#).
- 896 Baird, R. B. (2017). “Standard Methods for the Examination of Water and Wastewater, 23rd”. In:
- 897 Balch, W. M., N. R. Bates, P. J. Lam, B. S. Twining, S. Z. Rosengard, B. C. Bowler, D. T. Drapeau,  
898 R. Garley, L. C. Lubelczyk, C. Mitchell, and S. Rauschenberg (2016). “Factors Regulating the Great  
899 Calcite Belt in the Southern Ocean and Its Biogeochemical Significance”. In: *Global Biogeochemical  
900 Cycles* 30.8, pp. 1124–1144.
- 901 Baltar, F., K. Currie, E. Stuck, S. Roosa, and S. E. Morales (2016). “Oceanic Fronts: Transition Zones  
902 for Bacterioplankton Community Composition”. In: *Environ Microbiol Rep* 8.1, pp. 132–138. pmid:  
903 [26636656](#).

- 904 Banse, K. (1996). “Low Seasonality of Low Concentrations of Surface Chlorophyll in the Subantarctic  
905 Water Ring: Underwater Irradiance, Iron, or Grazing?” In: *Progress in oceanography* 37.3-4, pp. 241–  
906 291.
- 907 Banse, K. and D. C. English (1997). “Near-Surface Phytoplankton Pigment from the Coastal Zone Color  
908 Scanner in the Subantarctic Region Southeast of New Zealand”. In: *Marine Ecology Progress Series*  
909 156, pp. 51–66. pmid: [455](#).
- 910 Barton, A. D., S. Dutkiewicz, G. Flierl, J. Bragg, and M. J. Follows (2010). “Patterns of Diversity in  
911 Marine Phytoplankton”. In: *Science* 327.5972, 1509 LP –1511.
- 912 Belkin, I. M. and A. L. Gordon (1996). “Southern Ocean Fronts from the Greenwich Meridian to Tasmania”.  
913 In: *Journal of Geophysical Research: Oceans* 101.C2, pp. 3675–3696.
- 914 Bernstein, R. E., P. R. Betzer, R. A. Feely, R. H. Byrne, M. F. Lamb, and A. F. Michaels (1987).  
915 “Acantharian Fluxes and Strontium to Chlorinity Ratios in the North Pacific Ocean”. In: *Science*  
916 237.4821, pp. 1490–1494.
- 917 Bertrand, E. M., M. A. Saito, J. M. Rose, C. R. Riesselman, M. C. Lohan, A. E. Noble, P. A. Lee, and  
918 G. R. DiTullio (2007). “Vitamin B12 and Iron Colimitation of Phytoplankton Growth in the Ross Sea”.  
919 In: *Limnology and Oceanography* 52.3, pp. 1079–1093.
- 920 Biard, T., E. Bigeard, S. Audic, J. Poulain, A. Gutierrez-Rodriguez, S. Pesant, L. Stemmann, and F. Not  
921 (2017). “Biogeography and Diversity of Collodaria (Radiolaria) in the Global Ocean”. In: *ISME Journal*  
922 11.6, pp. 1331–1344.
- 923 Biard, T., L. Stemmann, M. Picheral, N. Mayot, P. Vandromme, H. Hauss, G. Gorsky, L. Guidi, R. Kiko,  
924 and F. Not (2016). “In Situ Imaging Reveals the Biomass of Giant Protists in the Global Ocean”. In:  
925 *Nature* 532.7600, pp. 504–507. pmid: [27096373](#).
- 926 Biard, T. and M. D. Ohman (n.d.). “Vertical Niche Definition of Test-Bearing Protists (Rhizaria) into the  
927 Twilight Zone Revealed by in Situ Imaging”. In: *LIMNOLOGY AND OCEANOGRAPHY* ().
- 928 Bolaños, L. M., L. Karp-Boss, C. J. Choi, A. Z. Worden, J. R. Graff, N. Haëntjens, A. P. Chase, A.  
929 Della Penna, P. Gaube, F. Morison, S. Menden-Deuer, T. K. Westberry, R. T. O’Malley, E. Boss, M. J.  
930 Behrenfeld, and S. J. Giovannoni (2020). “Small Phytoplankton Dominate Western North Atlantic  
931 Biomass”. In: *The ISME Journal*, pp. 1–12.

- 932 Boltovskoy, D. (2017). “Vertical Distribution Patterns of Radiolaria Polycystina (Protista) in the World  
933 Ocean: Living Ranges, Isothermal Submersion and Settling Shells”. In: *Journal of Plankton Research*  
934 39.2, pp. 330–349.
- 935 Boltovskoy, D. and N. Correa (2016). “Biogeography of Radiolaria Polycystina (Protista) in the World  
936 Ocean”. In: *Progress in Oceanography* 149, pp. 82–105.
- 937 Bowen, M., P. Sutton, and D. Roemmich (2014). “Estimating Mean Dynamic Topography in Boundary  
938 Currents and the Use of A Rgo Trajectories”. In: *Journal of Geophysical Research: Oceans* 119.12,  
939 pp. 8422–8437.
- 940 Boyd, P. W., R. Strzepek, F. Fu, and D. A. Hutchins (2010). “Environmental Control of Open-Ocean  
941 Phytoplankton Groups: Now and in the Future”. In: *Limnology and oceanography* 55.3, pp. 1353–1376.
- 942 Boyd, P., H. Claustre, M. Levy, D. A. Siegel, and T. Weber (2019). “Multi-Faceted Particle Pumps Drive  
943 Carbon Sequestration in the Ocean”. In: *Nature* 568.7752, pp. 327–335.
- 944 Boyd, P., J. LaRoche, M. Gall, R. Frew, and R. M. L. McKay (1999). “Role of Iron, Light, and Silicate in  
945 Controlling Algal Biomass in Subantarctic Waters SE of New Zealand”. In: *Journal of Geophysical*  
946 *Research: Oceans* 104.C6, pp. 13395–13408.
- 947 Bradford-Grieve, J. M., P. W. Boyd, F. H. Chang, S. Chiswell, M. Hadfield, J. A. Hall, M. R. James,  
948 S. D. Nodder, and E. A. Shushkina (1999). “Pelagic Ecosystem Structure and Functioning in the  
949 Subtropical Front Region East of New Zealand in Austral Winter and Spring 1993”. In: *Journal of*  
950 *Plankton Research* 21.3, pp. 405–428.
- 951 Bradford-Grieve, J. M., F. H. Chang, M. Gall, S. Pickmere, and F. Richards (1997). “Size-fractionated  
952 Phytoplankton Standing Stocks and Primary Production during Austral Winter and Spring 1993 in  
953 the Subtropical Convergence Region near New Zealand”. In: *New Zealand Journal of Marine and*  
954 *Freshwater Research* 31.2, pp. 201–224.
- 955 Buck, K. R., F. R. Chavez, and A. S. Davis (2008). “Minidiscus Trioculatus, a Small Diatom with a Large  
956 Presence in the Upwelling Systems of Central California”. In: *Nova Hedwigia*, pp. 1–6.
- 957 Buma, A. G. J., W. W. C. Gieskes, and H. A. Thomsen (1992). “Abundance of Cryptophyceae and  
958 Chlorophyll B-Containing Organisms in the Weddell-Scotia Confluence Area in the Spring of 1988”.  
959 In: *Weddell Sea Ecology*. Springer, pp. 43–52.

- 960 Bustillos-Guzman, J., H. Claustre, and J.-c. Marty (1995). “Specific Phytoplankton Signatures and Their  
961 Relationship to Hydrographic Conditions in the Coastal Northwestern Mediterranean Sea”. In: *Marine  
962 Ecology Progress Series* 124, pp. 247–258.
- 963 Cabello, A. M., M. Latasa, I. Forn, X. A. G. Morán, and R. Massana (2016). “Vertical Distribution of Major  
964 Photosynthetic Picoeukaryotic Groups in Stratified Marine Waters”. In: *Environmental microbiology*  
965 18.5, pp. 1578–1590.
- 966 Calbet, a. and E. Saiz (2005). “The Ciliate-Copepod Link in Marine Ecosystems”. In: *Aquatic Microbial  
967 Ecology* 38, pp. 157–167.
- 968 Calbet, A. and M. Landry (2004). “Phytoplankton Growth, Microzooplankton Grazing, and Carbon  
969 Cycling in Marine Systems”. In: *Limnology and Oceanography* 49.1, pp. 51–57.
- 970 Callahan, B. J., P. J. McMurdie, and S. P. Holmes (2017). “Exact Sequence Variants Should Replace  
971 Operational Taxonomic Units in Marker-Gene Data Analysis”. In: *ISME Journal* 11.12, pp. 2639–  
972 2643.
- 973 Caron, D. A., A. F. Michaels, N. R. Swanberg, and F. A. Howse (1995). “Primary Productivity by  
974 Symbiont-Bearing Sarcodine (Acantharia, Radiolaria, Foraminifera) in Surface Waters near Bermuda.”  
975 In: *Journal of Plankton Research* 17.1, pp. 103–129.
- 976 Caron, D. A., P. D. Countway, A. C. Jones, D. Y. Kim, and A. Schnetzer (2012). “Marine Protistan  
977 Diversity”. In: *Annual Review of Marine Science* 4.1, pp. 467–493.
- 978 Carreto, J. I., N. G. Montoya, M. O. Carignan, R. Akselman, E. M. Acha, and C. Derisio (2016). “En-  
979 vironmental and Biological Factors Controlling the Spring Phytoplankton Bloom at the Patagonian  
980 Shelf-Break Front - Degraded Fucoxanthin Pigments and the Importance of Microzooplankton Graz-  
981 ing”. In: *Progress in Oceanography* 146, pp. 1–21.
- 982 Cavicchioli, R. et al. (2019). “Scientists’ Warning to Humanity: Microorganisms and Climate Change”. In:  
983 *Nature Reviews Microbiology* 17.9, pp. 569–586.
- 984 Chang, F. H., J. Zeldis, M. Gall, and J. Hall (2003). “Seasonal and Spatial Variation of Phytoplankton  
985 Assemblages, Biomass and Cell Size from Spring to Summer across the North-Eastern New Zealand  
986 Continental Shelf”. In: *Journal of Plankton Research* 25.7, pp. 737–758.



- 987 Chang, F. H. and M. Gall (1998). “Phytoplankton Assemblages and Photosynthetic Pigments during  
988 Winter and Spring in the Subtropical Convergence Region near New Zealand”. In: *New Zealand  
989 Journal of Marine and Freshwater Research* 32.4, pp. 515–530.
- 990 Chang, F. H. and L. Northcote (2016). “Species Composition of Extant Coccolithophores Including Twenty  
991 Six New Records from the Southwest Pacific near New Zealand”. In: *Marine Biodiversity Records* 9.1.  
992 Chiswell, S. M. (2001). “Eddy Energetics in the Subtropical Front over the Chatham Rise, New Zealand”.  
993 In: *New Zealand Journal of Marine and Freshwater Research* 35.1, pp. 1–15.
- 994 Chiswell, S. M., H. C. Bostock, P. J. H. Sutton, and M. J. M. Williams (2015). “Physical Oceanography of  
995 the Deep Seas around New Zealand: A Review”. In: *New Zealand Journal of Marine and Freshwater  
996 Research* 49.2, pp. 286–317.
- 997 Chiswell, S. M., K. A. Safi, S. G. Sander, R. Strzepek, M. J. Ellwood, A. Milne, and P. W. Boyd (2019).  
998 “Exploring Mechanisms for Spring Bloom Evolution: Contrasting 2008 and 2012 Blooms in the  
999 Southwest Pacific Ocean”. In: *Journal of Plankton Research* 41.3, pp. 329–348.
- 1000 Cuvelier, M. L. et al. (2010). “Targeted Metagenomics and Ecology of Globally Important Uncultured  
1001 Eukaryotic Phytoplankton.” In: *Proceedings of the National Academy of Sciences of the United States  
1002 of America* 107.33, pp. 14679–84. pmid: [20668244](#).
- 1003 Deacon, G. (1982). “Physical and Biological Zonation in the Southern Ocean”. In: *Deep Sea Research  
1004 Part A. Oceanographic Research Papers* 29.1, pp. 1–15.
- 1005 Decelle, J., S. Colin, and R. A. Foster (2015). “Photosymbiosis in Marine Planktonic Protists”. In: pp. 465–  
1006 500.
- 1007 Delizo, L., W. O. Smith, and J. Hall (2007). “Taxonomic Composition and Growth Rates of Phytoplankton  
1008 Assemblages at the Subtropical Convergence East of New Zealand”. In: *Journal of Plankton Research*  
1009 29.8, pp. 655–670.
- 1010 Dimier, C., C. Brunet, R. Geider, and J. Raven (2009). “Growth and Photoregulation Dynamics of the  
1011 Picoeukaryote *Pelagomonas Calceolata* in Fluctuating Light”. In: *Limnology and Oceanography* 54.3,  
1012 pp. 823–836.

- 1013 DiTullio, G. R., M. E. Geesey, D. R. Jones, K. L. Daly, L. Campbell, and W. O. Smith Jr (2003).  
1014 “Phytoplankton Assemblage Structure and Primary Productivity along 170 W in the South Pacific  
1015 Ocean”. In: *Marine Ecology Progress Series* 255, pp. 55–80.
- 1016 Dugdale, R. C., F. P. Wilkerson, and H. J. Minas (1995). “The Role of a Silicate Pump in Driving New  
1017 Production”. In: *Deep Sea Research I* 42.5, pp. 697–719.
- 1018 Dupont, C. L., J. P. McCrow, R. Valas, A. Moustafa, N. Walworth, U. Goodenough, R. Roth, S. L. Hogle, J.  
1019 Bai, and Z. I. Johnson (2015). “Genomes and Gene Expression across Light and Productivity Gradients  
1020 in Eastern Subtropical Pacific Microbial Communities”. In: *The ISME journal* 9.5, pp. 1076–1092.
- 1021 Duret, M. T., R. S. Lampitt, and P. Lam (2020). “Eukaryotic Influence on the Oceanic Biological Carbon  
1022 Pump in the Scotia Sea as Revealed by 18S rRNA Gene Sequencing of Suspended and Sinking  
1023 Particles”. In: *Limnology and Oceanography* 65 (1, SI), S49–S70.
- 1024 Ellwood, M. J., C. S. Law, J. Hall, E. M. S. Woodward, R. Strzepek, J. Kuparinen, K. Thompson, S.  
1025 Pickmere, P. Sutton, and P. W. Boyd (2013). “Relationships between Nutrient Stocks and Inventories  
1026 and Phytoplankton Physiological Status along an Oligotrophic Meridional Transect in the Tasman  
1027 Sea”. In: *Deep-Sea Research Part I-Oceanographic Research Papers* 72, pp. 102–120.
- 1028 Ellwood, M. J., A. R. Bowie, A. Baker, M. Gault-Ringold, C. Hassler, C. S. Law, W. A. Maher, A. Marriner,  
1029 S. Nodder, S. Sander, C. Stevens, A. Townsend, P. van der Merwe, E. M. S. Woodward, K. Wuttig,  
1030 and P. W. Boyd (2018). “Insights into the Biogeochemical Cycling of Iron, Nitrate, and Phosphate  
1031 across a 5,300 Km South Pacific Zonal Section (153°E–150°W)”. In: *Global Biogeochemical Cycles*  
1032 32.2, pp. 187–207.
- 1033 Fernandez, D., M. Bowen, and P. Sutton (2018). “Variability, Coherence and Forcing Mechanisms in the  
1034 New Zealand Ocean Boundary Currents”. In: *Progress in Oceanography* 165, pp. 168–188.
- 1035 Field, C. B., M. J. Behrenfeld, J. T. Randerson, and P. G. & Falkowski (1998). “Primary Production of  
1036 the Biosphere: Integrating Terrestrial and Oceanic Components”. In: *Science* 281.5374, pp. 237–240.  
1037 pmid: [9657713](#).
- 1038 Forcén-Vázquez, A., M. J. M. Williams, M. Bowen, L. Carter, and H. Bostock (2021). “Frontal Dynamics  
1039 and Water Mass Variability on the Campbell Plateau”. In: *New Zealand Journal of Marine and  
1040 Freshwater Research* 55.1, pp. 199–222.

- 1041 Fuhrman, J. A., J. A. Steele, I. Hewson, M. S. Schwalbach, M. V. Brown, J. L. Green, and J. H. Brown  
1042 (2008). “A Latitudinal Diversity Gradient in Planktonic Marine Bacteria”. In: *Proceedings of the*  
1043 *National Academy of Sciences* 105.22, 7774 LP–7778.
- 1044 Fuller, N. J., G. a. Tarran, D. G. Cummings, E. M. S. Woodward, K. M. Orcutt, M. Yallop, F. Le Gall,  
1045 and D. J. Scanlan (2006). “Molecular Analysis of Photosynthetic Picoeukaryote Community Structure  
1046 along an Arabian Sea Transect”. In:
- 1047 Galand, P. E., M. Potvin, E. O. Casamayor, and C. Lovejoy (2010). “Hydrography Shapes Bacterial  
1048 Biogeography of the Deep Arctic Ocean”. In: *The ISME Journal* 4.4, pp. 564–576.
- 1049 Gall, F. L., F. Rigaut-Jalabert, D. Marie, L. Garczarek, M. Viprey, A. Gobet, and D. Vaultot (2008).  
1050 “Picoplankton Diversity in the South-East Pacific Ocean from Cultures”. In: *Biogeosciences* 5.1,  
1051 pp. 203–214.
- 1052 Gardner, W. D., S. P. Chung, M. J. Richardson, and I. D. Walsh (1995). “The Oceanic Mixed-Layer Pump”.  
1053 In: *Deep Sea Research Part II: Topical Studies in Oceanography* 42.2-3, pp. 757–775.
- 1054 Gong, J., J. Dong, X. Liu, and R. Massana (2013). “Extremely High Copy Numbers and Polymorphisms  
1055 of the rDNA Operon Estimated from Single Cell Analysis of Oligotrich and Peritrich Ciliates”. In:  
1056 *PROTIST* 164.3, pp. 369–379.
- 1057 Grattepanche, J.-D., L. F. Santoferrara, G. B. McManus, and L. A. Katz (2016). “Unexpected Biodiversity  
1058 of Ciliates in Marine Samples from below the Photic Zone”. In: *Molecular Ecology* 25.16, pp. 3987–  
1059 4000.
- 1060 Guidi, L. et al. (2016). “Plankton Networks Driving Carbon Export in the Oligotrophic Ocean”. In: *Nature*  
1061 532.7600, pp. 465–+.
- 1062 Gutierrez-Rodriguez, A., M. R. Stukel, A. dos Santos, T. Biard, R. Scharek, D. Vaultot, M. R. Landry, and  
1063 F. Not (2019). “High Contribution of Rhizaria (Radiolaria) to Vertical Export in the California Current  
1064 Ecosystem Revealed by DNA Metabarcoding”. In: *The ISME journal* 13.4, pp. 964–976.
- 1065 Gutiérrez-Rodríguez, A., K. Safi, D. Fernández, A. Forcén-Vázquez, P. Gourvil, L. Hoffmann, M. Pinker-  
1066 ton, P. Sutton, and S. D. Nodder (2020). “Decoupling between Phytoplankton Growth and Microzoo-  
1067 plankton Grazing Enhances Productivity in Subantarctic Waters on Campbell Plateau, Southeast of  
1068 New Zealand”. In: *Journal of Geophysical Research: Oceans* 125.2, e2019JC015550.

- 1069 Gutiérrez-Rodríguez, A., M. Latasa, R. Scharek, R. Massana, G. Vila, and J. M. Gasol (2011). “Growth  
1070 and Grazing Rate Dynamics of Major Phytoplankton Groups in an Oligotrophic Coastal Site”. In:  
1071 *Estuarine, Coastal and Shelf Science* 95.1, pp. 77–87.
- 1072 Hall, J. A., M. R. James, and J. M. Bradford-Grieve (1999). “Structure and Dynamics of the Pelagic  
1073 Microbial Food Web of the Subtropical Convergence Region East of New Zealand”. In: *Aquatic*  
1074 *Microbial Ecology* 20.1, pp. 95–105.
- 1075 Hall, J. A., K. Safi, M. R. James, J. Zeldis, and M. Weatherhead (2006). “Microbial Assemblage during  
1076 the Spring-Summer Transition on the Northeast Continental Shelf of New Zealand”. In: *New Zealand*  
1077 *Journal of Marine and Freshwater Research* 40.1, pp. 195–210.
- 1078 Hamilton, A. K., C. Lovejoy, P. E. Galand, and R. G. Ingram (2008). “Water Masses and Biogeography  
1079 of Picoeukaryote Assemblages in a Cold Hydrographically Complex System”. In: *Limnology and*  
1080 *Oceanography* 53.3, pp. 922–935.
- 1081 Hansen, P. J. (1992). “Prey Size Selection, Feeding Rates and Growth Dynamics of Heterotrophic  
1082 Dinoflagellates with Special Emphasis on *Gyrodinium Spirale*”. In: *Marine Biology* 114.2, pp. 327–  
1083 334.
- 1084 Heath, R. A. (1985). “A Review of the Physical Oceanography of the Seas around New Zealand — 1982”.  
1085 In: *New Zealand Journal of Marine and Freshwater Research* 19.1, pp. 79–124.
- 1086 Henley, S. F., E. L. Cavan, S. E. Fawcett, R. Kerr, T. Monteiro, R. M. Sherrell, A. R. Bowie, P. W. Boyd,  
1087 D. K. Barnes, I. R. Schloss, T. Marshall, R. Flynn, and S. Smith (2020). “Changing Biogeochemistry  
1088 of the Southern Ocean and Its Ecosystem Implications”. In: *Frontiers in Marine Science*. Vol. 7. July,  
1089 pp. 1–31.
- 1090 Hernández-Ruiz, M., E. Barber-Lluch, A. Prieto, X. A. Álvarez-Salgado, R. Logares, and E. Teira (2018).  
1091 “Seasonal Succession of Small Planktonic Eukaryotes Inhabiting Surface Waters of a Coastal Upwelling  
1092 System”. In: *Environmental microbiology* 20.8, pp. 2955–2973.
- 1093 Holligan, P., A. Charalampopoulou, and R. Hutson (2010). “Seasonal Distributions of the Coccolithophore,  
1094 *Emiliana Huxleyi*, and of Particulate Inorganic Carbon in Surface Waters of the Scotia Sea”. In:  
1095 *Journal of Marine Systems* 82.4, pp. 195–205.

- 1096 Ibarbalz, F. M. et al. (2019). “Global Trends in Marine Plankton Diversity across Kingdoms of Life”. In:  
1097 *Cell* 179.5, 1084–1097.e21.
- 1098 Iida, T. and T. Odate (2014). “Seasonal Variability of Phytoplankton Biomass and Composition in the  
1099 Major Water Masses of the Indian Ocean Sector of the Southern Ocean”. In: *Polar Science* 8.3,  
1100 pp. 283–297.
- 1101 Irion, S., L. Jardillier, I. Sassenhagen, and U. Christaki (2020). “Marked Spatiotemporal Variations in  
1102 Small Phytoplankton Structure in Contrasted Waters of the Southern Ocean (Kerguelen Area)”. In:  
1103 *Limnology and Oceanography* 65.11, pp. 2835–2852.
- 1104 Jang, S. H., H. J. Jeong, M. J. Lee, J. H. Kim, and J. H. You (2019). “Gyrodinium Jinhaense n. Sp., a New  
1105 Heterotrophic Unarmored Dinoflagellate from the Coastal Waters of Korea”. In: *Journal of Eukaryotic*  
1106 *Microbiology* 66.5, pp. 821–835.
- 1107 Jeong, H. J., Y. Du Yoo, J. S. Kim, K. A. Seong, N. S. Kang, and T. H. Kim (2010). “Growth, Feeding and  
1108 Ecological Roles of the Mixotrophic and Heterotrophic Dinoflagellates in Marine Planktonic Food  
1109 Webs”. In: *Ocean science journal* 45.2, pp. 65–91.
- 1110 Jeong, H. J., K. A. Seong, Y. D. YOO, T. H. Kim, N. S. Kang, S. Kim, J. Y. Park, J. S. Kim, G. H. Kim,  
1111 and J. Y. Song (2008). “Feeding and Grazing Impact by Small Marine Heterotrophic Dinoflagellates  
1112 on Heterotrophic Bacteria”. In: *Journal of Eukaryotic Microbiology* 55.4, pp. 271–288.
- 1113 Jeong, H. J., Y. D. Yoo, K. H. Lee, T. H. Kim, K. A. Seong, N. S. Kang, S. Y. Lee, J. S. Kim, S. Kim,  
1114 and W. H. Yih (2013). “Red Tides in Masan Bay, Korea in 2004–2005: I. Daily Variations in the  
1115 Abundance of Red-Tide Organisms and Environmental Factors”. In: *Harmful Algae* 30, S75–S88.
- 1116 Joglar, V., X. A. Álvarez-Salgado, A. Gago-Martinez, J. M. Leao, C. Pérez-Martínez, B. Pontiller,  
1117 D. Lundin, J. Pinhassi, E. Fernández, and E. Teira (2021). “Cobalamin and Microbial Plankton  
1118 Dynamics along a Coastal to Offshore Transect in the Eastern North Atlantic Ocean”. In: *Environmental*  
1119 *Microbiology* 23.3, pp. 1559–1583.
- 1120 Johnson, M. D., D. K. Stoecker, and H. G. Marshall (2013). “Seasonal Dynamics of *Mesodinium Rubrum*  
1121 in Chesapeake Bay”. In: *Journal of plankton research* 35.4, pp. 877–893.

- 1122 Koch, F., M. A. Marcoval, C. Panzeca, K. W. Bruland, S. A. Sanudo-Wilhelmy, and C. J. Gobler (2011).  
1123 “The Effect of Vitamin B12 on Phytoplankton Growth and Community Structure in the Gulf of Alaska”.  
1124 In: *Limnology and Oceanography* 56.3, pp. 1023–1034.
- 1125 Latasa, M., R. Scharek, M. Vidal, G. Vila-Reixach, A. Gutiérrez-Rodríguez, M. Emelianov, and J.  
1126 Gasol (2010). “Preferences of Phytoplankton Groups for Waters of Different Trophic Status in the  
1127 Northwestern Mediterranean Sea”. In: *Marine Ecology Progress Series* 407.
- 1128 Latasa, M., A. M. Cabello, X. A. G. Morán, R. Massana, and R. Scharek (2017). “Distribution of  
1129 Phytoplankton Groups within the Deep Chlorophyll Maximum”. In: *Limnology and Oceanography*  
1130 62.2, pp. 665–685.
- 1131 Latasa, M., A. G. Moran, R. Scharek, and M. Estrada (2005). “Estimating the Carbon Flux through Main  
1132 Phytoplankton Groups in the Northwestern Mediterranean”. In: *Limnology and Oceanography* 50.5,  
1133 pp. 1447–1458.
- 1134 Law, C., M. Smith, C. Stevens, E. Abraham, M. Ellwood, P. Hill, S. Nodder, J. Peloquin, S. Pickmere,  
1135 K. Safi, and C. Walkington (2011). “Did Dilution Limit the Phytoplankton Response to Iron Addition  
1136 in HNLCLSi Sub-Antarctic Waters during the SAGE Experiment?” In: *Deep Sea Research Part II:  
1137 Topical Studies in Oceanography* 58.6, pp. 786–799.
- 1138 Law, C. S., E. Breitbarth, L. J. Hoffmann, C. M. McGraw, R. J. Langlois, J. LaRoche, A. Marriner, and K.  
1139 a. Safi (2012). “No Stimulation of Nitrogen Fixation by Non-Filamentous Diazotrophs under Elevated  
1140 CO<sub>2</sub> in the South Pacific”. In: *Global Change Biology* 18.10, pp. 3004–3014.
- 1141 Leblanc, K., B. Queguiner, F. Diaz, V. Cornet, M. Michel-Rodriguez, X. D. de Madron, C. Bowler, S.  
1142 Malviya, M. Thyssen, and G. Grégori (2018). “Nanoplanktonic Diatoms Are Globally Overlooked but  
1143 Play a Role in Spring Blooms and Carbon Export”. In: *Nature Communications* 9.1, pp. 1–12.
- 1144 Legendre, L. and J. Lefevre (1995). “Microbial Food Webs and the Export of Biogenic Carbon in Oceans”.  
1145 In: *Aquatic Microbial Ecology* 9.1, pp. 69–77.
- 1146 Leles, S., A. Mitra, K. Flynn, D. Stoecker, P. Hansen, A. Calbet, G. McManus, R. Sanders, D. Caron, and  
1147 F. Not (2017). “Oceanic Protists with Different Forms of Acquired Phototrophy Display Contrasting  
1148 Biogeographies and Abundance”. In: *Proceedings of the Royal Society B: Biological Sciences* 284.1860,  
1149 p. 20170664.

- 1150 Lemieux, C., M. Turmel, C. Otis, and J.-F. Pombert (2019). “A Streamlined and Predominantly Diploid  
1151 Genome in the Tiny Marine Green Alga *Chloropicon Primus*”. In: *Nature communications* 10.1,  
1152 pp. 1–13.
- 1153 Liu, H., I. Probert, J. Uitz, H. Claustre, S. Aris-Brosou, M. Frada, F. Not, and C. de Vargas (2009). “Extreme  
1154 Diversity in Noncalcifying Haptophytes Explains a Major Pigment Paradox in Open Oceans.” In:  
1155 *Proceedings of the National Academy of Sciences of the United States of America* 106.31, pp. 12803–8.  
1156 pmid: [19622724](#).
- 1157 Llopis Monferrer, N., A. Leynaert, P. Tréguer, A. Gutiérrez-Rodríguez, B. Moriceau, M. Gallinari, M.  
1158 Latasa, S. L’Helguen, J.-F. Maguer, and K. Safi (2021). “Role of Small Rhizaria and Diatoms in the  
1159 Pelagic Silica Production of the Southern Ocean”. In: *Limnology and Oceanography*.
- 1160 Lomas, M. W., N. Roberts, F. Lipschultz, J. W. Krause, D. M. Nelson, and N. R. Bates (2009). “Deep-  
1161 Sea Research I Biogeochemical Responses to Late-Winter Storms in the Sargasso Sea . IV . Rapid  
1162 Succession of Major Phytoplankton Groups”. In: *Deep-Sea Research* 56, pp. 892–908.
- 1163 Longhurst, A. R. (2007). *Ecological Geography of the Sea*. 2nd ed. Ac, 398p.
- 1164 Lopes dos Santos, A., P. Gourvil, M. Tragin, M.-H. Noël, J. Decelle, S. Romac, and D. Vaultot (2017a).  
1165 “Diversity and Oceanic Distribution of Prasinophytes Clade VII, the Dominant Group of Green Algae  
1166 in Oceanic Waters”. In: *The ISME Journal* 11.2, pp. 512–528.
- 1167 Lopes dos Santos, A., T. Pollina, P. Gourvil, E. Corre, D. Marie, J. L. Garrido, F. Rodríguez, M.-H.  
1168 Noël, D. Vaultot, and W. Eikrem (2017b). “Chloropicophyceae, a New Class of Picophytoplanktonic  
1169 Prasinophytes”. In: *Scientific Reports* 7.1, p. 14019.
- 1170 Love, M. I., W. Huber, and S. Anders (2014). “Moderated Estimation of Fold Change and Dispersion for  
1171 RNA-Seq Data with DESeq2”. In: *Genome biology* 15.12, pp. 1–21.
- 1172 Mansour, J. S., A. Norlin, N. Llopis Monferrer, S. l’Helguen, and F. Not (2021). “Carbon and Nitrogen  
1173 Content to Biovolume Relationships for Marine Protist of the Rhizaria Lineage (Radiolaria and  
1174 Phaeodaria)”. In: *Limnology and Oceanography* 66.5, pp. 1703–1717.
- 1175 Martiny, J. B. H., B. J. M. Bohannan, J. H. Brown, R. K. Colwell, J. A. Fuhrman, J. L. Green, M. C. Horner-  
1176 Devine, M. Kane, J. A. Krumins, C. R. Kuske, P. J. Morin, S. Naeem, L. Øvreås, A.-L. Reysenbach,

- 1177 V. H. Smith, and J. T. Staley (2006). “Microbial Biogeography: Putting Microorganisms on the Map”.
- 1178 In: *Nature Reviews Microbiology* 4.2, pp. 102–112.
- 1179 McMinn, A., A. Martin, and K. Ryan (2010). “Phytoplankton and Sea Ice Algal Biomass and Physiology
- 1180 during the Transition between Winter and Spring (McMurdo Sound, Antarctica)”. In: *Polar Biology*
- 1181 33.11, pp. 1547–1556.
- 1182 McMurdie, P. J. and S. Holmes (2013). “Phyloseq: An r Package for Reproducible Interactive Analysis
- 1183 and Graphics of Microbiome Census Data”. In: *PLoS ONE* 8.4. pmid: [23630581](https://pubmed.ncbi.nlm.nih.gov/23630581/).
- 1184 Mestre, M., C. Ruiz-gonzález, R. Logares, C. M. Duarte, and J. M. Gasol (2018). “Sinking Particles
- 1185 Promote Vertical Connectivity in the Ocean Microbiome”. In: 115.29, pp. 6799–6807.
- 1186 Michaels, A. F., D. A. Caron, N. R. Swanberg, F. A. Howse, and C. M. Michaels (1995). “Planktonic Sar-
- 1187 codines (Acartaria, Radiolaria, Foraminifera) in Surface Waters near Bermuda: Abundance, Biomass
- 1188 and Vertical Flux”. In: *Journal of Plankton Research* 17.0, pp. 131–163.
- 1189 Mitra, A., K. J. Flynn, J. M. Burkholder, T. Berge, A. Calbet, J. A. Raven, E. Granéli, P. M. Glibert,
- 1190 P. J. Hansen, and D. K. Stoecker (2014). “The Role of Mixotrophic Protists in the Biological Carbon
- 1191 Pump”. In: *Biogeosciences* 11.4, pp. 995–1005.
- 1192 Mohan, R., A. A. Quarshi, T. Meloth, and M. Sudhakar (2011). “Diatoms from the Surface Waters of the
- 1193 Southern Ocean during the Austral Summer of 2004”. In: *Current Science*, pp. 1323–1327.
- 1194 Moline, M. A., H. Claustre, T. K. Frazer, O. Schofield, and M. Vernet (2004). “Alteration of the Food Web
- 1195 along the Antarctic Peninsula in Response to a Regional Warming Trend”. In: *Global Change Biology*
- 1196 10.12, pp. 1973–1980.
- 1197 Moon-van der Staay, S. Y., R. De Wachter, and D. Vaulot (2001). “Oceanic 18S rDNA Sequences from
- 1198 Picoplankton Reveal Unsuspected Eukaryotic Diversity”. In: *Nature* 409.6820, pp. 607–610.
- 1199 Morel, A. and S. Maritorena (2001). “Bio-optical Properties of Oceanic Waters: A Reappraisal”. In:
- 1200 *Journal of Geophysical Research: Oceans* 106.C4, pp. 7163–7180.
- 1201 Murphy, R. J., M. H. Pinkerton, K. M. Richardson, J. M. Bradford-Grieve, and P. W. Boyd (2001).
- 1202 “Phytoplankton Distributions around New Zealand Derived from SeaWiFS Remotely-Sensed Ocean
- 1203 Colour Data”. In: *New Zealand Journal of Marine and Freshwater Research* 35.2, pp. 343–362.



- 1204 Neil, H. L., L. Carter, and M. Y. Morris (2004). “Thermal Isolation of Campbell Plateau, New Zealand, by  
1205 the Antarctic Circumpolar Current over the Past 130 Kyr”. In: *Paleoceanography* 19.4, pp. 1–17.
- 1206 Nodder, S. D., S. M. Chiswell, and L. C. Northcote (2016). “Annual Cycles of Deep-ocean Biogeochemical  
1207 Export Fluxes in Subtropical and Subantarctic Waters, Southwest Pacific Ocean”. In: *Journal of*  
1208 *Geophysical Research: Oceans* 121.4, pp. 2405–2424.
- 1209 Nunes, S., M. Latasa, G. JM, and M. Estrada (2018). “Seasonal and Interannual Variability of Phytoplank-  
1210 ton Community Structure in a Mediterranean Coastal Site”. In: *Marine Ecology Progress Series* 592,  
1211 pp. 57–75.
- 1212 Nunes, S., M. Latasa, M. Delgado, M. Emelianov, R. Simó, and M. Estrada (2019). “Phytoplankton  
1213 Community Structure in Contrasting Ecosystems of the Southern Ocean: South Georgia, South  
1214 Orkneys and Western Antarctic Peninsula”. In: *Deep Sea Research Part I: Oceanographic Research*  
1215 *Papers* 151, p. 103059.
- 1216 Ohman, M. D., J. R. Powell, M. Picheral, and D. W. Jensen (2012). “Mesozooplankton and Particulate  
1217 Matter Responses to a Deep-Water Frontal System in the Southern California Current System”. In:  
1218 *Journal of Plankton Research* 34.9, pp. 815–827.
- 1219 Oksanen, J., G. Blanchet, M. Friendly, R. Kindt, P. Legendre, D. McGlinn, P. R. Minchin, R. O’Hara,  
1220 G. Simpson, P. Solymos, H. Stevens, E. Szoecs, and H. Wagner (2019). “Vegan: Community Ecology  
1221 Package. R Package Version 2.5–6. 2019”. In:
- 1222 Olguín, H. F. and V. A. Alder (2011). “Species Composition and Biogeography of Diatoms in Antarctic  
1223 and Subantarctic (Argentine Shelf) Waters (37–76 S)”. In: *Deep Sea Research Part II: Topical Studies*  
1224 *in Oceanography* 58.1-2, pp. 139–152.
- 1225 Ollison, G. A., S. K. Hu, L. Y. Mesrop, E. F. DeLong, and D. A. Caron (2021). “Come Rain or Shine:  
1226 Depth Not Season Shapes the Active Protistan Community at Station ALOHA in the North Pacific  
1227 Subtropical Gyre”. In: *Deep Sea Research Part I: Oceanographic Research Papers* 170, p. 103494.
- 1228 Olson, M. B. and S. L. Strom (2002). “Phytoplankton Growth, Microzooplankton Herbivory and Commu-  
1229 nity Structure in the Southeast Bering Sea: Insight into the Formation and Temporal Persistence of an  
1230 *Emiliana Huxleyi* Bloom”. In: *Deep-Sea Research Part II-Topical Studies in Oceanography* 49.26,  
1231 pp. 5969–5990.

- 1232 Paerl, R., E. Bertrand, A. Allen, B. Palenik, and F. Azam (2015). “Vitamin B1 Ecophysiology of Marine  
1233 Picoeukaryotic Algae: Strain-specific Differences and a New Role for Bacteria in Vitamin Cycling”.  
1234 In: *Limnology and Oceanography* 60.1, pp. 215–228.
- 1235 Panzeca, C., A. Tovar-Sanchez, S. Agustí, I. Reche, C. M. Duarte, G. T. Taylor, and S. A. Sañudo-Wilhelmy  
1236 (2006). “B Vitamins as Regulators of Phytoplankton Dynamics”. In: *Eos, Transactions American*  
1237 *Geophysical Union* 87.52, pp. 593–596.
- 1238 Peloquin, J., J. Hall, K. Safi, W. O. Smith, S. Wright, and R. van den Enden (2011). “The Response  
1239 of Phytoplankton to Iron Enrichment in Sub-Antarctic HNLC Waters: Results from the SAGE  
1240 Experiment”. In: *Deep Sea Research Part II: Topical Studies in Oceanography* 58.6, pp. 808–823.
- 1241 Pinkernell, S. and B. Beszteri (2014). “Potential Effects of Climate Change on the Distribution Range of  
1242 the Main Silicate Sinker of the Southern Ocean”. In: *Ecology and Evolution* 4.16, pp. 3147–3161.
- 1243 Pinkerton, M. H., K. M. Richardson, P. W. Boyd, M. P. Gall, J. Zeldis, M. D. Oliver, and R. J. Murphy  
1244 (2005). “Intercomparison of Ocean Colour Band-Ratio Algorithms for Chlorophyll Concentration in  
1245 the Subtropical Front East of New Zealand”. In: *Remote Sensing of Environment* 97.3, pp. 382–402.
- 1246 Piredda, R., M. P. Tomasino, A. M. D’Erchia, C. Manzari, G. Pesole, M. Montresor, W. H. Kooistra,  
1247 D. Sarno, and A. Zingone (2017). “Diversity and Temporal Patterns of Planktonic Protist Assemblages  
1248 at a Mediterranean Long Term Ecological Research Site”. In: *FEMS microbiology ecology* 93.1. pmid:  
1249 [27677681](https://pubmed.ncbi.nlm.nih.gov/27677681/).
- 1250 Piwosz, K., J. M. Wiktor, A. Niemi, A. Tatarek, and C. Michel (2013). “Mesoscale Distribution and  
1251 Functional Diversity of Picoeukaryotes in the First-Year Sea Ice of the Canadian Arctic”. In: *The ISME*  
1252 *journal* 7.8, pp. 1461–1471.
- 1253 Pörtner, H.-O., D. M. Karl, P. W. Boyd, W. Cheung, S. E. Lluch-Cota, Y. Nojiri, D. N. Schmidt, P. O.  
1254 Zavialov, J. Alheit, and J. Aristegui (2014). “Ocean Systems”. In: *Climate Change 2014: Impacts,*  
1255 *Adaptation, and Vulnerability. Part A: Global and Sectoral Aspects. Contribution of Working Group*  
1256 *II to the Fifth Assessment Report of the Intergovernmental Panel on Climate Change*. Cambridge  
1257 University Press, pp. 411–484.

- 1258 Preston, C. M., C. A. Durkin, and K. M. Yamahara (2020). “DNA Metabarcoding Reveals Organisms  
1259 Contributing to Particulate Matter Flux to Abyssal Depths in the North East Pacific Ocean”. In: *Deep*  
1260 *Sea Research Part II: Topical Studies in Oceanography* 173.
- 1261 Quéguiner, B., P. Tréguer, I. Peeken, and R. Scharek (1997). “Biogeochemical Dynamics and the Silicon  
1262 Cycle in the Atlantic Sector of the Southern Ocean during Austral Spring 1992”. In: *Deep Sea Research*  
1263 *Part II: Topical Studies in Oceanography* 44.1-2, pp. 69–89.
- 1264 Raes, E. J., L. Bodrossy, J. Van De Kamp, A. Bissett, M. Ostrowski, M. V. Brown, S. L. S. Sow, B. Sloyan,  
1265 and A. M. Waite (2018). “Oceanographic Boundaries Constrain Microbial Diversity Gradients in the  
1266 South Pacific Ocean”. In: *Proceedings of the National Academy of Sciences* 115.35, E8266–E8275.
- 1267 Rigual-Hernández, A. S., T. W. Trull, J. A. Flores, S. D. Nodder, R. Eriksen, D. M. Davies, G. M.  
1268 Hallegraeff, F. J. Sierro, S. M. Patil, A. Cortina, A. M. Ballegeer, L. C. Northcote, F. Abrantes, and  
1269 M. M. Rufino (2020). “Full Annual Monitoring of Subantarctic *Emiliana Huxleyi* Populations Reveals  
1270 Highly Calcified Morphotypes in High-CO<sub>2</sub> Winter Conditions”. In: *Scientific Reports* 10.1, p. 2594.
- 1271 Rigual-Hernández, A., T. Trull, S. Bray, A. Cortina, and L. Armand (2015). “Latitudinal and Temporal  
1272 Distributions of Diatom Populations in the Pelagic Waters of the Subantarctic and Polar Frontal  
1273 Zones of the Southern Ocean and Their Role in the Biological Pump”. In: *Biogeosciences* 12.18,  
1274 pp. 5309–5337.
- 1275 Rodríguez, F., E. Derelle, L. Guillou, F. Le Gall, D. Vaultot, and H. Moreau (2005). “Ecotype Diversity in the  
1276 Marine Picoeukaryote *Ostreococcus* (Chlorophyta, Prasinophyceae)”. In: *Environmental microbiology*  
1277 7.6, pp. 853–859.
- 1278 Ruiz-Gonzalez, C., M. Mestre, M. Estrada, M. Sebastian, G. Salazar, S. Agust, E. Moreno-Ostos, I.  
1279 Reche, X. A. Alvarez-Salgado, X. A. G. Moran, C. M. Duarte, M. M. Sala, and J. M. Gasol (2020).  
1280 “Major Imprint of Surface Plankton on Deep Ocean Prokaryotic Structure and Activity”. In: *Molecular*  
1281 *Ecology* 29.10, pp. 1820–1838.
- 1282 Saavedra-Pellitero, M., K.-H. Baumann, J.-A. Flores, and R. Gersonde (2014). “Biogeographic Distribution  
1283 of Living Coccolithophores in the Pacific Sector of the Southern Ocean”. In: *Marine Micropaleontology*  
1284 109, pp. 1–20.

- 1285 Saito, H., T. Ota, K. Suzuki, J. Nishioka, and A. Tsuda (2006). “Role of Heterotrophic Dinoflagellate  
1286 Gyrodinium Sp in the Fate of an Iron Induced Diatom Bloom”. In: *Geophysical Research Letters* 33.9.
- 1287 Santoferrara, L., F. Burki, S. Filker, R. Logares, M. Dunthorn, and G. B. McManus (2020). “Perspectives  
1288 from Ten Years of Protist Studies by High-Throughput Metabarcoding”. In: *Journal of Eukaryotic*  
1289 *Microbiology*, jeu.12813.
- 1290 Sañudo-Wilhelmy, S. A., L. Gómez-Consarnau, C. Suffridge, and E. A. Webb (2014). “The Role of B  
1291 Vitamins in Marine Biogeochemistry”. In: *Annual review of marine science* 6, pp. 339–367.
- 1292 Sarmiento, J. L., R. Slater, R. Barber, L. Bopp, S. C. Doney, a. C. Hirst, J. Kleypas, R. Matear, U.  
1293 Mikolajewicz, P. Monfray, V. Soldatov, S. a. Spall, and R. Stouffer (2004). “Response of Ocean  
1294 Ecosystems to Climate Warming”. In: *Global Biogeochemical Cycles* 18.3, n/a–n/a.
- 1295 Sato, M., S. Takeda, and K. Furuya (2009). “Responses of Pico- and Nanophytoplankton to Artificial Iron  
1296 Infusions Observed during the Second Iron Enrichment Experiment in the Western Subarctic Pacific  
1297 (SEEDS II)”. In: *Deep-Sea Research Part II: Topical Studies in Oceanography* 56.26, pp. 2745–2754.
- 1298 Schneider, L. K., K. Anestis, J. Mansour, A. A. Anschütz, N. Gypens, P. J. Hansen, U. John, K. Klemm,  
1299 J. L. Martin, and N. Medic (2020). “A Dataset on Trophic Modes of Aquatic Protists”. In: *Biodiversity*  
1300 *data journal* 8.
- 1301 Schofield, O., G. Saba, K. Coleman, F. Carvalho, N. Couto, H. Ducklow, Z. Finkel, A. Irwin, A. Kahl,  
1302 T. Miles, M. Montes-Hugo, S. Stammerjohn, and N. Waite (2017). “Decadal Variability in Coastal  
1303 Phytoplankton Community Composition in a Changing West Antarctic Peninsula”. In: *Deep Sea*  
1304 *Research Part I: Oceanographic Research Papers* 124, pp. 42–54.
- 1305 Seymour, J. R., M. A. Doblin, T. C. Jeffries, M. V. Brown, K. Newton, P. J. Ralph, M. Baird, and J. G.  
1306 Mitchell (2012). “Contrasting Microbial Assemblages in Adjacent Water Masses Associated with the  
1307 East Australian Current”. In: *Environmental Microbiology Reports* 4.5, pp. 548–555.
- 1308 Sherlock, V., S. Pickmere, K. Currie, M. Hadfield, S. Nodder, and P. Boyd (2007). “Predictive Accuracy  
1309 of Temperature-nitrate Relationships for the Oceanic Mixed Layer of the New Zealand Region”. In:  
1310 *Journal of Geophysical Research: Oceans* 112.C6.

- 1311 Sherr, E. B. and B. F. Sherr (2007). “Heterotrophic Dinoflagellates: A Significant Component of Micro-  
1312 zooplankton Biomass and Major Grazers of Diatoms in the Sea”. In: *Marine Ecology Progress Series*  
1313 352, pp. 187–197.
- 1314 Shi, X. L., D. Marie, L. Jardillier, D. J. Scanlan, and D. Vaulot (2009). “Groups without Cultured  
1315 Representatives Dominate Eukaryotic Picophytoplankton in the Oligotrophic South East Pacific  
1316 Ocean”. In: *PloS one* 4.10, e7657.
- 1317 Smith, R. O., R. Vennell, H. C. Bostock, and M. J. Williams (2013). “Interaction of the Subtropical Front  
1318 with Topography around Southern New Zealand”. In: *Deep Sea Research Part I: Oceanographic*  
1319 *Research Papers* 76, pp. 13–26.
- 1320 Sow, L. S. S., T. W. Trull, and L. Bodrossy (2020). “Oceanographic Fronts Shape Phaeocystis Assemblages:  
1321 A High-Resolution 18S rRNA Gene Survey from the Ice-Edge to the Equator of the South Pacific”. In:  
1322 *Frontiers in Microbiology* 11, p. 1847.
- 1323 Stanton, B. R. and M. Y. Morris (2004). “Direct Velocity Measurements in the Subantarctic Front and over  
1324 Campbell Plateau, Southeast of New Zealand”. In: *Journal of Geophysical Research: Oceans* 109.C1.
- 1325 Stanton, B. R., P. J. Sutton, and S. M. Chiswell (1997). “The East Auckland Current, 1994–95”. In: *New*  
1326 *Zealand journal of marine and freshwater research* 31.4, pp. 537–549.
- 1327 Strom, S. L., M. A. Brainard, J. L. Holmes, and M. B. Olson (2001). “Phytoplankton Blooms Are Strongly  
1328 Impacted by Microzooplankton Grazing in Coastal North Pacific Waters”. In: *Marine Biology* 138.2,  
1329 pp. 355–368.
- 1330 Stukel, M. R., M. D. Ohman, T. B. Kelly, and T. Biard (2019). “The Roles of Suspension-Feeding and  
1331 Flux-Feeding Zooplankton as Gatekeepers of Particle Flux into the Mesopelagic Ocean in the Northeast  
1332 Pacific”. In: *FRONTIERS IN MARINE SCIENCE* 6.
- 1333 Sutton, P. (2001). “Detailed Structure of the Subtropical Front over Chatham Rise, East of New Zealand”.  
1334 In: *Journal of Geophysical Research: Oceans* 106.C12, pp. 31045–31056.
- 1335 Sutton, P. J. (2003). “The Southland Current: A Subantarctic Current”. In: *New Zealand Journal of Marine*  
1336 *and Freshwater Research* 37.3, pp. 645–652.
- 1337 Sutton, P. J. and M. Bowen (2014). “Flows in the Tasman Front South of Norfolk Island”. In: *Journal of*  
1338 *Geophysical Research: Oceans* 119.5, pp. 3041–3053.

- 1339 Suzuki, K., H. Saito, T. Isada, A. Hattori-Saito, H. Kiyosawa, J. Nishioka, R. M. L. McKay, A. Kuwata,  
1340 and A. Tsuda (2009). “Community Structure and Photosynthetic Physiology of Phytoplankton in the  
1341 Northwest Subarctic Pacific during an in Situ Iron Fertilization Experiment (SEEDS-II)”. In: *Deep*  
1342 *Sea Research Part II: Topical Studies in Oceanography* 56.26, pp. 2733–2744.
- 1343 Suzuki, N. and F. Not (2015). “Biology and Ecology of Radiolaria”. In: ed. by S. Ohtsuka, T. Suzaki,  
1344 T. Horiguchi, N. Suzuki, and F. Not. Japan: Springer, pp. 179–222.
- 1345 Swan, C. M., M. Vogt, N. Gruber, and C. Laufkoetter (2016). “A Global Seasonal Surface Ocean  
1346 Climatology of Phytoplankton Types Based on CHEMTAX Analysis of HPLC Pigments”. In: *Deep*  
1347 *Sea Research Part I: Oceanographic Research Papers* 109, pp. 137–156.
- 1348 Takahashi, K. (1983). “Radiolaria - Sinking Population, Standing Stock, and Production-Rate”. In: *Marine*  
1349 *Micropaleontology* 8.3, pp. 171–181.
- 1350 Techtmann, S. M., J. L. Fortney, K. A. Ayers, D. C. Joyner, T. D. Linley, S. M. Pfiffner, and T. C. Hazen  
1351 (2015). “The Unique Chemistry of Eastern Mediterranean Water Masses Selects for Distinct Microbial  
1352 Communities by Depth”. In: *PLOS ONE* 10.3, e0120605.
- 1353 Thiele, S., C. Wolf, I. K. Schulz, P. Assmy, K. Metfies, and B. M. Fuchs (2014). “Stable Composition of  
1354 the Nano-and Picoplankton Community during the Ocean Iron Fertilization Experiment LOHAFEX”.  
1355 In: *PloS one* 9.11, e113244.
- 1356 Timmermans, K., B. Van der Wagt, M. Veldhuis, A. Maatman, and H. De Baar (2005). “Physiological  
1357 Responses of Three Species of Marine Pico-Phytoplankton to Ammonium, Phosphate, Iron and Light  
1358 Limitation”. In: *Journal of Sea Research* 53.1-2, pp. 109–120.
- 1359 Tragin, M. and D. Vaultot (2018). “Green Microalgae in Marine Coastal Waters: The Ocean Sampling Day  
1360 (OSD) Dataset”. In: *Scientific Reports* 8.1, p. 14020.
- 1361 — (2019). “Novel Diversity within Marine Mamiellophyceae (Chlorophyta) Unveiled by Metabarcoding”.  
1362 In: *Scientific Reports* 9.1, p. 5190. arXiv: [449298](https://arxiv.org/abs/449298).
- 1363 Trefault, N., R. De la Iglesia, M. Moreno-Pino, A. Lopes dos Santos, C. G erikas Ribeiro, G. Parada-Pozo,  
1364 A. Cristi, D. Marie, and D. Vaultot (2021). “Annual Phytoplankton Dynamics in Coastal Waters from  
1365 Fildes Bay, Western Antarctic Peninsula”. In: *Scientific Reports* 11.1, p. 1368.

- 1366 Trull, T. W., P. N. Sedwick, F. B. Griffiths, and S. R. Rintoul (2001). “Introduction to Special Section:  
1367 SAZ Project”. In: *JOURNAL OF GEOPHYSICAL RESEARCH-OCEANS* 106.C12, pp. 31425–31429.
- 1368 Turner, J. T. (2015). “Zooplankton Fecal Pellets, Marine Snow, Phytodetritus and the Ocean’s Biological  
1369 Pump”. In: *Progress in Oceanography* 130, pp. 205–248.
- 1370 Twining, B. S., S. D. Nodder, A. L. King, D. A. Hutchins, G. R. LeClerc, J. M. DeBruyn, E. W. Maas,  
1371 S. Vogt, S. W. Wilhelm, and P. W. Boyd (2014). “Differential Remineralization of Major and Trace  
1372 Elements in Sinking Diatoms”. In: *Limnology and Oceanography* 59.3, pp. 689–704.
- 1373 Uitz, J., H. Claustre, A. Morel, and S. B. Hooker (2006). “Vertical Distribution of Phytoplankton Com-  
1374 munities in Open Ocean: An Assessment Based on Surface Chlorophyll”. In: *Journal of Geophysical  
1375 Research: Oceans* 111.C8.
- 1376 Vargas, C. D., S. Audic, N. Henry, J. Decelle, F. Mahé, R. Logares, E. Lara, C. Berney, N. L. Bescot,  
1377 I. Probert, M. Carmichael, J. Poulain, and S. Romac (2015). “Eukaryotic Plankton Diversity in the  
1378 Sunlit Ocean”. In: *Science* 348.6237, pp. 1–12.
- 1379 Verity, P. G., C. P. Brussaard, J. C. Nejstgaard, M. A. van Leeuwe, C. Lancelot, and L. K. Medlin (2007).  
1380 “Current Understanding of Phaeocystis Ecology and Biogeochemistry, and Perspectives for Future  
1381 Research”. In: *Biogeochemistry* 83.1, pp. 311–330.
- 1382 Vidussi, F., H. Claustre, B. B. Manca, A. Luchetta, and J.-C. Marty (2001). “Phytoplankton Pigment  
1383 Distribution in Relation to Upper Thermocline Circulation in the Eastern Mediterranean Sea during  
1384 Winter”. In: *Journal of Geophysical Research: Oceans* 106.C9, pp. 19939–19956.
- 1385 Vidussi, F., J.-c. Marty, and J. Chiave (2000). “Phytoplankton Pigment Variations during the Transition  
1386 from Spring Bloom to Oligotrophy in the Northwestern Mediterranean Sea”. In: *Deep-Sea Research*  
1387 47.
- 1388 Wietz, M., S. C. Lau, and T. Harder (2019). “Editorial: Socio-Ecology of Microbes in a Changing Ocean”.  
1389 In: *Frontiers in Marine Science* 6, p. 190.
- 1390 Wolf, C., S. Frickenhaus, E. S. Kiliyas, I. Peeken, and K. Metfies (2014). “Protist Community Composition  
1391 in the Pacific Sector of the Southern Ocean during Austral Summer 2010”. In: *Polar Biology* 37.3,  
1392 pp. 375–389.

- 1393 Zeldis, J. R. and M. Décima (2020). “Mesozooplankton Connect the Microbial Food Web to Higher  
1394 Trophic Levels and Vertical Export in the New Zealand Subtropical Convergence Zone”. In: *Deep Sea*  
1395 *Research Part I: Oceanographic Research Papers* 155, p. 103146.
- 1396 Zentara, S. and D. Kamykowski (1981). “Geographic Variations in the Relationship between Silicic Acid  
1397 and Nitrate in the South Pacific Ocean”. In: *Deep Sea Research A* 28, pp. 455–465.
- 1398 Zhu, F., R. Massana, F. Not, D. Marie, and D. Vaultot (2005). “Mapping of Picoeucaryotes in Marine  
1399 Ecosystems with Quantitative PCR of the 18S rRNA Gene”. In: *FEMS microbiology ecology* 52.1,  
1400 pp. 79–92.
- 1401 Zoccarato, L., A. Pallavicini, F. Cerino, S. Fonda Umani, and M. Celussi (2016). “Water Mass Dynamics  
1402 Shape Ross Sea Protist Communities in Mesopelagic and Bathypelagic Layers”. In: *Progress in*  
1403 *Oceanography* 149, pp. 16–26.



## 1404 **7. ACKNOWLEDGEMENTS**

1405 We acknowledge the crew of RV *Tangaroa* and RV *Kaharoa* for their efforts in facilitating the sampling  
1406 throughout all the voyages included in this work. We thank Els Maas and Cliff Law for collecting DNA  
1407 samples during KAH1303 voyage and for sharing the physical and chemical data obtained in. this voyage.  
1408 Thank you to Daniel Vaultot for critical feedback on PR2 references and assignation. We are thankful to  
1409 the anonymous reviewers for their efforts and constructive comments that helped improve the manuscript.  
1410 We are grateful to the Royal Society of New Zealand which funded this research through the Catalyst  
1411 Seeding General fund (grant reference number 16-NIW-009-CSG) and foster the collaboration between  
1412 the Station Biologique de Roscoff and NIWA. This work is also supported by NIWA via the New Zealand  
1413 Ministry of Business, Innovation and Employment's Strategic Science Investment Funding to the National  
1414 Coasts Oceans Center. ALS was supported by the Singapore Ministry of Education, Academic Research  
1415 Fund Tier 1 (RG26/19).

## 1416 **8. AUTHOR CONTRIBUTION STATEMENT**

- 1417 • Andres Gutiérrez-Rodríguez: Conceptualization, Methodology, Formal analysis, Investigation, Data  
1418 curation, Visualization, Writing - Original Draft & Funding acquisition
- 1419 • Adriana Lopes dos Santos: Conceptualization, Methodology, Investigation, Data curation, Writing -  
1420 Original Draft & Funding acquisition.
- 1421 • Karl Safi: Investigation, Writing - Review & Editing.
- 1422 • Ian Probert: Conceptualization, Writing - Review & Editing and Funding acquisition.
- 1423 • Fabrice Not: Conceptualization, Writing - Review & Editing and Funding acquisition.
- 1424 • Denise Fernandez: Conceptualization, Writing - Review & Editing
- 1425 • Jaret Bilewitch: Methodology, Writing - Review & Editing
- 1426 • Debbie Hulston: Methodology, Writing - Review & Editing
- 1427 • Matt Pinkerton: Writing - Review, Editing & Funding acquisition.
- 1428 • Scott D Nodder: Conceptualization, Investigation, Data curation, Writing - Original Draft & Funding  
1429 acquisition.

## 1430 **List of Tables**

1431 **Table. 1** Summary of cruises from which samples were collected. Information includes  
1432 the cruise identification code, start and end dates, the project or region, the water  
1433 masses surveyed, latitudinal and seasonal coverage, number of stations and samples  
1434 collected in each cruise.

1435 **Table. 2** Summary of PERMANOVA analysis including the Water-mass and Region as  
1436 categorical variables in addition to the continuous environmental variables. Tem-  
1437 perature and salinity represent the surface values. Nitrate ( $\text{NO}_3^-$ ) and chlorophyll  
1438 *a* (Chl *a*) median concentration calculated for samples within the euphotic zone.  
1439 Analysis was conducted with the Adonis function of the vegan R package

1440 **Table. S1** Supplementary Table S1. Table with the number of samples, the median number  
1441 of reads per sample and the number of ASVs in the entire dataset and within each  
1442 water mass.

1443 **Table. S2** Supplementary Table S2. Summary of PERMANOVA analysis results conducted  
1444 to calculate the significance of environmental variables ability to explain ASV com-  
1445 position on a subset of 188 samples collected from STW (n=34), STF (n=53), SAW  
1446 (n=95) for which measurements of presented variables were available. Analysis  
1447 was conducted with the Adonis function of the vegan R package.

## 1448 List of Figures

- 1449 Fig. 1 Study area. (A) Map of the study area with the sampling sites locations. (B) T-S  
1450 diagram with oxygen concentration. Surface (C) temperature (C) and (D) nitrate  
1451 concentration (D) at sampling sites in relation to major water masses and currents  
1452 and fronts of the study region. North (N-STF) and South Subtropical Front (S-STF)  
1453 adapted from Smith et al. 2013
- 1454 Fig. 2 Surface mixed-layer physico-chemical variability. Box-plot representation of sur-  
1455 face mixed-layer temperature and salinity, nitrate and chlorophyll a concentration  
1456 in each water mass. Box-plots show the median, the first and third quartiles (lower  
1457 and upper hinges) and the values within (line) and outside (dots) the  $\pm 1.5 * IQR$   
1458 (IQR, interquartile range).
- 1459 Fig. 3 Species richness and diversity index estimated for (A) the euphotic zone of each  
1460 water masses (SAW, STF, and STW); (B) the euphotic zone of each regions and (C)  
1461 the aphotic zone of the Biophysical Mooring programme sites SAF (Subantarctic  
1462 Front) and Campbell Plateau correspond to the same voyage TAN1702 (April  
1463 2017).
- 1464 Fig. 4 Figure 4. (A) Principal component analysis based on ASV composition of euphotic  
1465 samples only color coded by water masses and shapes for regions/voyages (n=240).  
1466 (B) Biplot of redundancy analysis (RDA) computed at species (ASV) level in the  
1467 euphotic zone for which T, Sal, Nitrate and Chl *a* measurements were available.  
1468 Arrows indicate the sign and strength of the correlation between community com-  
1469 position an environmental variables that were significant in PERMANOVA analysis  
1470 (n=197) samples from Chatham Rise TAN1516 lack CTD and MLD data

1471 Fig. 5 Protist community composition at division/class level (syndiniales excluded) in the  
1472 euphotic zone of STW, STF and SAW. A) The area of each taxonomic group in the  
1473 treemap represents the read abundances affiliated to each group standardized to the  
1474 median sequencing depth across samples [ $\text{median sum otus} * (\text{otu reads} / \text{sum (otu reads)})$ ]. B) Barplots represent the mean relative read abundance of most abundant  
1475 classes across different water masses (error bars are the standard deviation of the  
1476 mean).

1478 Fig. 6 Box-plots showing standardized read abundance in subtropical, subantarctic and  
1479 subtropical front of the twentieth most abundant protist classes in the euphotic zone.  
1480 Box-plots show the median, the first and third quartiles (lower and upper hinges)  
1481 and the values within the  $\pm 1.5 * IQR$  (IQR, interquartile range) (line). Points  
1482 represent values of single samples.

1483 Fig. 7 Relative read abundance of main protistan classes in samples collected throughout  
1484 the water column (0-2000 m) during multiple voyages to the Biophysical Moorings  
1485 program sites in STW (Bio-STM), STF (Bio-STF) and SAW (Bio-SAM) and mean  
1486 contribution for the whole sampling program ( $n = 113$ )(error bars as in Figure 4.

1487 Fig. 8 Water mass genus and species abundance (A) Treemaps showing the community  
1488 composition at class/genus level in the euphotic zone of the STW, STF and SAW.  
1489 The area of taxonomic group is proportional to the read abundances affiliated to  
1490 each group standardized to the median sequencing depth across samples [ $\text{median}$   
1491  $\text{sum otus} * (\text{otu reads} / \text{sum (otu reads)})$ ]. (B) Mean standardized read abundance of  
1492 most abundant ASVs and assigned species, color coded for their class affiliation, in  
1493 the euphotic zone of the different water masses.

1494 Fig. 9 Heatmap showing the standardized read abundance of the 50 most abundant species  
1495 (Y-axis) across samples collected in the euphotic zone (X-axis). Samples were  
1496 clustered using nMDS and Jaccard distance and sample labels color coded according  
1497 to the water mass and region they were collected from. Species were organized and  
1498 color coded by class affiliation.

- 1499 Fig. S1 Supplementary Figure S1. Number of DNA samples from each water mass surveyed  
1500 in different (A) cruises, (B) regions, (C) months of the year, and (D) photic zone.
- 1501 Fig. S2 Supplementary Figure S2. Density distribution of DNA samples across latitude, sea-  
1502 son, and mixed-layer temperature, salinity nitrate, and chlorophyll *a* concentrations  
1503 in each water mass surveyed.
- 1504 Fig. S3 Supplementary Figure S3. Phytoplankton community size-structure. Box-plots  
1505 show the chlorophyll *a* concentration associated to pico-, nano-, and micro-phytoplankton  
1506 nominal size fractions (0.2-2  $\mu\text{m}$ , 2-20  $\mu\text{m}$ , >20  $\mu\text{m}$ ) in the surface mixed-layer  
1507 of each water masses. Each dot correspond to a single sample. Box-plots show  
1508 the median, first and third quartiles and the values within the  $\pm 1.5 * IQR$  (IQR,  
1509 interquartile range). The figure includes data from TAN1516/Chatham Rise,  
1510 TAN1702/Campbell Plateau, TAN1212/Spring Bloom, TAN1203/SOAP;  $n = 102$ .
- 1511 Fig. S4 Supplementary Figure S4. Protist diversity richness and Shannon diversity index  
1512 binned in 5° latitude bins and color coded by (A) water mass and (B) regions.
- 1513 Fig. S5 Supplementary Figure S5. Diversity and temperature. Protist diversity richness and  
1514 Shannon diversity index binned in 5° latitude bins and color coded by (A) water  
1515 mass and (B) regions.
- 1516 Fig. S6 Supplementary Figure S6. Diversity and trophic conditions. Mean protist diversity  
1517 richness in relation to nitrate and chlorophyll *a* concentrations in the euphotic zone  
1518 and binned in four ranks and color coded by (A) temperature and (B) water mass.  
1519 Function ntile was used to break individual measurements into buckets of the same  
1520 size.
- 1521 Fig. S7 Supplementary Figure S7. Principal component analysis based on ASV composition  
1522 of all samples coded by symbol color and shape, respectively, for the light layer  
1523 and water masses where the samples were collected from.

- 1524 Fig. S8 Supplementary Figure S8. Treemaps showing the mean relative abundance of main  
1525 protistan groups divisions, class and genus in the aphotic zone of the STW, STF,  
1526 and SAW sites. The area of each taxonomic group in the treemap represents the  
1527 read abundances affiliated to each group standardized to the median sequencing  
1528 depth across samples [ $\text{median sum otus} * (\text{otu reads} / \text{sum (otu reads)})$ ]
- 1529 Fig. S9 Supplementary Figure S9. Treemaps showing the mean relative abundance of main  
1530 protistan classes and species within major taxonomic divisions in the euphotic zone  
1531 of STW, STF, and SAW water masses.
- 1532 Fig. S10 Supplementary Figure S10. Mean standardized read abundance of most abundant  
1533 ASVs and assigned species in the euphotic zone of different regions and voyages,  
1534 color coded for their class affiliation.
- 1535 Fig. S11 Supplementary Figure S11. Results from DESeq2 analysis depicting the species  
1536 (Y-axis) with significantly different distribution between the euphotic zone of STW,  
1537 SAW and STF waters. Difference in the distribution is expressed as the log<sub>2</sub> fold  
1538 change of the difference (X-axis). Each dot correspond to a different ASV color  
1539 coded by their class affiliation.
- 1540 Fig. S12 Supplementary Figure S12. Heatmap showing the abundance patterns of the top20  
1541 most abundant species in the aphotic zone of the Biophysical Mooring samples.  
1542 Read abundance were normalized to mean sequencing depth. Samples are clustered  
1543 using nMDS and Jaccard distance, and color coded according to the sampling site  
1544 they were collected from (Bio-STM, purple; Bio-STF, green; Bio-SAM, blue).  
1545 Species were organized and color coded by class affiliation.
- 1546 Fig. S13 Supplementary Figure S13. Mean standardized read abundance of most abundant  
1547 ASVs and assigned species in the aphotic zone of different water masses. Bars  
1548 corresponding to each species color coded for their class affiliation.

1549 Fig. S14 Supplementary Figure S14. Results from DESeq2 analysis depicting the species  
1550 (Y-axis) with significantly different distribution between the aphotic zone of STW,  
1551 SAW and STF waters. Difference in the distribution is expressed as the log<sub>2</sub> fold  
1552 change of the difference (X-axis). Each dot correspond to a different ASV color  
1553 coded by their class affiliation.

1554 Fig. S15 Supplementary Figure S15. Box-plots showing standardized read abundance of  
1555 twentieth most abundant protist classes in the euphotic zone of different regions  
1556 and color coded by different water masses. Box-plots show the median, the first  
1557 and third quartiles (lower and upper hinges) and the values within the  $\pm 1.5 * IQR$   
1558 (IQR, interquartile range) (line). Points represent values of single samples

1559 Fig. S16 Supplementary Figure S16. Relative read abundance of main protistan classes in  
1560 samples collected during different voyages and regions within the STW, STF and  
1561 SAW water masses.

1562 Fig. S17 Supplementary Figure S17. (A) Matrix showing the number of nucleotide mis-  
1563 matches in the v4 region of the 18S rRNA between the most abundant ASVs  
1564 assigned to *F. sublineata* and the annotated sequences for this and *F. kerguelensis*  
1565 species included in PR2 reference database. (B) mean relative abundance of these  
1566 ASVs in the euphotic zone of different water masses and regions. (C) distribution  
1567 of these ASVs abundance (standardized read abundance) in each euphotic sample  
1568 in relation to latitude and color coded by region.



1569

# **Planktonic protist diversity across contrasting Subtropical and Subantarctic waters of the southwest Pacific**

1570

1571

1572 [1,\*]Andres Gutiérrez-Rodríguez [2]Adriana Lopes dos Santos [3]Karl Safi [4]Ian Probert [5]Fabrice

1573 Not [1]Denise Fernández [3]Priscillia Gourvil [1]Jaret Bilewitch [1]Debbie Hulston [1]Matt Pinkerton

1574 [1]Scott D Nodder

1575

## **Supplementary Material**

1576 **9. SUPPLEMENTARY MATERIAL**

| Water mass | N samples  | N reads (median) | N ASVs       |
|------------|------------|------------------|--------------|
| <b>All</b> | <b>482</b> | <b>15913</b>     | <b>16861</b> |
| SAW        | 120        | 17158            | 7377         |
| STF        | 91         | 16431            | 4261         |
| STW        | 271        | 15630            | 12407        |

**Table S1.** Supplementary Table S1. Table with the number of samples, the median number of reads per sample and the number of ASVs in the entire dataset and within each water mass.

| Variable               | Df  | SumsOfSqs | MeanSqs | F.Model | R2      | Pr(>F) |
|------------------------|-----|-----------|---------|---------|---------|--------|
| Temperature            | 1   | 4.929     | 4.9288  | 21.639  | 0.08489 | 0.001  |
| Salinity               | 1   | 7.831     | 7.8308  | 34.38   | 0.13487 | 0.001  |
| median NO <sub>3</sub> | 1   | 3.362     | 3.3617  | 14.759  | 0.0579  | 0.001  |
| median Chla            | 1   | 1.625     | 1.6246  | 7.133   | 0.02798 | 0.001  |
| Residuals              | 177 | 40.316    | 0.2278  |         | 0.69436 |        |
| Total                  | 181 | 58.062    |         |         | 1       |        |

**Table S2.** Supplementary Table S2. Summary of PERMANOVA analysis results conducted to calculate the significance of environmental variables ability to explain ASV composition on a subset of 188 samples collected from STW (n=34), STF (n=53), SAW (n=95) for which measurements of presented variables were available. Analysis was conducted with the Adonis function of the vegan R package.

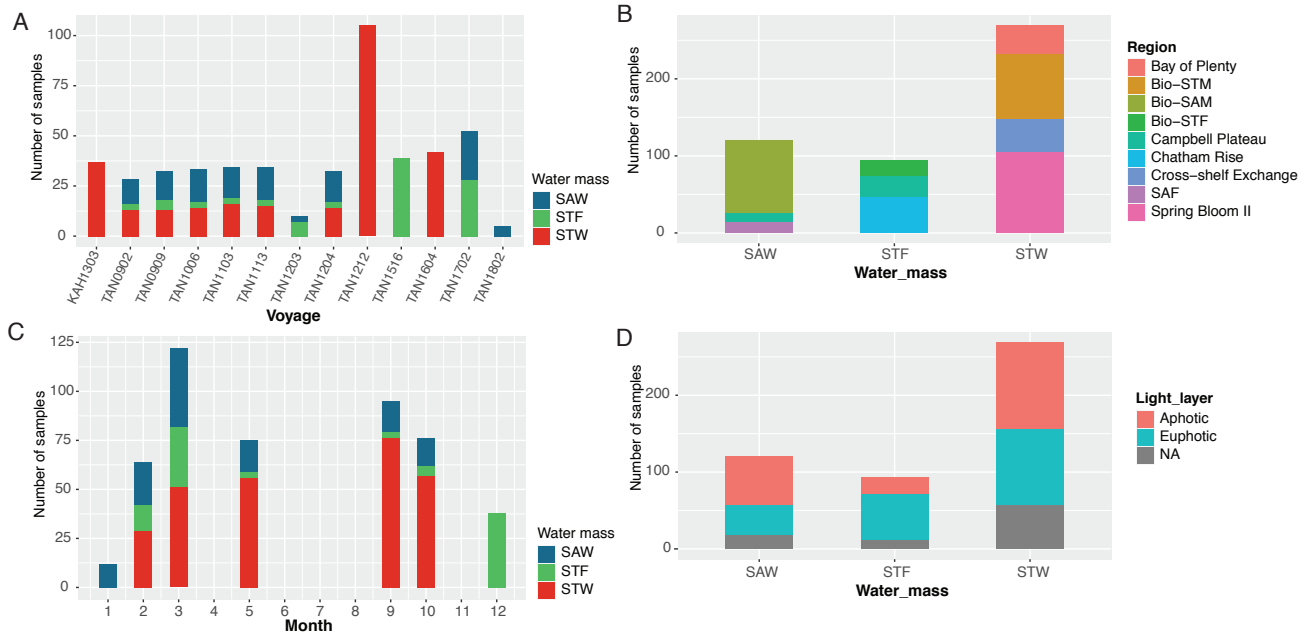

**Figure S1.** Supplementary Figure S1. Number of DNA samples from each water mass surveyed in different (A) cruises, (B) regions, (C) months of the year, and (D) photic zone.

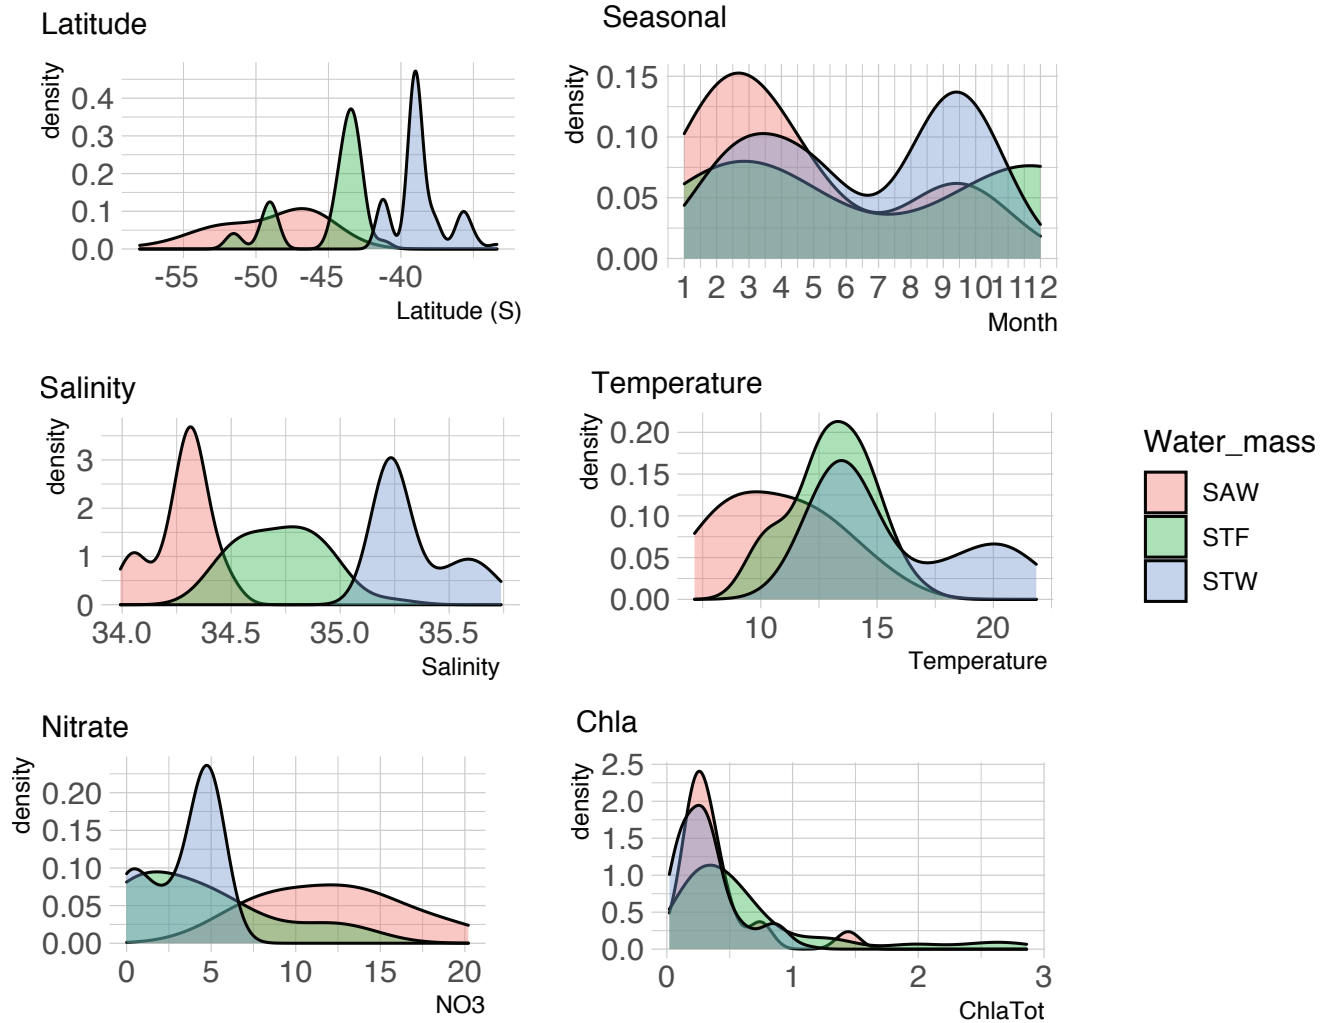

**Figure S2.** Supplementary Figure S2. Density distribution of DNA samples across latitude, season, and mixed-layer temperature, salinity nitrate, and chlorophyll *a* concentrations in each water mass surveyed.

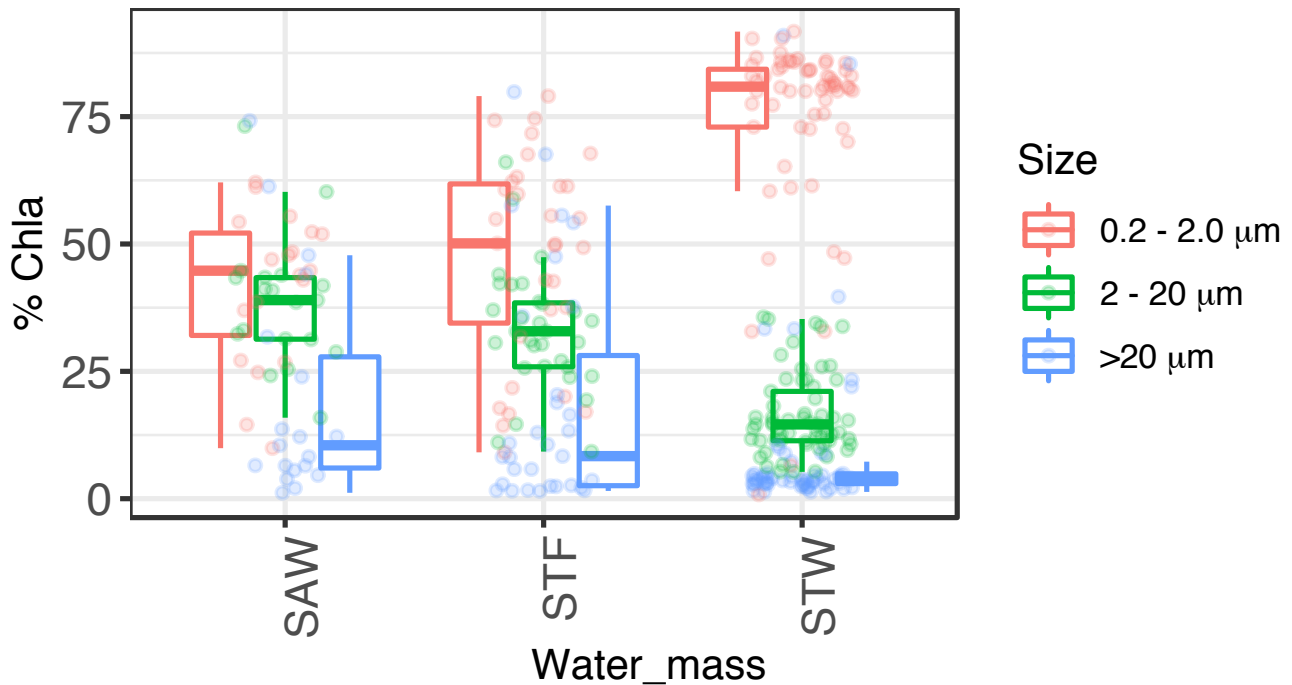

**Figure S3.** Supplementary Figure S3. Phytoplankton community size-structure. Box-plots show the chlorophyll a concentration associated to pico-, nano-, and micro-phytoplankton nominal size fractions (0.2-2 μm, 2-20 μm, >20 μm) in the surface mixed-layer of each water masses. Each dot correspond to a single sample. Box-plots show the median, first and third quartiles and the values within the  $\pm 1.5 * IQR$  (IQR, interquartile range). The figure includes data from TAN1516/Chatham Rise, TAN1702/Campbell Plateau, TAN1212/Spring Bloom, TAN1203/SOAP; n = 102.

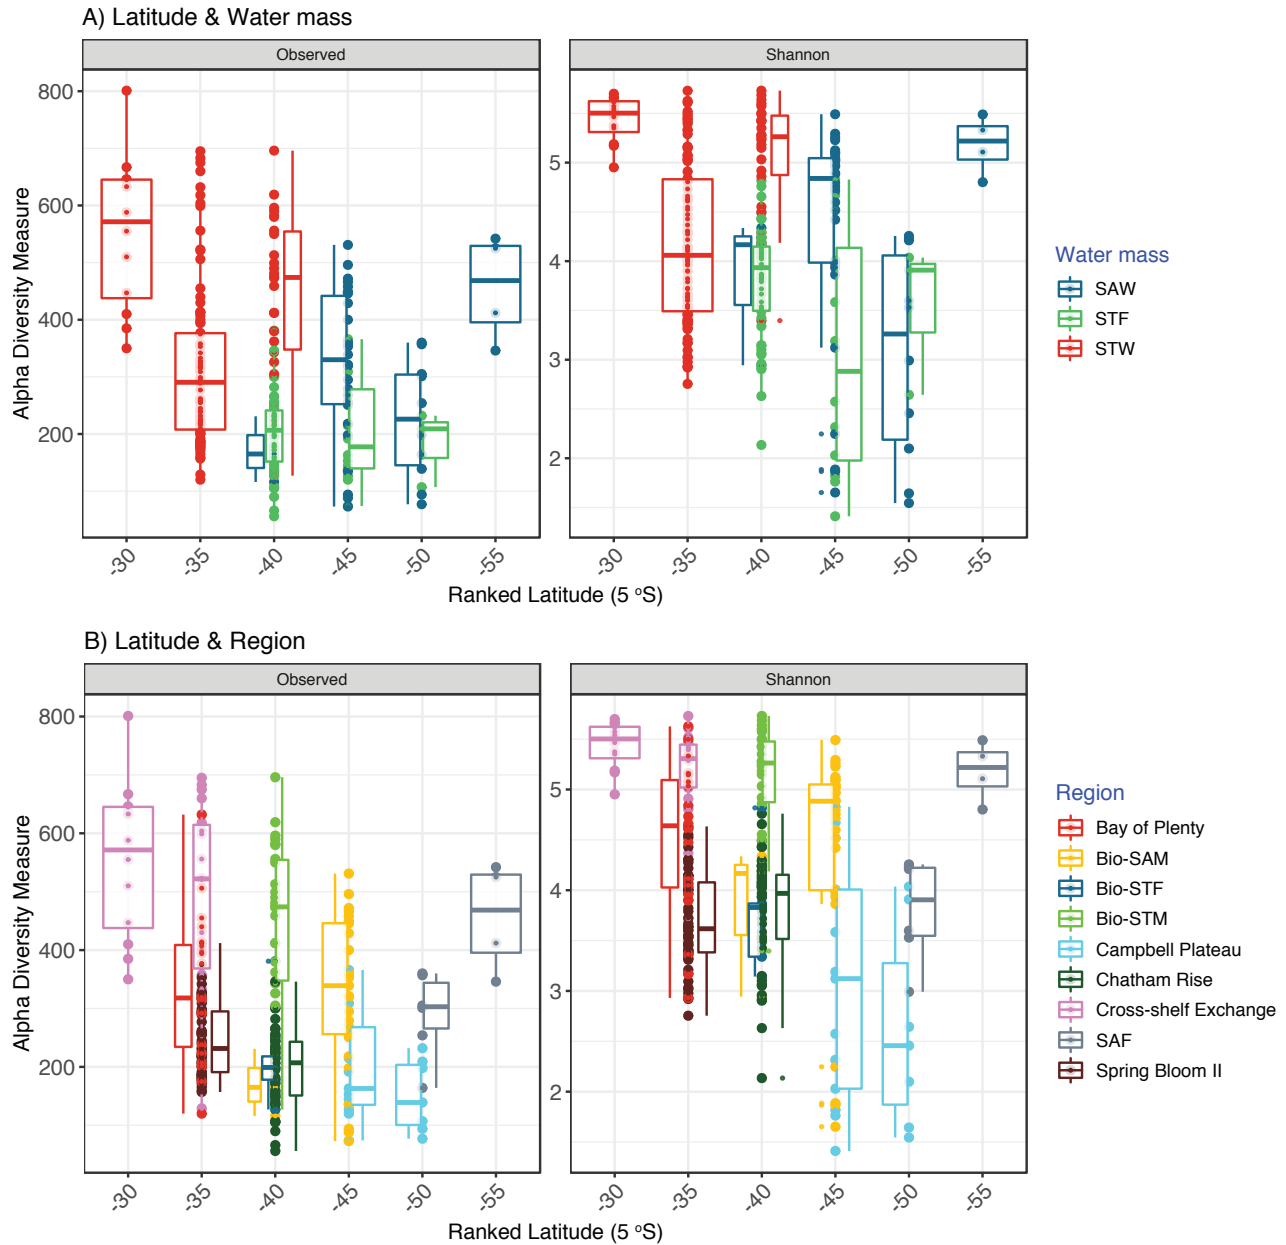

**Figure S4.** Supplementary Figure S4. Protist diversity richness and Shannon diversity index binned in 5° latitude bins and color coded by (A) water mass and (B) regions.

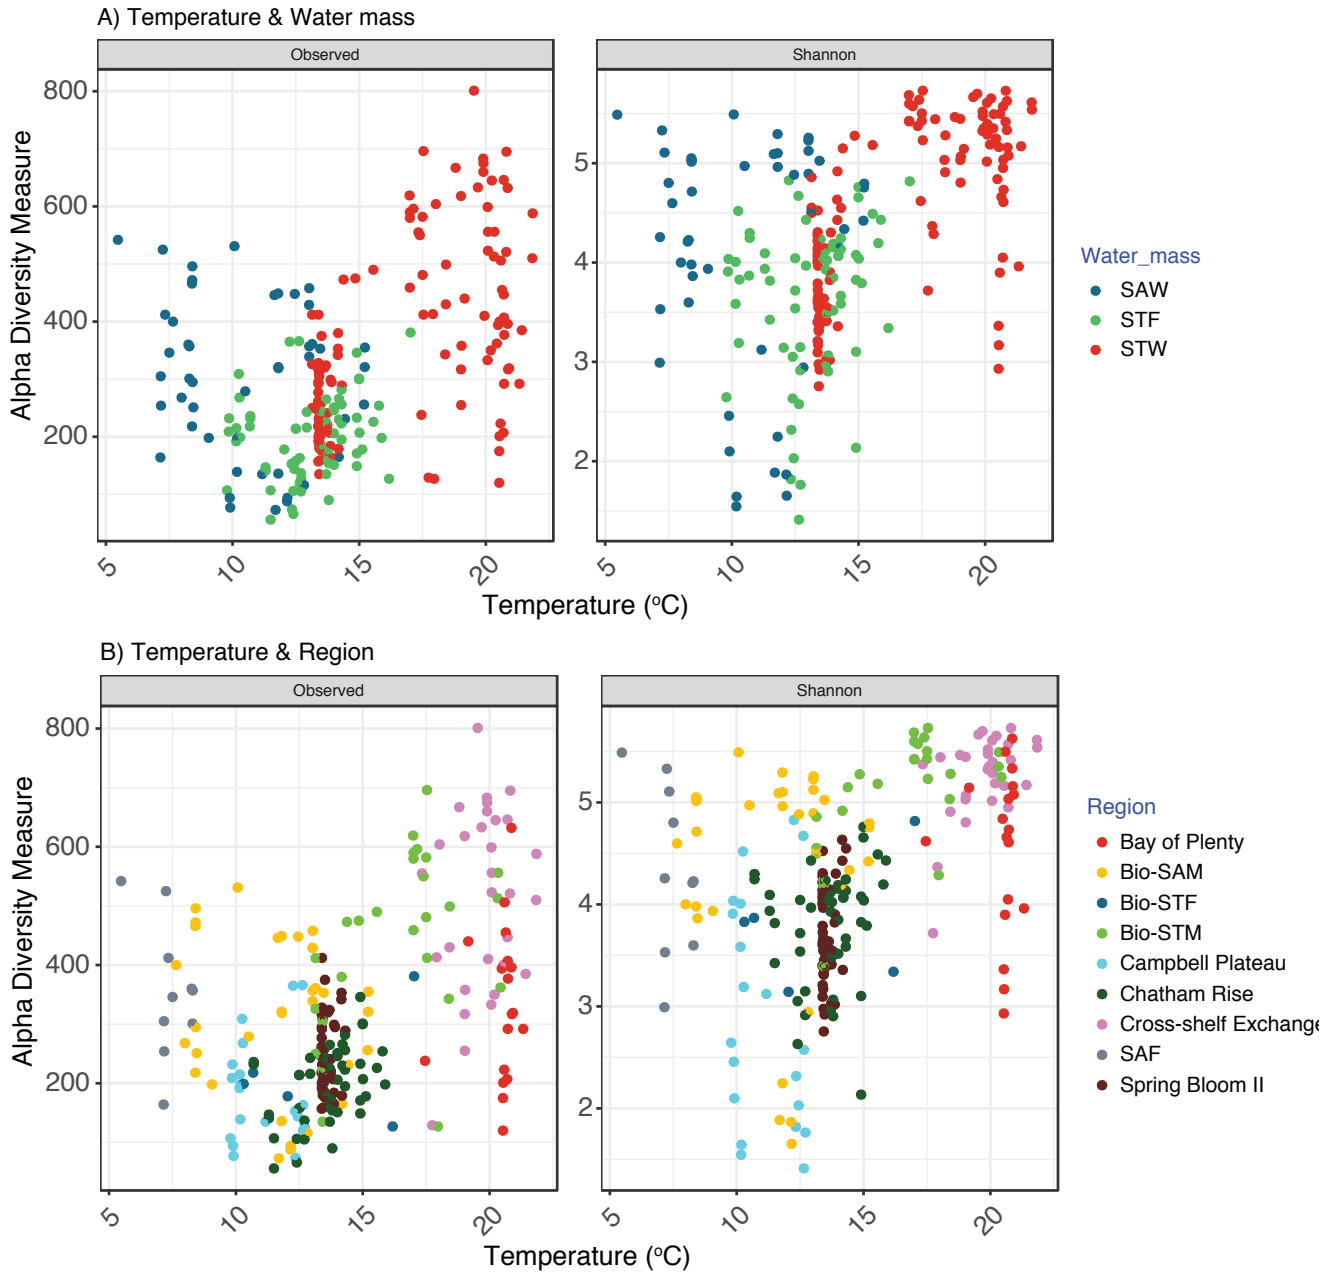

**Figure S5.** Supplementary Figure S5. Diversity and temperature. Protist diversity richness and Shannon diversity index binned in 5° latitude bins and color coded by (A) water mass and (B) regions.



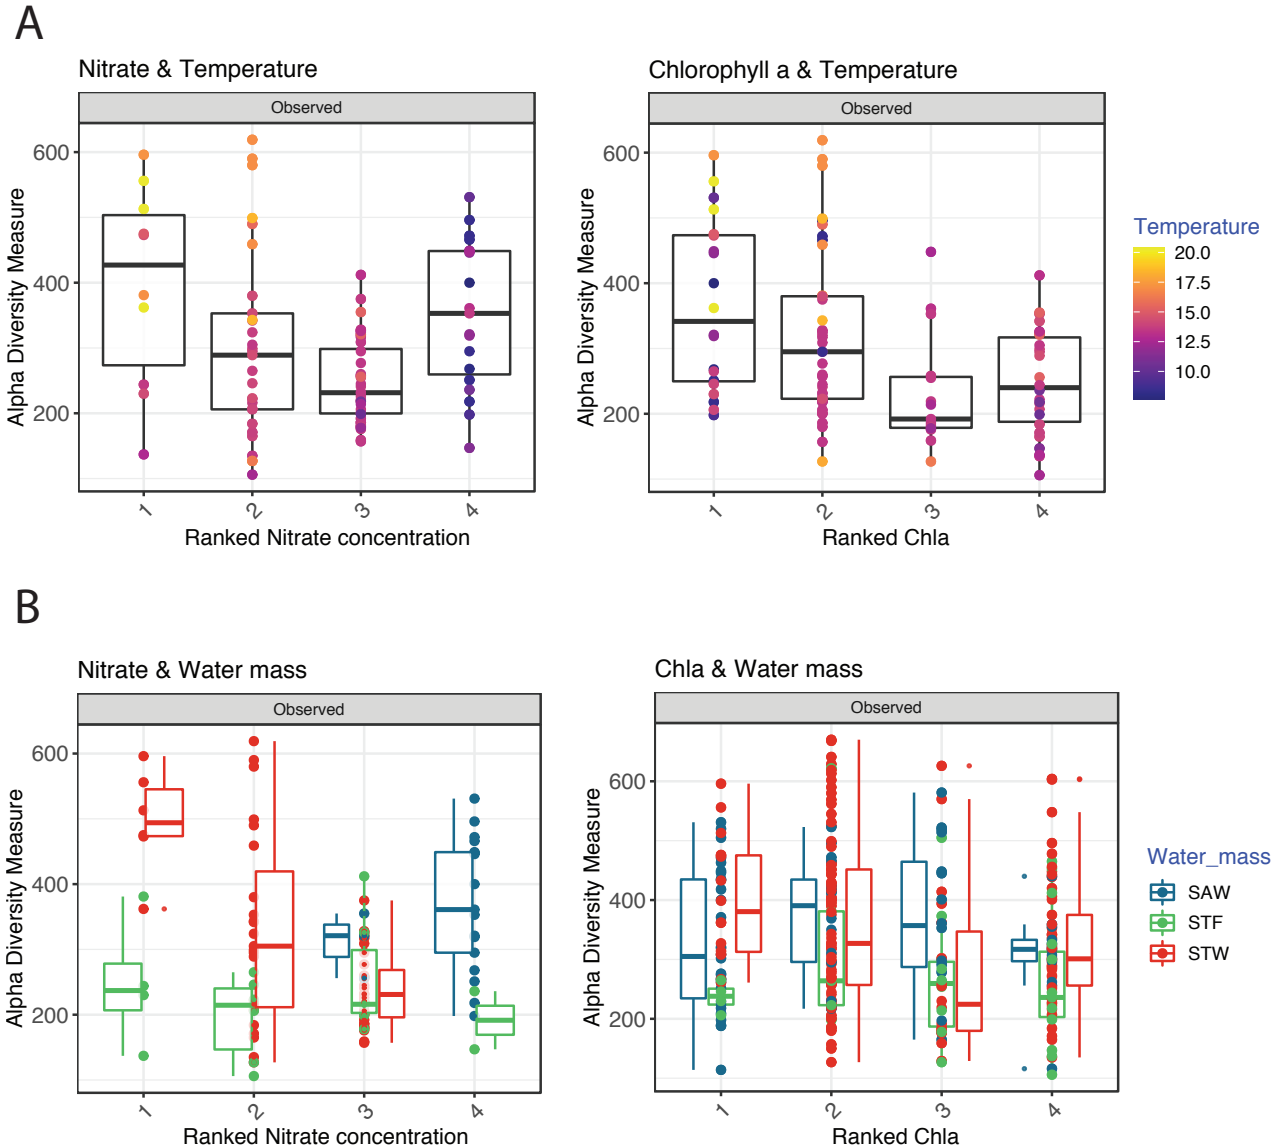

**Figure S6.** Supplementary Figure S6. Diversity and trophic conditions. Mean protist diversity richness in relation to nitrate and chlorophyll a concentrations in the euphotic zone and binned in four ranks and color coded by (A) temperature and (B) water mass. Function ntile was used to break individual measurements into buckets of the same size.

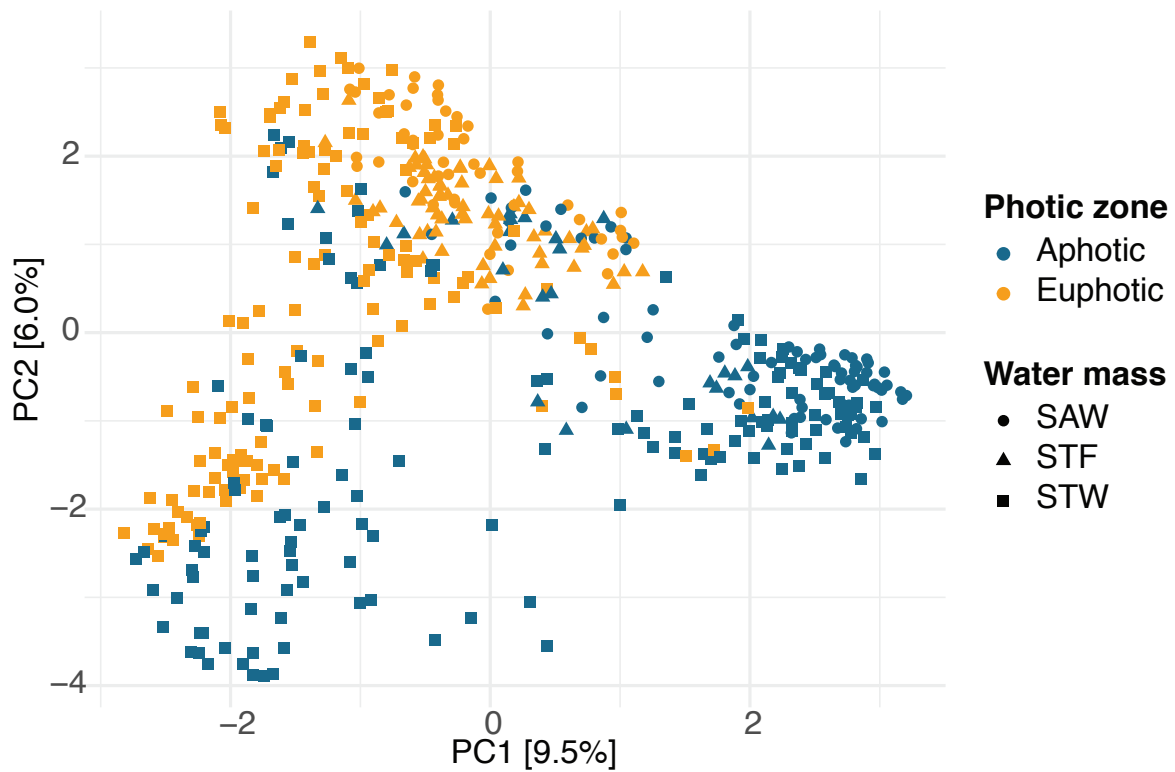

**Figure S7.** Supplementary Figure S7. Principal component analysis based on ASV composition of all samples coded by symbol color and shape, respectively, for the light layer and water masses where the samples were collected from.

STW - aphotic - Class

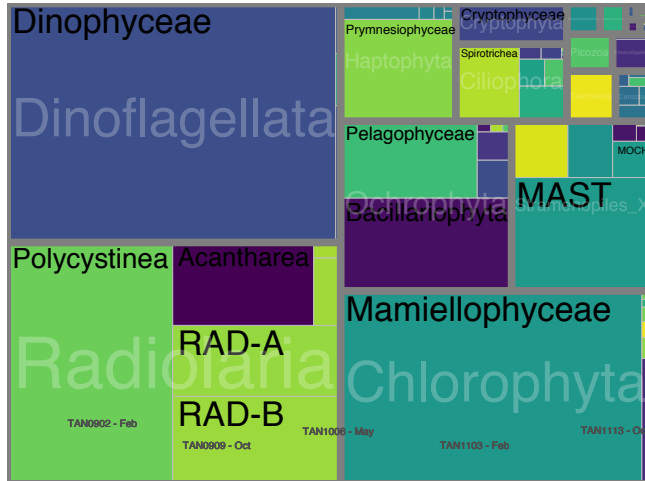

STW - aphotic - Genus

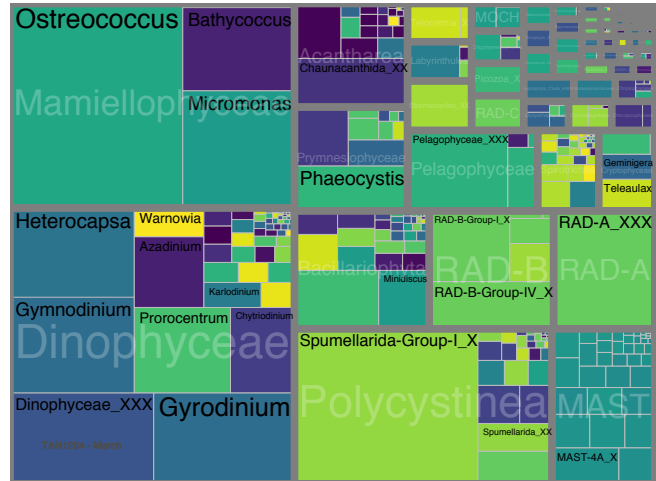

STF - aphotic - Class

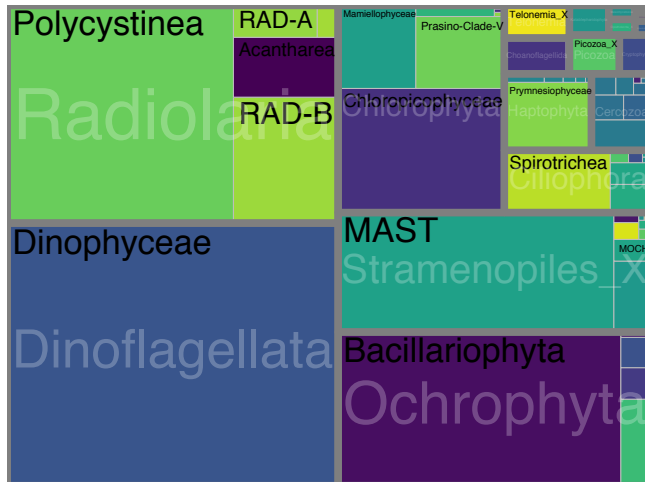

STF - aphotic - Genus

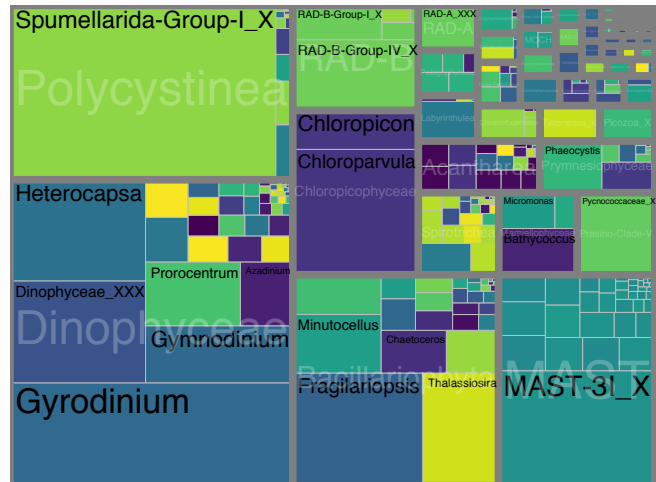

SAW - aphotic - Class

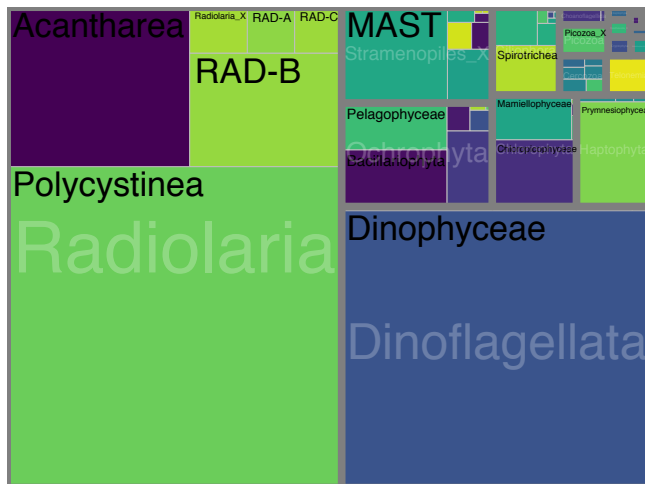

SAW - aphotic - Genus

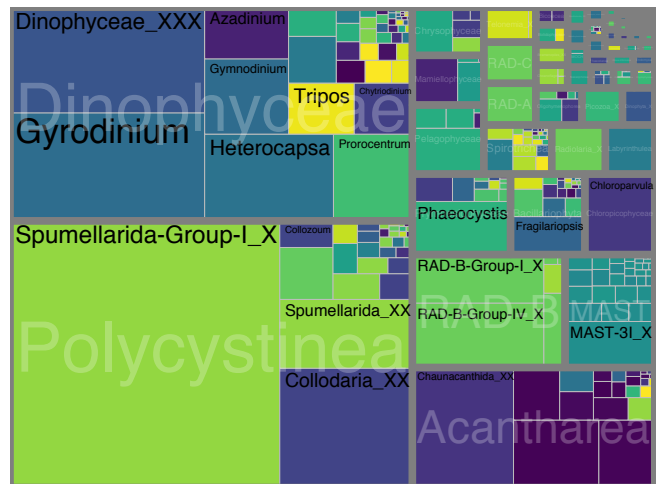

**Figure S8.** Supplementary Figure S8. Treemaps showing the mean relative abundance of main protistan groups divisions, class and genus in the aphotic zone of the STW, STF, and SAW sites. The area of each taxonomic group in the treemap represents the read abundances affiliated to each group standardized to the median sequencing depth across samples [ $\text{median sum otus} * (\text{otu reads} / \text{sum (otu reads)})$ ]

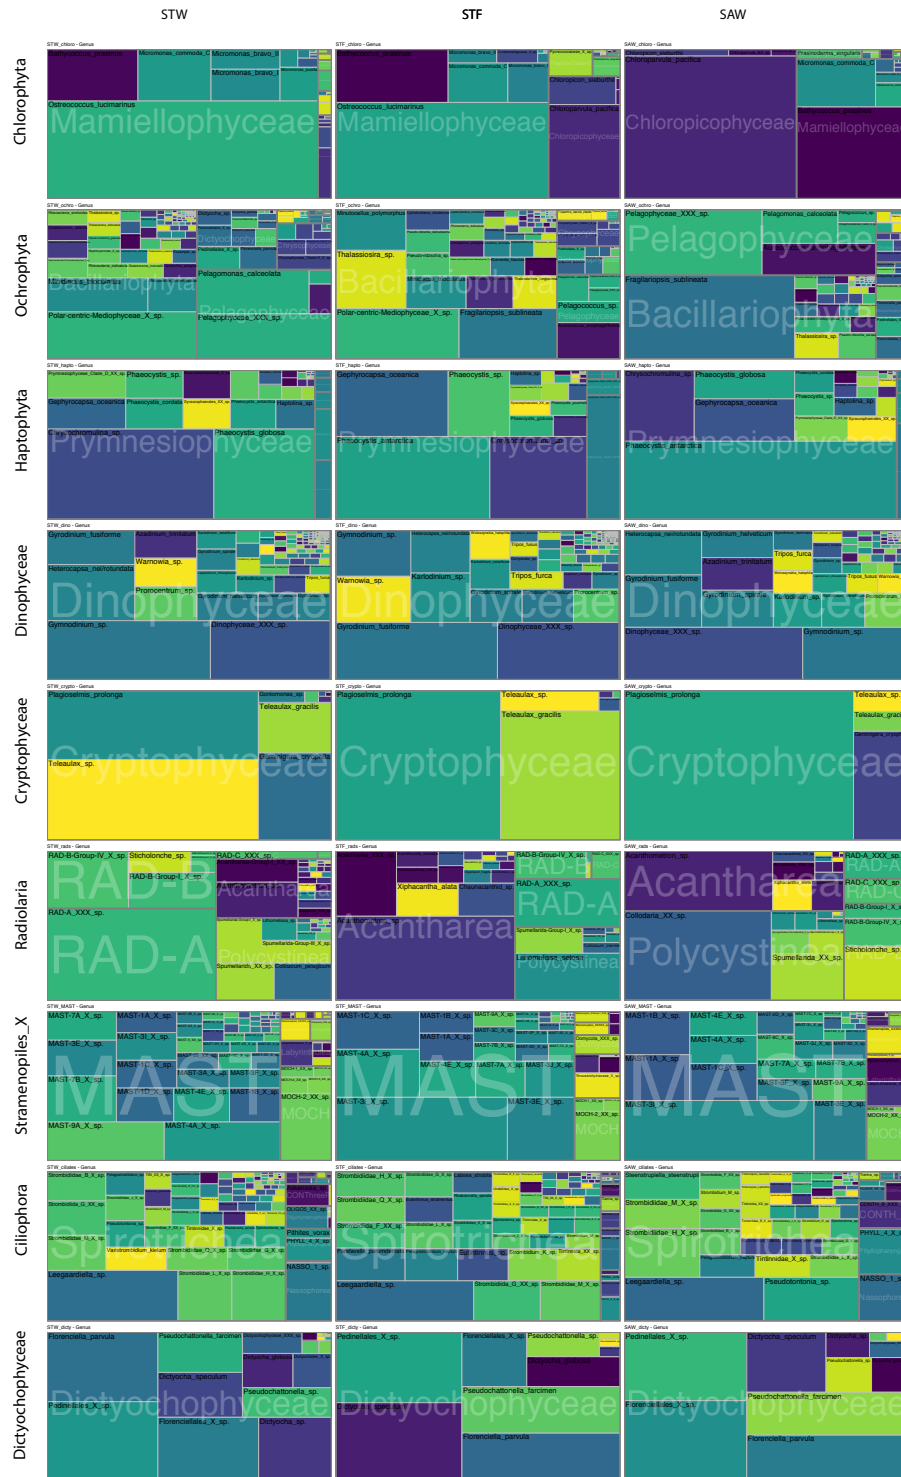

**Figure S9.** Supplementary Figure S9. Treemaps showing the mean relative abundance of main protistan classes and species within major taxonomic divisions in the euphotic zone of STW, STF, and SAW water masses.

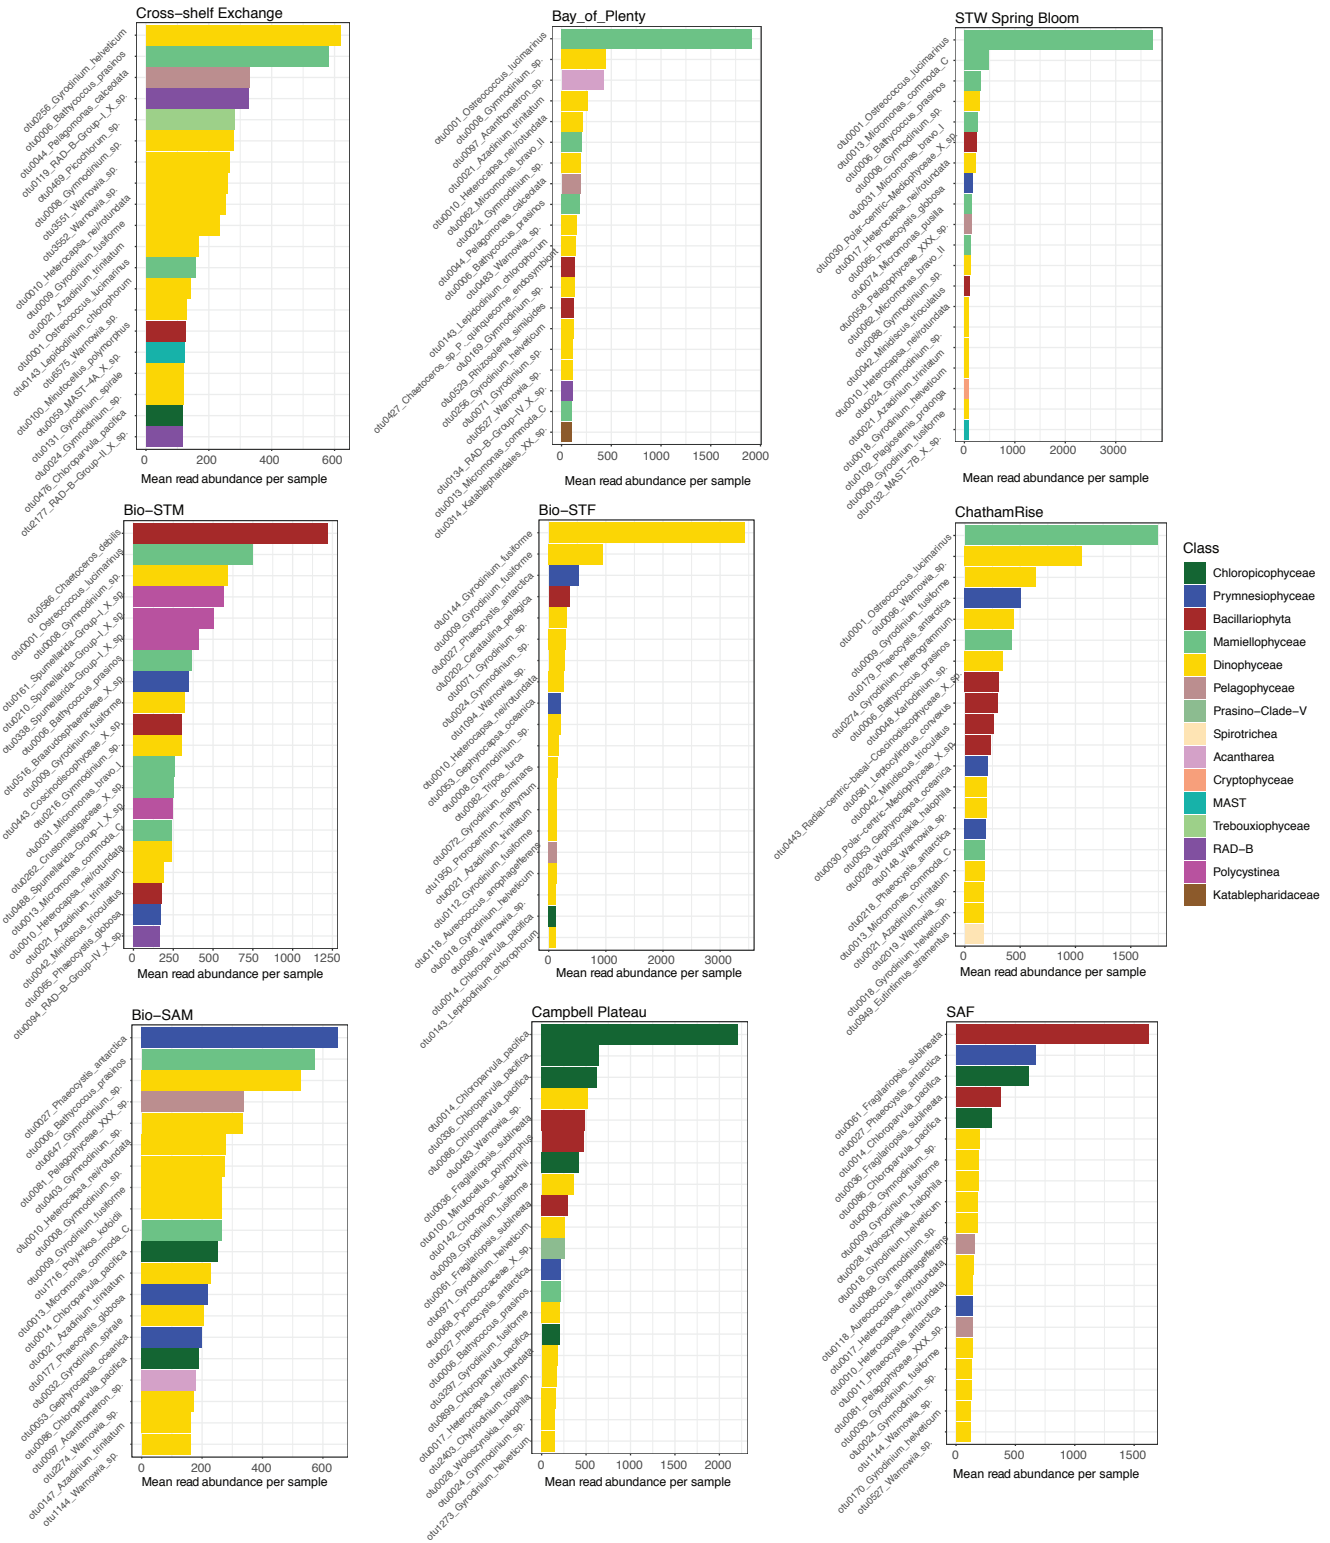

**Figure S10.** Supplementary Figure S10. Mean standardized read abundance of most abundant ASVs and assigned species in the euphotic zone of different regions and voyages, color coded for their class affiliation.

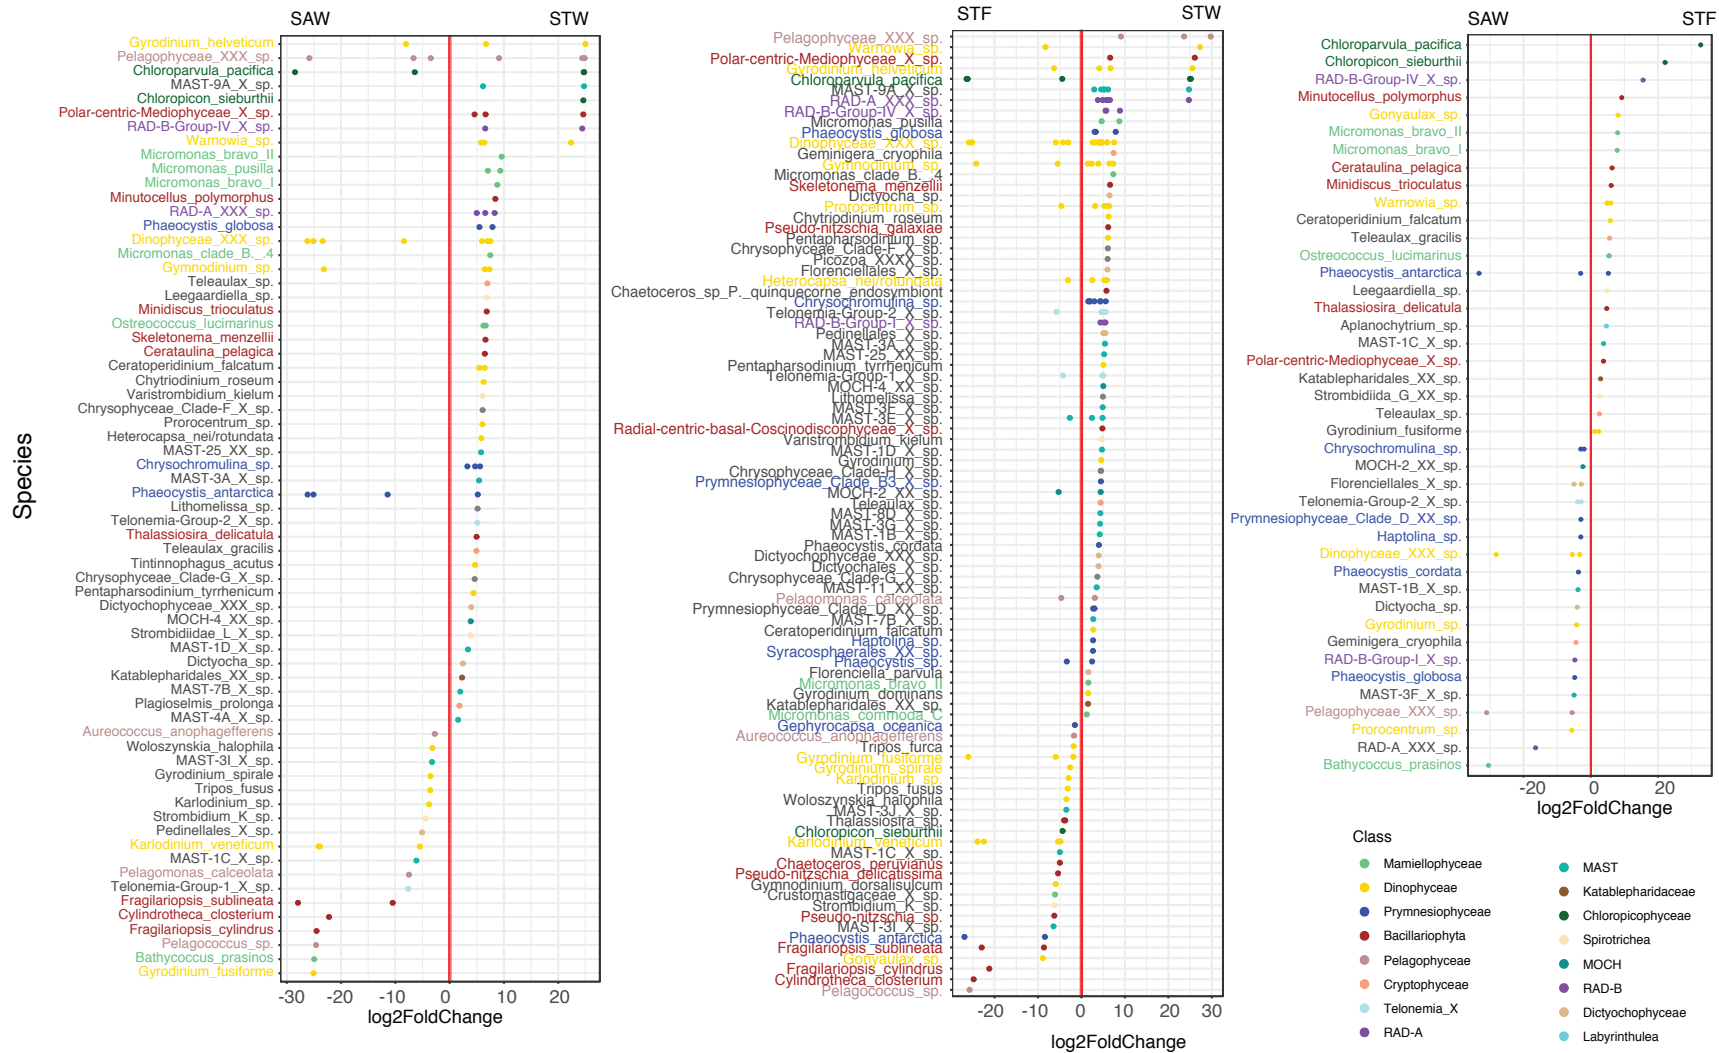

**Figure S11.** Supplementary Figure S11. Results from DESeq2 analysis depicting the species (Y-axis) with significantly different distribution between the euphotic zone of STW, SAW and STF waters. Difference in the distribution is expressed as the log2 fold change of the difference (X-axis). Each dot correspond to a different ASV color coded by their class affiliation.

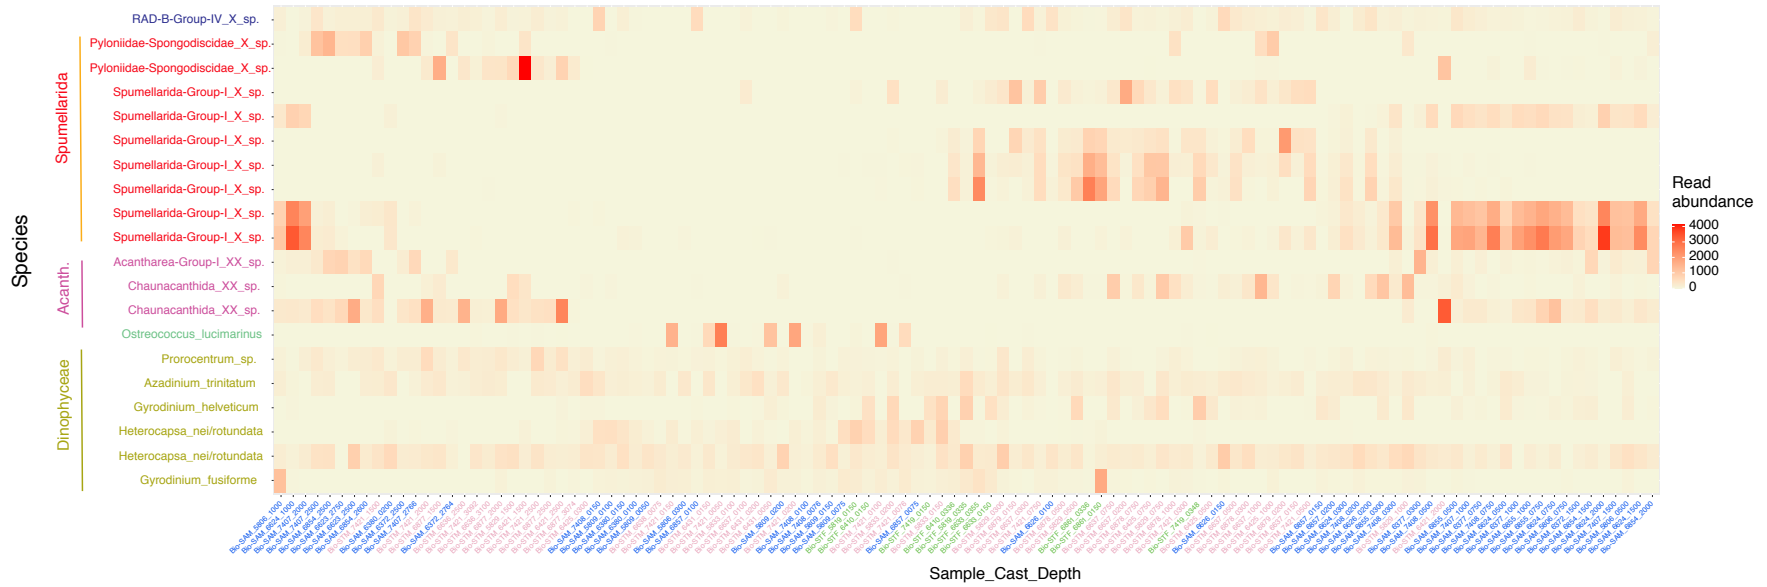

**Figure S12.** Supplementary Figure S12. Heatmap showing the abundance patterns of the top20 most abundant species in the aphotic zone of the Biophysical Mooring samples. Read abundance were normalized to mean sequencing depth. Samples are clustered using nMDS and Jaccard distance, and color coded according to the sampling site they were collected from (Bio-STM, purple; Bio-STF, green; Bio-SAM, blue). Species were organized and color coded by class affiliation.

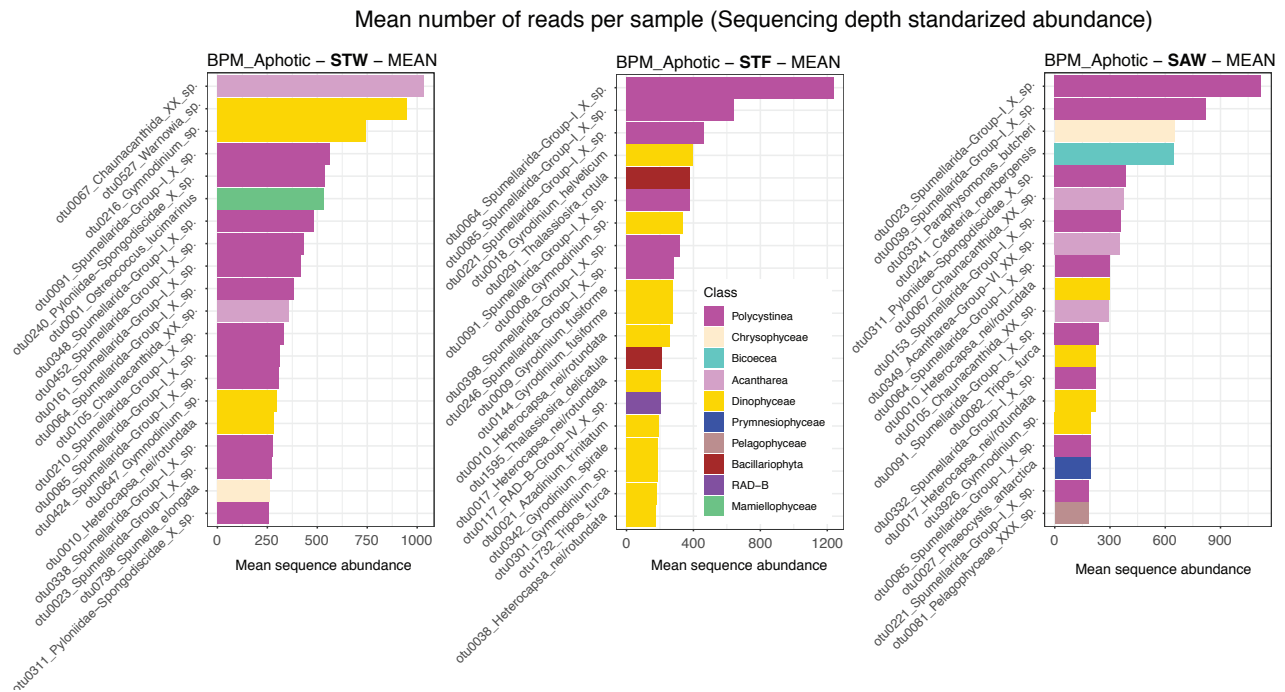

**Figure S13.** Supplementary Figure S13. Mean standardized read abundance of most abundant ASVs and assigned species in the aphotic zone of different water masses. Bars corresponding to each species color coded for their class affiliation.



**BPM-Aphotic – Protist-synd**

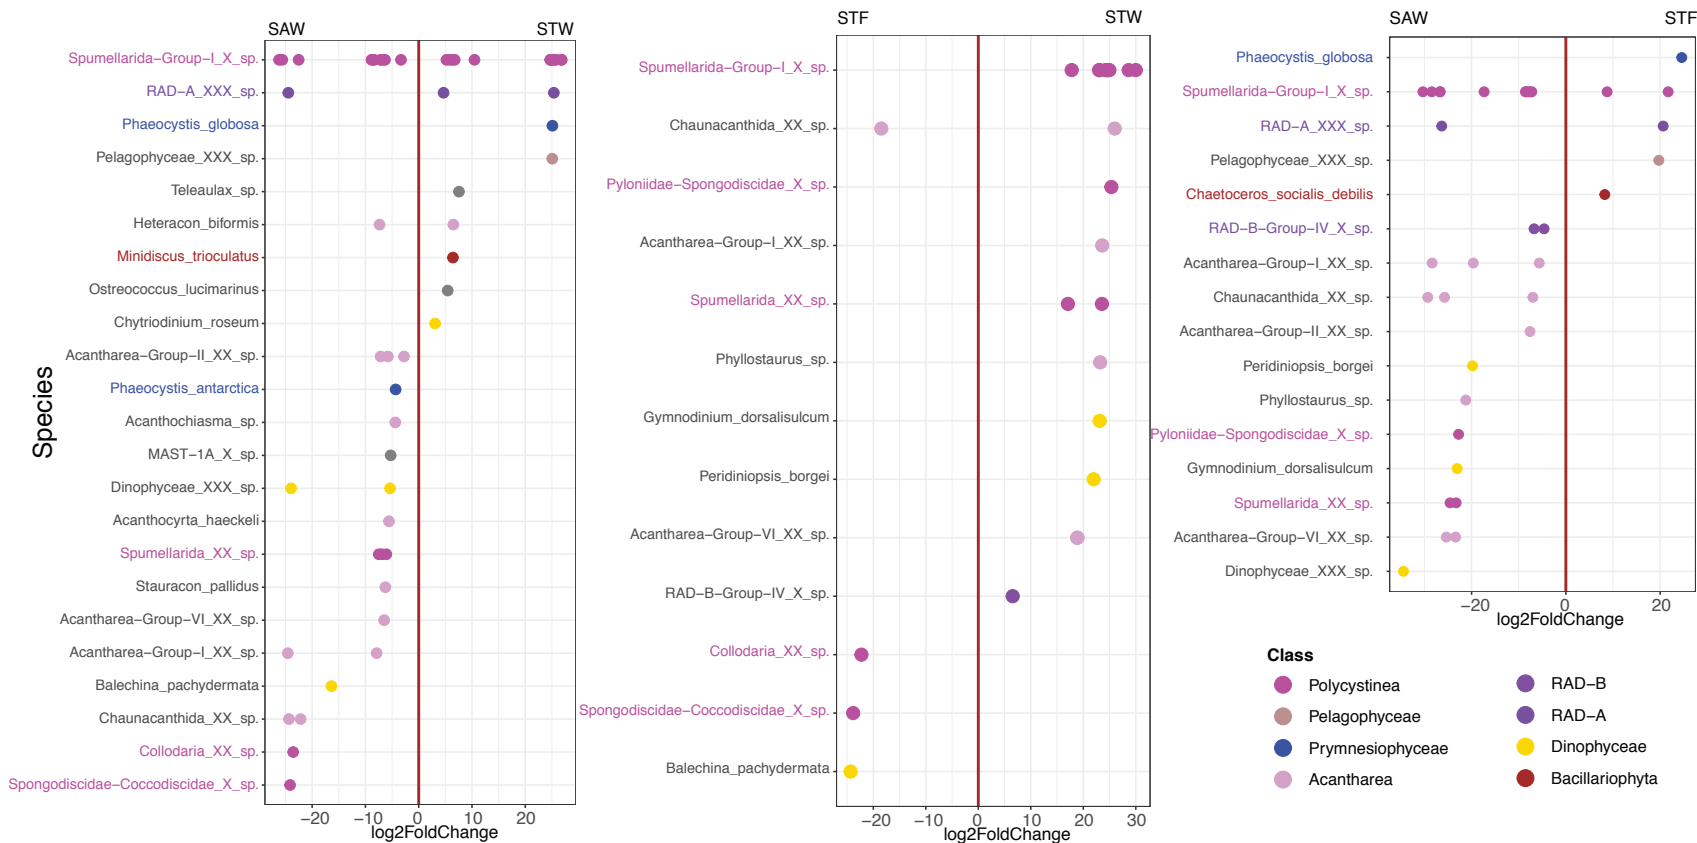

**Figure S14.** Supplementary Figure S14. Results from DESeq2 analysis depicting the species (Y-axis) with significantly different distribution between the aphotic zone of STW, SAW and STF waters. Difference in the distribution is expressed as the log<sub>2</sub> fold change of the difference (X-axis). Each dot correspond to a different ASV color coded by their class affiliation.

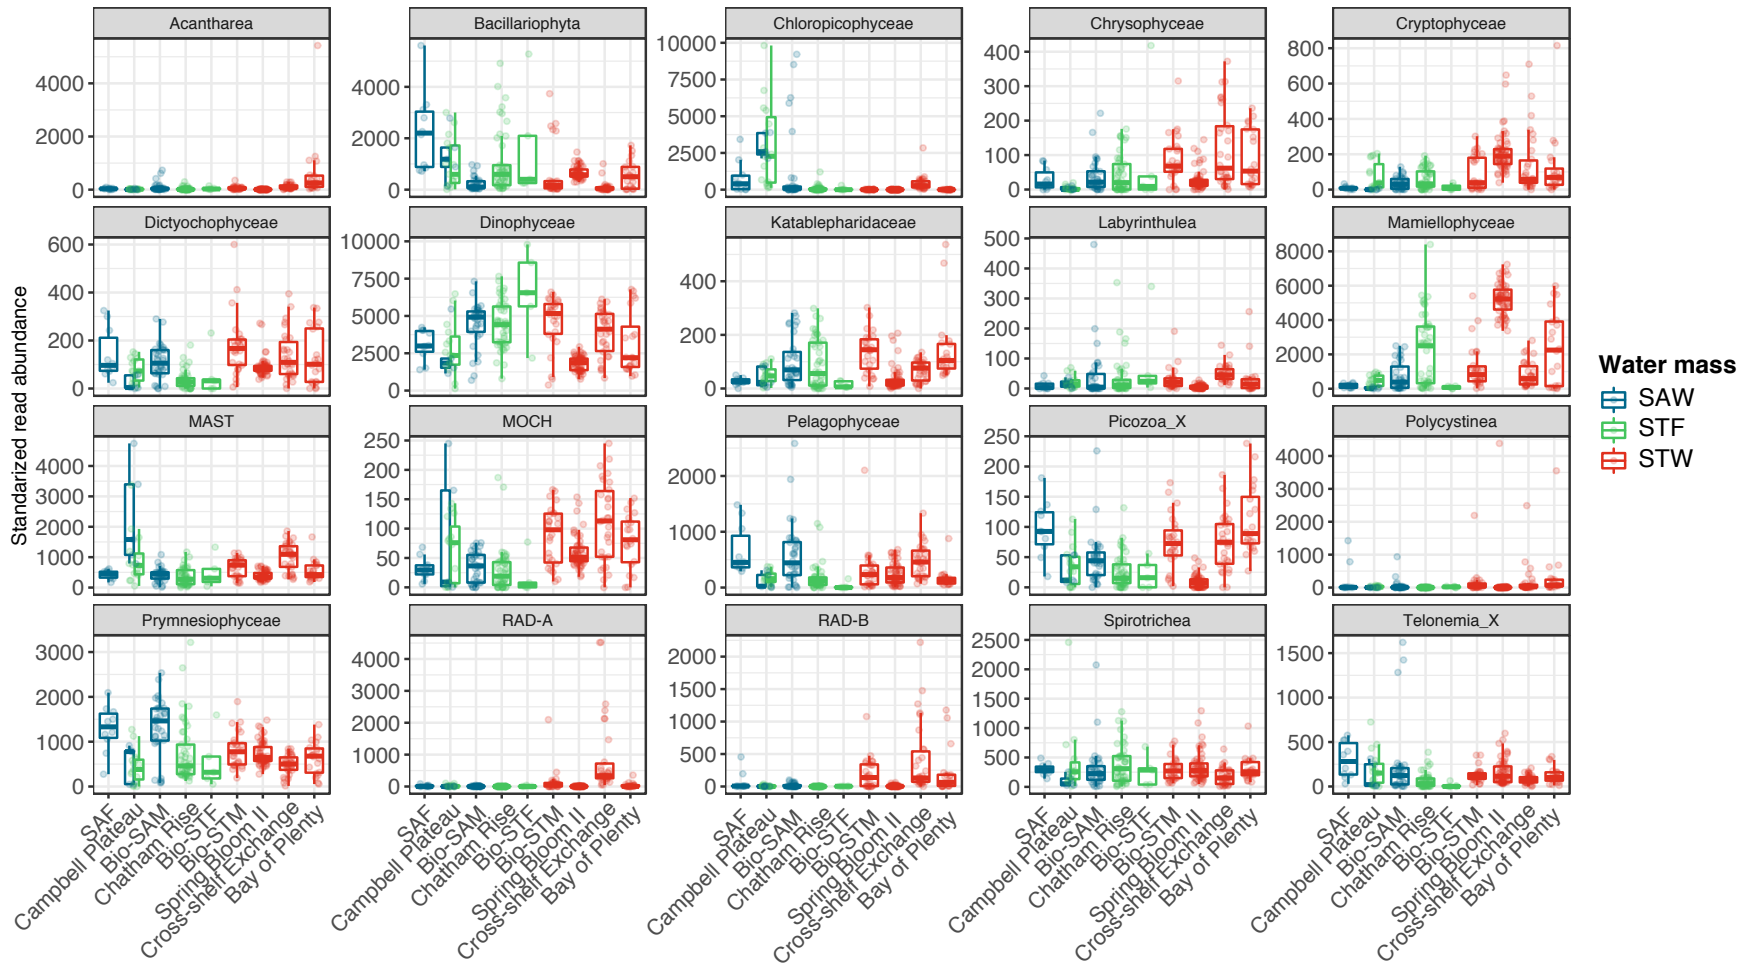

**Figure S15.** Supplementary Figure S15. Box-plots showing standardized read abundance of twentieth most abundant protist classes in the euphotic zone of different regions and color coded by different water masses. Box-plots show the median, the first and third quartiles (lower and upper hinges) and the values within the  $\pm 1.5 * IQR$  (IQR, interquartile range) (line). Points represent values of single samples

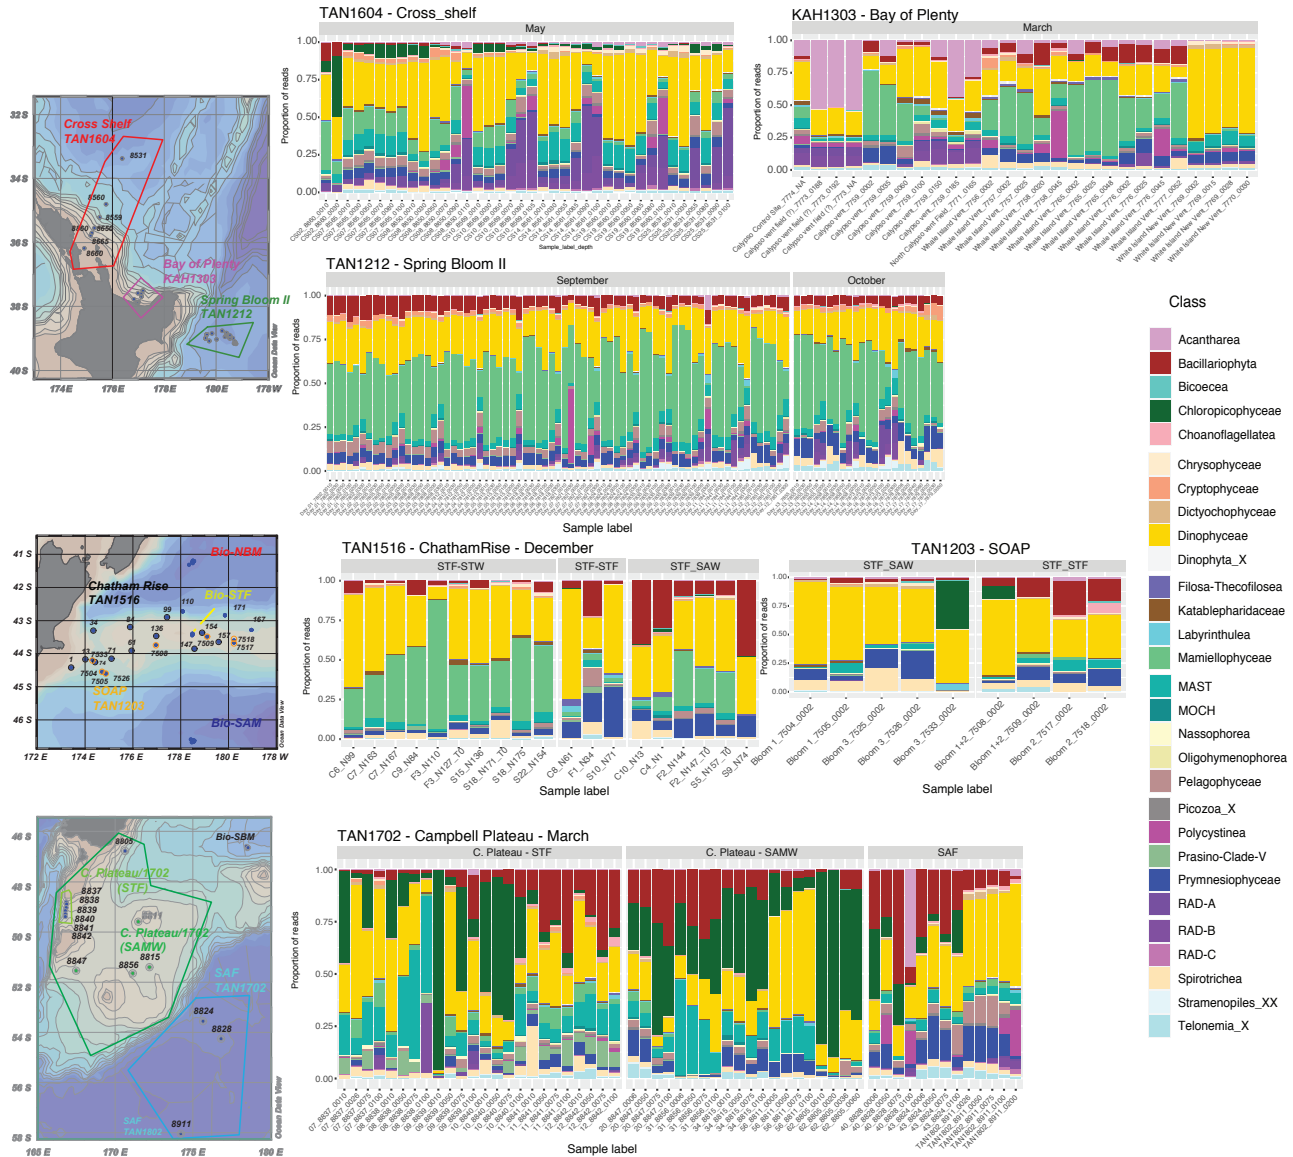

**Figure S16.** Supplementary Figure S16. Relative read abundance of main protistan classes in samples collected during different voyages and regions within the STW, STF and SAW water masses.

A

|                          | asv_0061 F... | KJ866919.1... AF525665.... | AF290085.... | asv_0108 F... | asv_1440 F... | asv_3502 F... | asv_1311 F... | asv_3242 F... | asv_0036 F... |
|--------------------------|---------------|----------------------------|--------------|---------------|---------------|---------------|---------------|---------------|---------------|
| asv_0061 F_sublineata    |               | 5                          | 5            | 5             | 5             | 10            | 7             | 7             | 6             |
| KJ866919.1 F_kerguele... | 5             |                            | 0            | 0             | 0             | 5             | 4             | 6             | 5             |
| AF525665.1 F_sublineata  | 5             | 0                          |              | 0             | 0             | 5             | 4             | 6             | 5             |
| AF290085.1.1672_U F...   | 5             | 0                          | 0            |               | 0             | 5             | 4             | 6             | 5             |
| asv_0108 F_sublineata    | 5             | 0                          | 0            |               |               | 5             | 4             | 6             | 5             |
| asv_1440 F_sublineata    | 10            | 5                          | 5            | 5             |               |               | 3             | 6             | 4             |
| asv_3502 F_sublineata    | 7             | 4                          | 4            | 4             | 4             |               | 3             | 4             | 3             |
| asv_1311 F_sublineata    | 7             | 6                          | 6            | 6             | 6             | 6             |               | 4             | 2             |
| asv_3242 F_sublineata    | 6             | 5                          | 5            | 5             | 5             | 4             | 3             |               | 1             |
| asv_0036 F_sublineata    | 6             | 5                          | 5            | 5             | 5             | 5             | 3             | 1             |               |

B

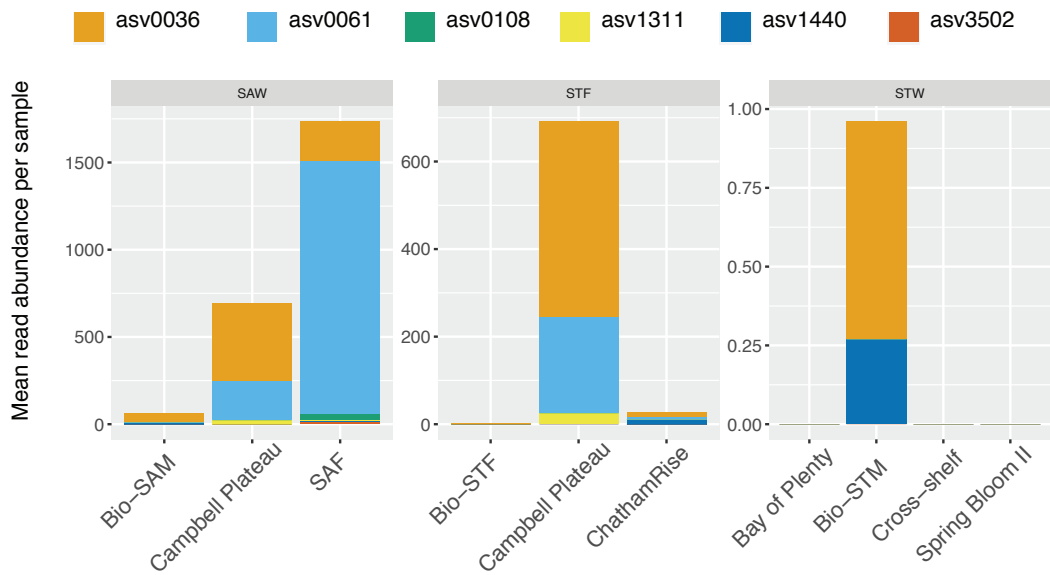

C

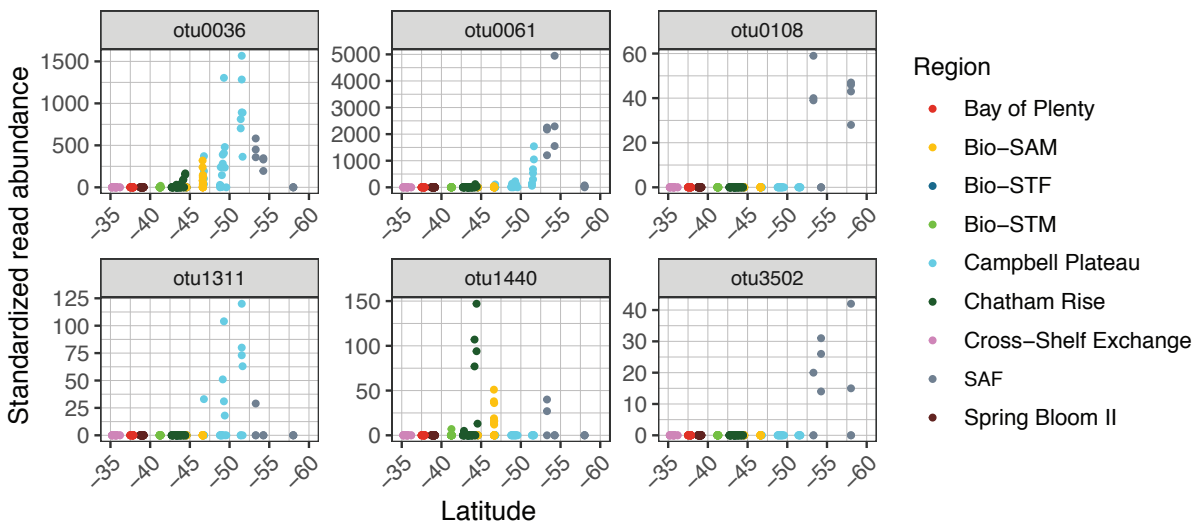

**Figure S17.** Supplementary Figure S17. (A) Matrix showing the number of nucleotide mismatches in the v4 region of the 18S rRNA between the most abundant ASVs assigned to *F. sublineata* and the annotated sequences for this and *F. kerguelensis* species included in PR2 reference database. (B) mean relative abundance of these ASVs in the euphotic zone of different water masses and regions. (C) distribution of these ASVs abundance (standardized read abundance) in each euphotic sample in relation to latitude and color coded by region.
